# Supplementary material for: Epidemiology of autism spectrum disorders: Global burden of disease 2019 and bibliometric analysis of risk factors
Source: PubMed Central journal article supplement (PMC9760802; doi:10.3389/fped.2022.972809), 2022-12-05
Supplement: Datasheet2.pdf [file Datasheet2.pdf]

## Supplementary Online Content

### Prevalence, incidence, and disability-adjusted life-years of Autism Spectrum Disorders 1990–2019:

#### Findings from the Global Burden of Disease study 2019

**eFigure 1.** Global disability-adjusted life-year (DALY) of autism spectrum disorders (ASD) in 2019. (A) DALYs of ASD by location for both sexes in 2019. (B) Age-standardized DALY rate of ASD by location for both sexes in 2019.

**eFigure 2.** Global prevalence of autism spectrum disorders (ASD) in 1990. (A) Prevalent cases of ASD by location for both sexes in 1990. (B) Age-standardized prevalence rate (ASPR) of ASD by location for both sexes in 1990.

**eFigure 3.** Global incidence of autism spectrum disorders (ASD) in 1990. (A) Incident cases of ASD by location for both sexes in 1990. (B) Age-standardized incidence rate (ASIR) of ASD by location for both sexes in 1990.

**eFigure 4.** Global disability-adjusted life-year (DALY) of autism spectrum disorders (ASD) in 1990. (A) DALYs of ASD by location for both sexes in 1990. (B) Age-standardized DALY rate of ASD by location for both sexes in 1990.

**eFigure 5.** Global disability-adjusted life-year (DALY) of autism spectrum disorders (ASD) by sex and sociodemographic index (SDI) quintiles from 1990 to 2019.

**eFigure 6.** The correlation analyses of EAPCs-ASR (1990). (A) The correlation between EAPC of ASPR and ASPR of 1990 by location for both sexes. (B) The correlation between EAPC of ASIR and ASIR of 1990 by location for both sexes. (C) The correlation between EAPC of age-standardized DALY rate and ASDR of 1990 by location for both sexes. Note: ASD, autism spectrum disorders; ASPR, age-standardized prevalence rate; ASIR, age-standardized incidence rate; DALY, disability-adjusted life year; EAPC, estimated annual percentage change; SDI, sociodemographic index.

**eFigure 7.** The correlation analyses of EAPCs-SDI (2019). (A) The correlation between EAPC of ASPR and SDI of 2019 by location for both sexes. (B) The correlation between EAPC of ASIR and SDI of 2019 by location for both sexes. (C) The correlation between EAPC of age-standardized DALY rate and SDI of 2017 by location for both sexes. The size of circle represents the quantity of ASD patients in one country or territory. Note: ASD, autism spectrum disorders; ASPR, age-standardized prevalence rate; ASIR,

age-standardized incidence rate; DALY, disability-adjusted life year; EAPC, estimated annual percentage change; SDI, sociodemographic index.

**eFigure 8.** The change trends and correlation analyses of age-standardized prevalence rate (ASPR) and sociodemographic index (SDI) in 21 regions from 1990 to 2019.

**eFigure 9.** The change trends and correlation analyses of age-standardized incidence rate (ASIR) and sociodemographic index (SDI) in 21 regions from 1990 to 2019.

**eFigure 10.** The change trends and correlation of age-standardized disability-adjusted life year (DALY) rate and sociodemographic index (SDI) in 21 regions from 1990 to 2019.

**eTable 1.** Number and age-standardized prevalence rate for ASD globally and by SDI group, GBD region and super-region, country, and territory in 1990 and 2019.

**eTable 2.** Number and age-standardized rates of incidence for ASD globally and by SDI group, GBD region and super-region, country, and territory in 1990 and 2019.

**eTable 3.** Number and age-standardized rates of DALYs for ASD globally and by SDI group, GBD region and super-region, country, and territory in 1990 and 2019.

**eTable 4.** Top 20 countries with autism spectrum disorders (ASD) in 2019.

**eTable 5.** Prevalence, incidence, and disability-adjusted life year rates by age group in 1990 and 2019.

**eFigure 1.** Global disability-adjusted life-year (DALY) of autism spectrum disorders (ASD) in 2019.

(A) DALYs of ASD by location for both sexes in 2019.

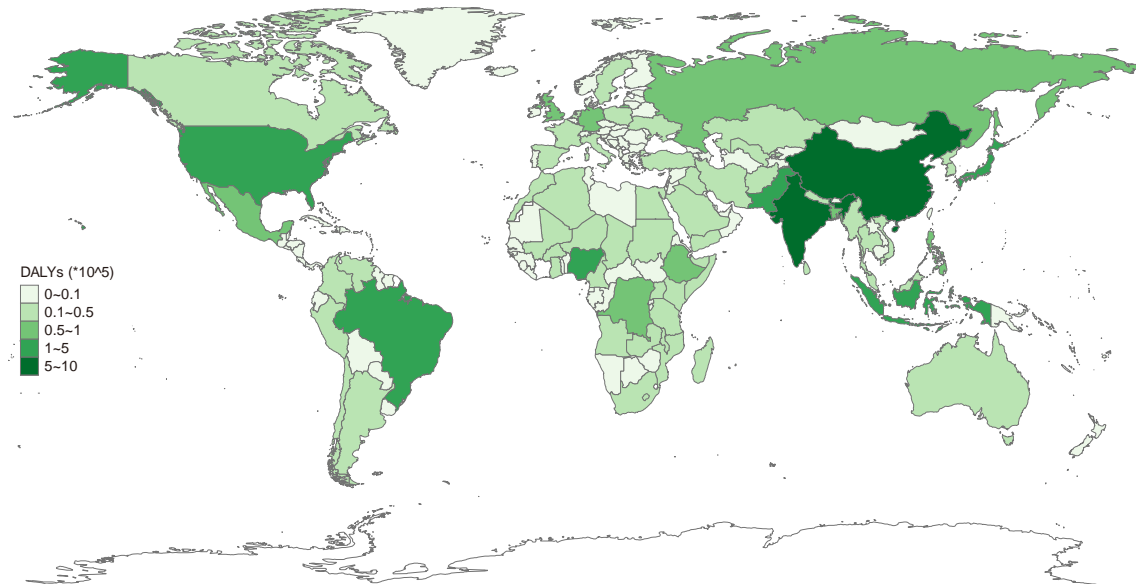

(B) Age-standardized DALY rate of ASD by location for both sexes in 2019.

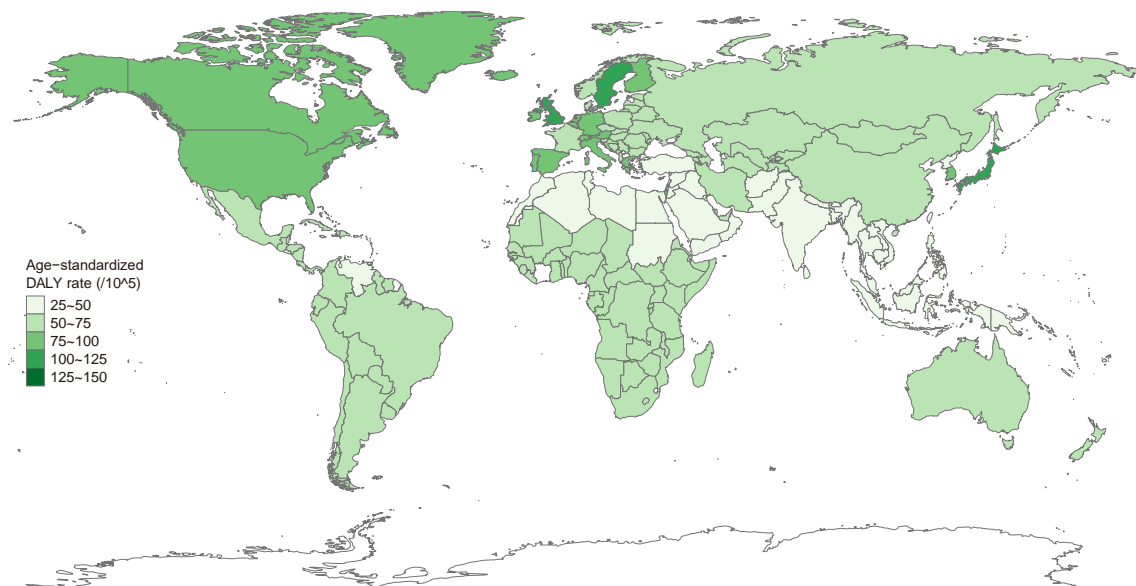

**eFigure 2.** Global prevalence of autism spectrum disorders (ASD) in 1990.

(A) Prevalent cases of ASD by location for both sexes in 1990.

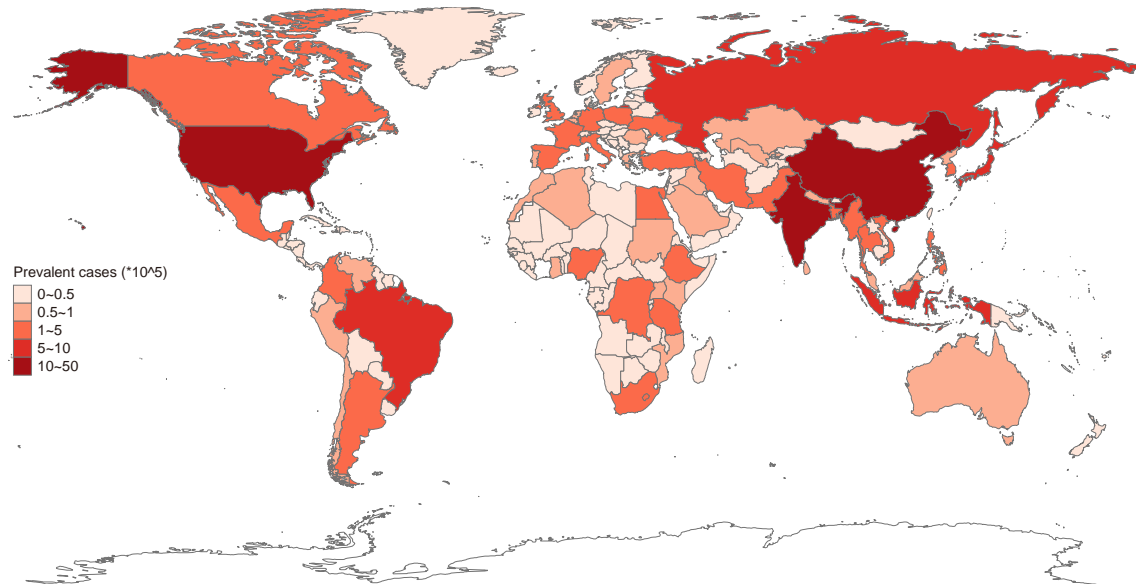

(B) Age-standardized prevalence rate (ASPR) of ASD by location for both sexes in 1990.

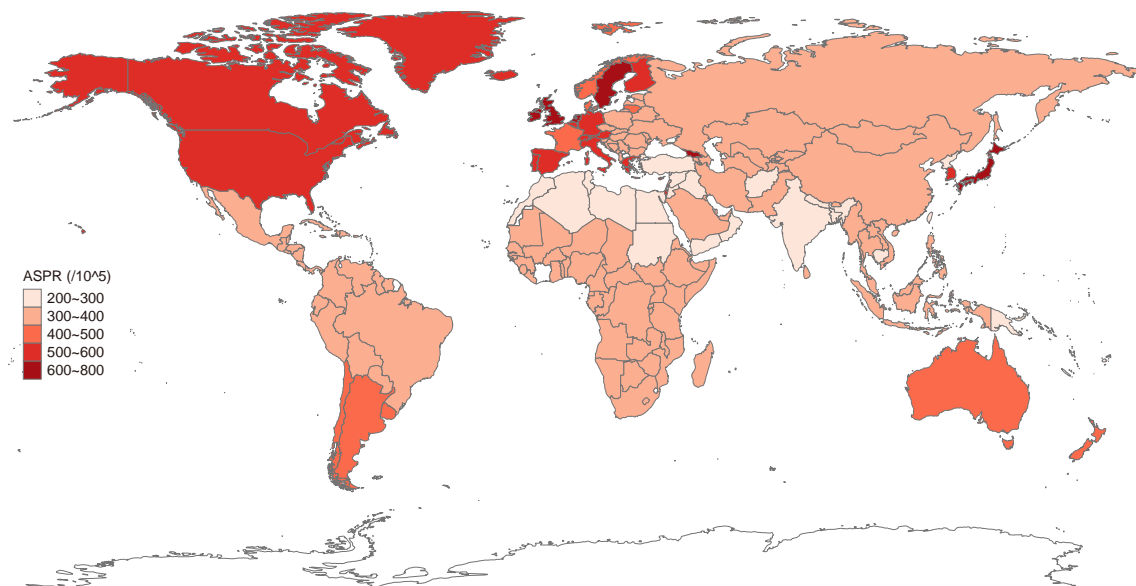

**eFigure 3.** Global incidence of autism spectrum disorders (ASD) in 1990.

(A) Incident cases of ASD by location for both sexes in 1990.

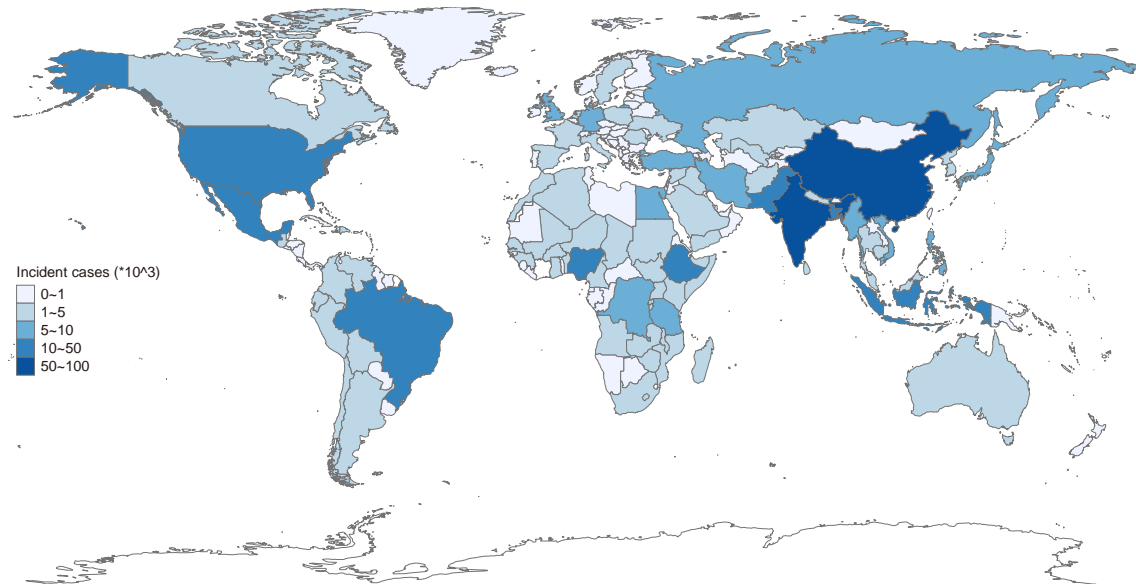

(B) Age-standardized incidence rate (ASIR) of ASD by location for both sexes in 1990.

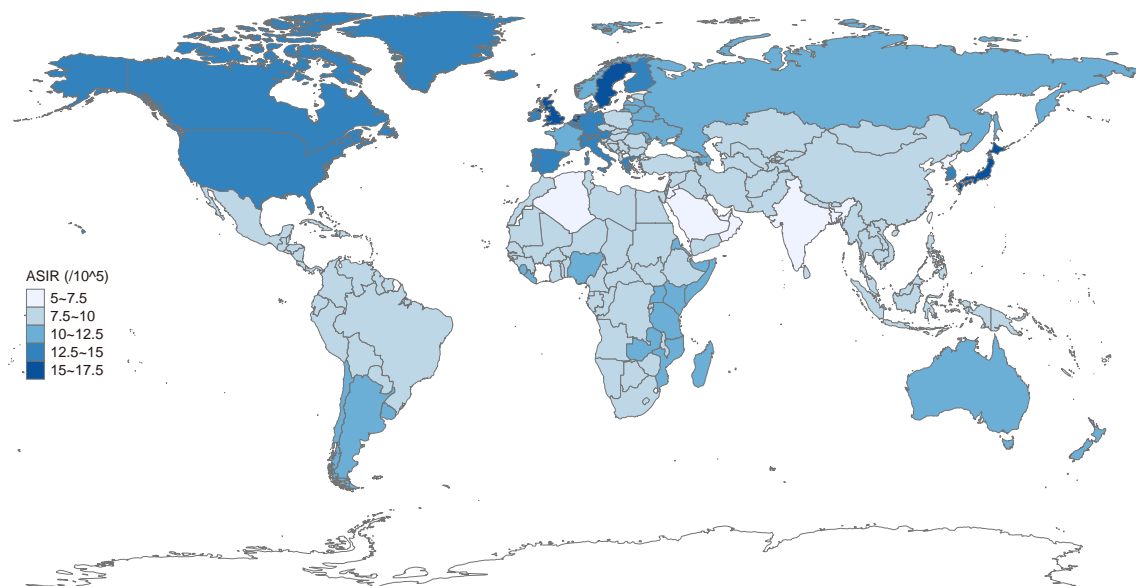

**eFigure 4.** Global disability-adjusted life-year (DALY) of autism spectrum disorders (ASD) in 1990.

(A) DALYs of ASD by location for both sexes in 1990.

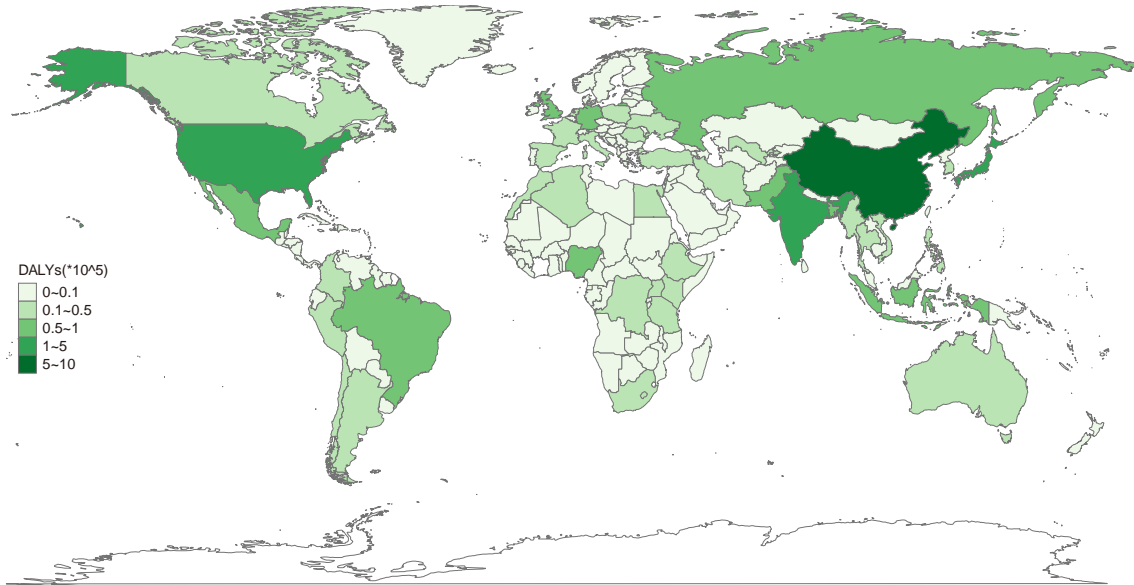

(B) Age-standardized DALY rate of ASD by location for both sexes in 1990.

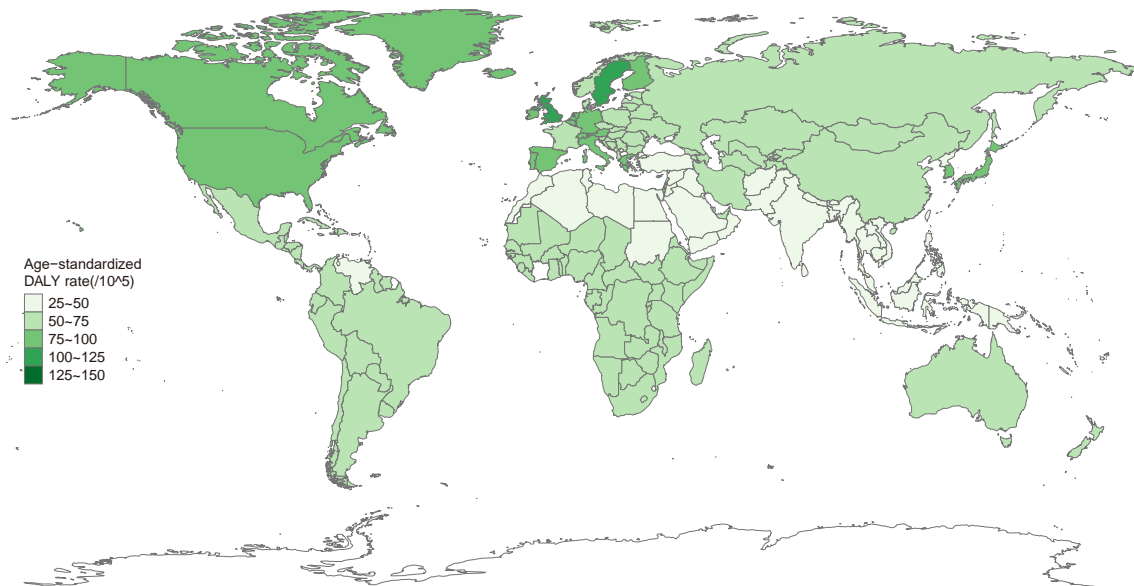

**eFigure 5.** Global disability-adjusted life-year (DALY) of autism spectrum disorders (ASD) by sex and sociodemographic index (SDI) quintiles from 1990 to 2019.

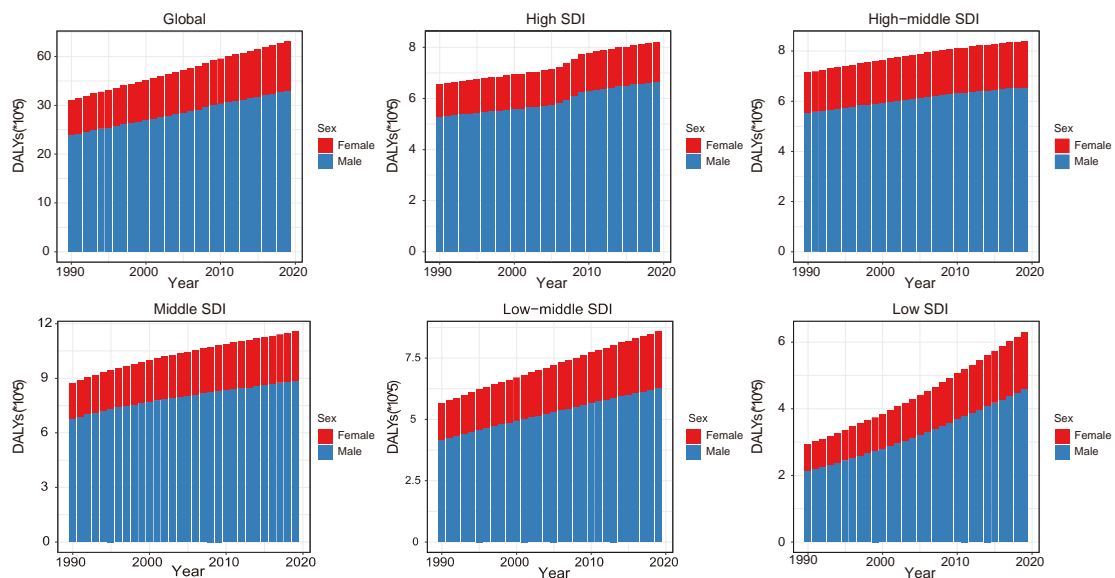

**eFigure 6.** The correlation analyses of EAPCs-ASR (1990). (A) The correlation between EAPC of ASPR and ASPR of 1990 by location for both sexes. (B) The correlation between EAPC of ASIR and ASIR of 1990 by location for both sexes. (C) The correlation between EAPC of age-standardized DALY rate and ASDR of 1990 by location for both sexes. Note: ASD, autism spectrum disorders; ASPR, age-standardized prevalence rate; ASIR, age-standardized incidence rate; DALY, disability-adjusted life year; EAPC, estimated annual percentage change; SDI, sociodemographic index.

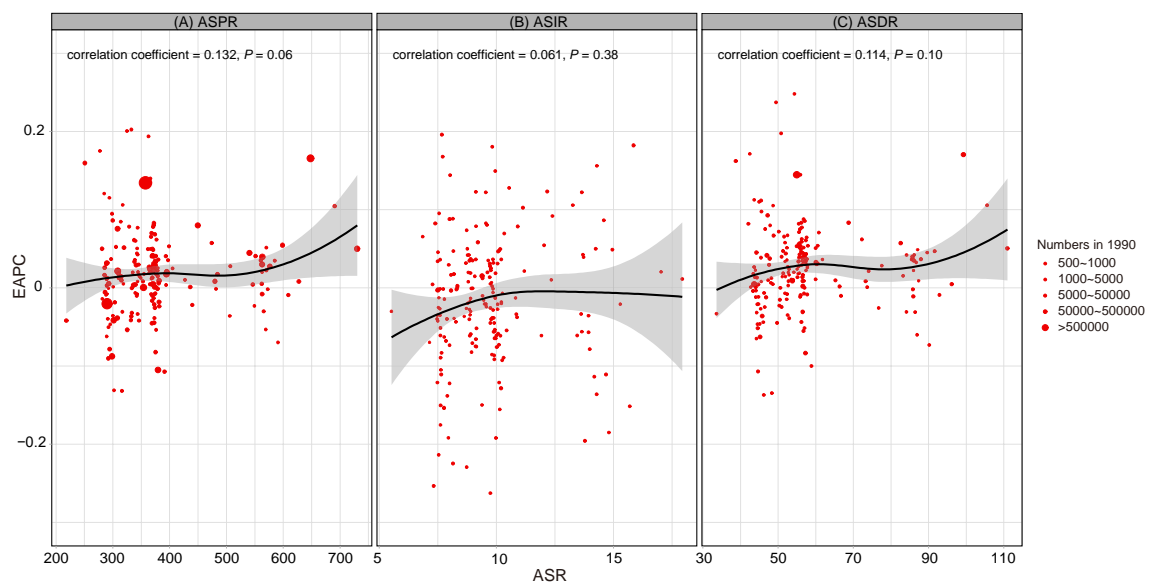

**eFigure 7.** The correlation analyses of EAPCs-SDI (2019). (A) The correlation between EAPC of ASPR and SDI of 2019 by location for both sexes. (B) The correlation between EAPC of ASIR and SDI of 2019 by location for both sexes. (C) The correlation between EAPC of age-standardized DALY rate and SDI of 2017 by location for both sexes. The size of circle represents the quantity of ASD patients in one country or territory. Note: ASD, autism spectrum disorders; ASPR, age-standardized prevalence rate; ASIR, age-standardized incidence rate; DALY, disability-adjusted life year; EAPC, estimated annual percentage change; SDI, sociodemographic index.

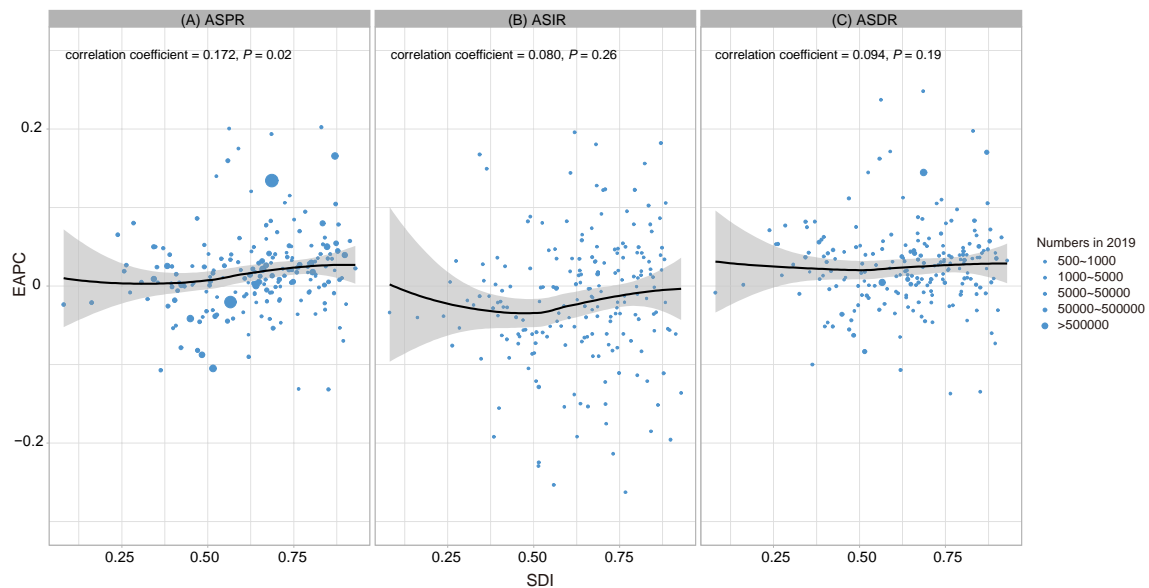

**eFigure 8.** The change trends and correlation analyses of age-standardized prevalence rate (ASPR) and sociodemographic index (SDI) in 21 regions from 1990 to 2019.

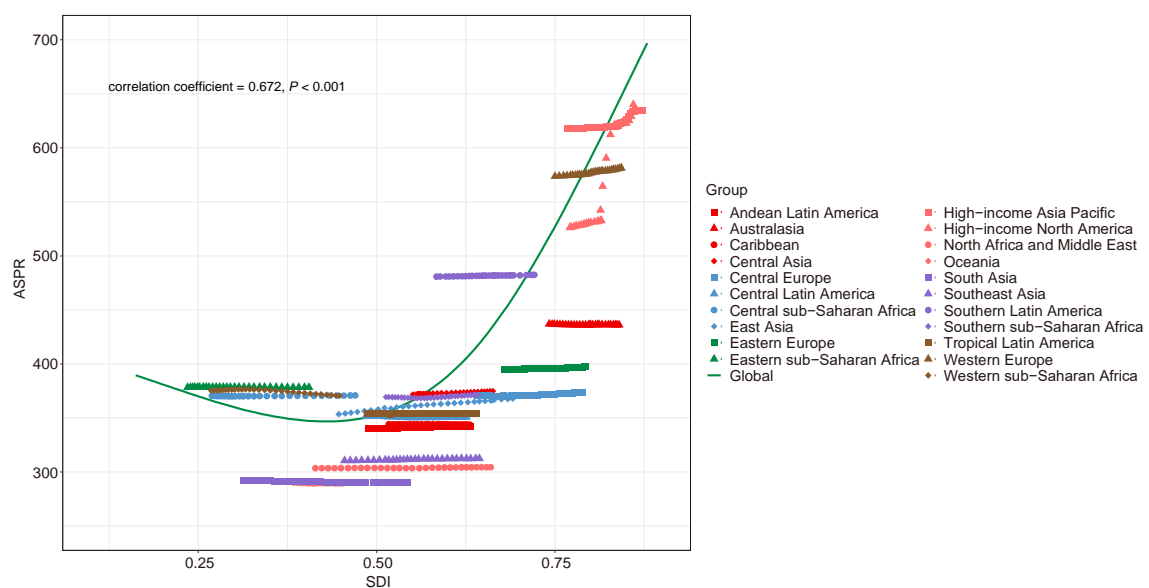



**eFigure 9.** The change trends and correlation analyses of age-standardized incidence rate (ASIR) and sociodemographic index (SDI) in 21 regions from 1990 to 2019.

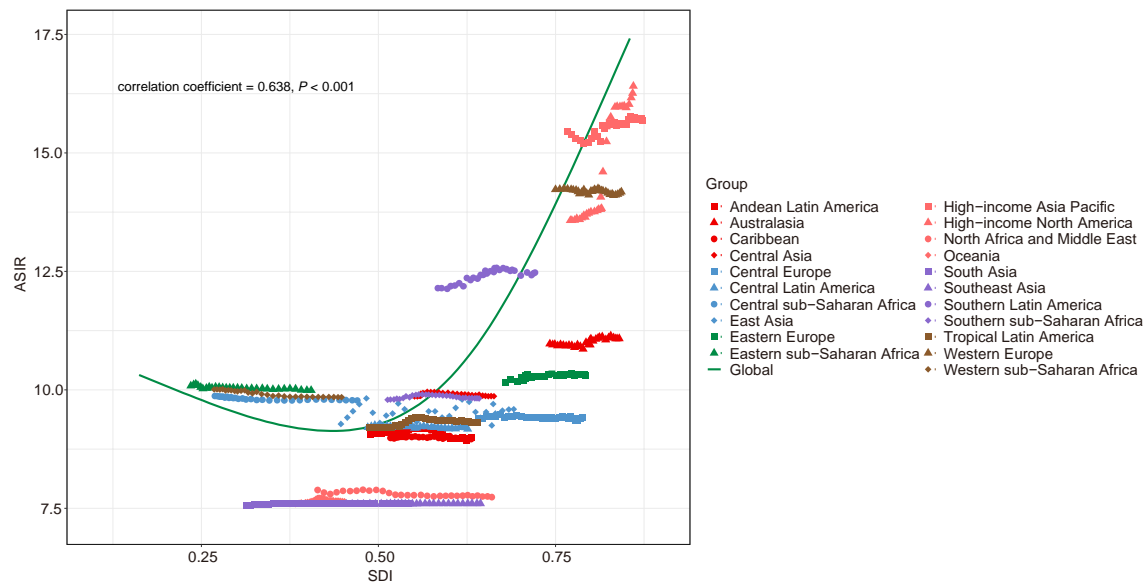

**eFigure 10.** The change trends and correlation of age-standardized disability-adjusted life year (DALY) rate and sociodemographic index (SDI) in 21 regions from 1990 to 2019.

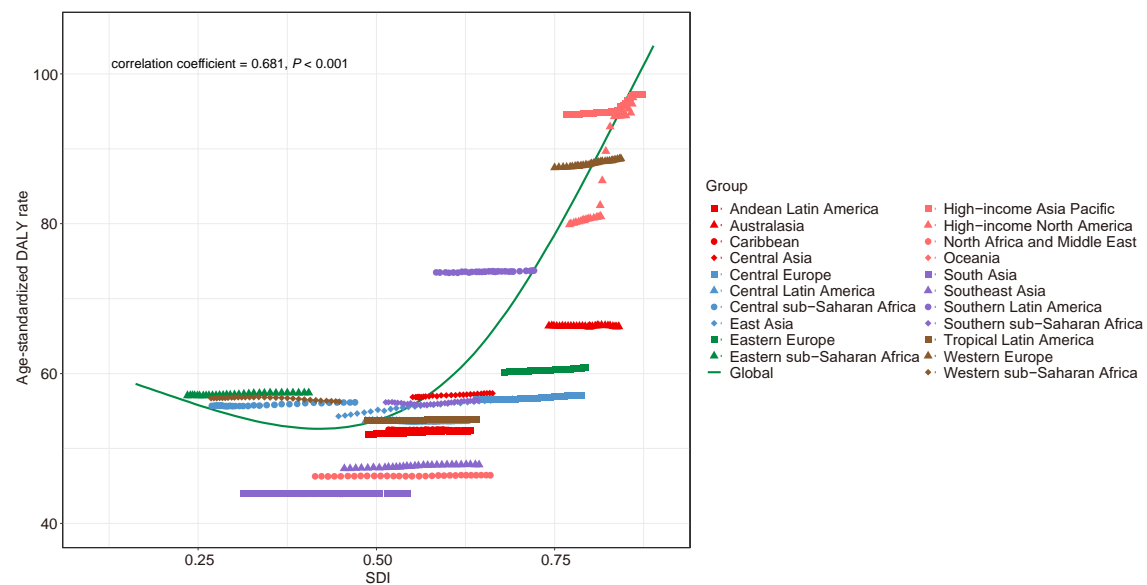

**eTable 1. Number and age-standardized prevalence rate for ASD globally and by SDI group, GBD region and super-region, country, and territory in 1990 and 2019.**

|                                      | Prevalent cases<br>No. (95% UI) |                                 |           | Age-standardized Prevalent rate/100,000<br>No. (95% UI) |                        |           |                           |
|--------------------------------------|---------------------------------|---------------------------------|-----------|---------------------------------------------------------|------------------------|-----------|---------------------------|
|                                      | 1990                            | 2019                            | Change, % | 1990                                                    | 2019                   | Change, % | EAPC<br>No. (95% CI)      |
| <b>Global</b>                        | 20336256<br>(16857367-24222582) | 28324939<br>(23500644-33811271) | 39.3      | 372.8<br>(309.1-444.9)                                  | 369.4<br>(305.9-441.2) | -0.9      | -0.02 (-0.03 to<br>-0.01) |
| High SDI                             | 4319311<br>(3613076-5102134)    | 5484192<br>(4587041-6520432)    | 27.0      | 539.6<br>(451.7-638.4)                                  | 579.3<br>(485.3-684.5) | 7.4       | 0.3 (0.25 to<br>0.35)     |
| High-middle SDI                      | 4665416<br>(3863289-5575606)    | 5520271<br>(4566936-6619212)    | 18.3      | 404.6<br>(334.9-483.3)                                  | 405.4<br>(335.9-485)   | 0.2       | 0.01 (0.01 to<br>0.01)    |
| Middle SDI                           | 5698916<br>(4667746-6901112)    | 7566752<br>(6220224-9144158)    | 32.8      | 319.7<br>(262.7-387.2)                                  | 321.4<br>(264.5-388)   | 0.5       | 0.01 (0 to<br>0.02)       |
| Low-middle SDI                       | 3710774<br>(3057599-4450285)    | 5612896<br>(4621359-6739732)    | 51.3      | 311.5<br>(257.2-373.9)                                  | 312.8<br>(258.2-375.7) | 0.4       | 0.01 (0.01 to<br>0.01)    |
| Low SDI                              | 1931430<br>(1592707-2329440)    | 4125396<br>(3401890-4965501)    | 113.6     | 340.5<br>(280.2-408.3)                                  | 342.2<br>(281.4-410.2) | 0.5       | 0.01 (0.01 to<br>0.02)    |
| <b>High-income North<br/>America</b> | 1435440<br>(1210088-1685566)    | 2185918<br>(1833599-2587355)    | 52.3      | 526.2<br>(443.4-617.9)                                  | 640<br>(537.7-756.4)   | 21.6      | 0.83 (0.69 to<br>0.96)    |
| Canada                               | 159035 (137865-183541)          | 206648 (178807-238417)          | 29.9      | 598.7<br>(519.3-689.9)                                  | 608.1<br>(526.8-696.6) | 1.6       | 0.02 (0.02 to<br>0.03)    |
| Greenland                            | 287 (236-343)                   | 271 (223-324)                   | -5.6      | 505.9<br>(415.4-604.3)                                  | 499.1<br>(409.9-596.5) | -1.3      | -0.04 (-0.04 to<br>-0.03) |
| United States of                     | 1276085                         | 1978964                         | 55.1      | 518.5                                                   | 643.4                  | 24.1      | 0.91 (0.76 to             |

|                                 |                              |                              |      |                        |                        |      |                        |
|---------------------------------|------------------------------|------------------------------|------|------------------------|------------------------|------|------------------------|
| America                         | (1064276-1508544)            | (1648438-2352589)            |      | (432-612.8)            | (535.1-763.6)          |      | 1.07)                  |
| <b>Australasia</b>              | 86986 (72543-103962)         | 119973 (100247-143664)       | 37.9 | 436.8<br>(364.3-521.8) | 436.1<br>(363.8-521.2) | -0.2 | 0 (0 to 0)             |
| Australia                       | 72180 (60086-86864)          | 101374 (84293-121654)        | 40.4 | 436.2<br>(363.2-524.1) | 435.9<br>(362.9-523.7) | -0.1 | 0 (0 to 0)             |
| New Zealand                     | 14806 (12205-17728)          | 18600 (15367-22296)          | 25.6 | 439.9<br>(362.4-527.4) | 437.3<br>(360.3-524.2) | -0.6 | -0.02 (-0.03 to -0.02) |
| <b>High-income Asia Pacific</b> | 1047349<br>(872107-1244347)  | 1078242<br>(895833-1288544)  | 2.9  | 617.8<br>(515-734.7)   | 634.3<br>(528.8-756.7) | 2.7  | 0.1 (0.08 to 0.12)     |
| Brunei Darussalam               | 1558 (1285-1877)             | 2500 (2060-3017)             | 60.5 | 572.6<br>(471.7-689.7) | 569.6<br>(469.2-686.2) | -0.5 | 0 (-0.03 to 0.02)      |
| Japan                           | 783447 (652062-930475)       | 772757 (641073-924194)       | -1.4 | 648.1<br>(540.3-769.3) | 676.5<br>(562.8-805)   | 4.4  | 0.17 (0.14 to 0.19)    |
| Singapore                       | 17923 (14779-21666)          | 31851 (26214-38413)          | 77.7 | 585.1<br>(483.1-704.6) | 588.1<br>(485.4-707.6) | 0.5  | 0.03 (0.01 to 0.06)    |
| Republic of Korea               | 244421 (201800-291106)       | 271135 (224314-324212)       | 10.9 | 540.4<br>(445.7-643.7) | 548.9<br>(452.7-653.7) | 1.6  | 0.04 (0.04 to 0.05)    |
| <b>Western Europe</b>           | 2113126<br>(1773298-2507729) | 2354684<br>(1967645-2791090) | 11.4 | 573.7<br>(482.7-679.9) | 581.3<br>(488.2-686.4) | 1.3  | 0.05 (0.04 to 0.05)    |
| Andorra                         | 316 (258-381)                | 454 (371-550)                | 44.0 | 590.6<br>(483.8-711.7) | 580.4<br>(476.1-699.5) | -1.7 | -0.07 (-0.08 to -0.06) |
| Austria                         | 41437 (34168-49456)          | 46901 (38621-55879)          | 13.2 | 560.3<br>(462.3-667.4) | 567.5<br>(468.3-675.3) | 1.3  | 0.04 (0.03 to 0.04)    |
| Belgium                         | 53520 (44050-64515)          | 60079 (49394-72457)          | 12.3 | 562.1<br>(463.8-675.7) | 563.3<br>(464.7-677.1) | 0.2  | 0.01 (0 to 0.01)       |
| Cyprus                          | 4365 (3617-5221)             | 7032 (5821-8458)             | 61.1 | 565.6<br>(468.6-675.9) | 562.3<br>(465.8-672)   | -0.6 | -0.03 (-0.03 to -0.03) |

|             |                        |                        |      |                        |                        |      |                     |
|-------------|------------------------|------------------------|------|------------------------|------------------------|------|---------------------|
| Denmark     | 21030 (20455-21866)    | 23434 (22774-24341)    | 11.4 | 427.2<br>(415.7-444.2) | 429<br>(417.9-444.9)   | 0.4  | 0.01 (0.01 to 0.01) |
| Finland     | 26433 (21828-31601)    | 28483 (23521-34106)    | 7.8  | 551.2<br>(455.4-658.4) | 557.7<br>(460.9-666.1) | 1.2  | 0.04 (0.04 to 0.04) |
| France      | 250128 (212134-301146) | 281641 (240099-328886) | 12.6 | 449.5<br>(381.8-540.3) | 457.1<br>(390-533.8)   | 1.7  | 0.08 (0.07 to 0.09) |
| Germany     | 425508 (347300-511045) | 446061 (364617-535795) | 4.8  | 563.1<br>(460.3-676.6) | 572.3<br>(467.4-687.2) | 1.6  | 0.04 (0.03 to 0.05) |
| Greece      | 56206 (46638-68031)    | 53309 (44143-64550)    | -5.2 | 562.6<br>(467.1-679.9) | 562.3<br>(466.9-679.7) | -0.1 | -0.01 (-0.02 to 0)  |
| Iceland     | 1417 (1179-1685)       | 1874 (1557-2233)       | 32.2 | 562.8<br>(468.2-669.2) | 566.1<br>(471.1-673.2) | 0.6  | 0.02 (0.01 to 0.03) |
| Ireland     | 21794 (17951-26109)    | 28661 (23570-34412)    | 31.5 | 608.9<br>(501.8-729.1) | 607.3<br>(500.5-727.2) | -0.3 | -0.01 (-0.02 to 0)  |
| Israel      | 25344 (21066-30277)    | 46966 (39011-56164)    | 85.3 | 506.7<br>(420.8-605.6) | 510.4<br>(423.9-610)   | 0.7  | 0.03 (0.03 to 0.03) |
| Italy       | 303941 (252029-361920) | 311271 (257191-371643) | 2.4  | 562.8<br>(467.4-668.6) | 567.9<br>(471.2-675.1) | 0.9  | 0.03 (0.03 to 0.03) |
| Luxembourg  | 2062 (1698-2484)       | 3350 (2755-4039)       | 62.5 | 565.2<br>(465.3-679.9) | 571.4<br>(470.4-687.5) | 1.1  | 0.04 (0.03 to 0.04) |
| Malta       | 2076 (1701-2485)       | 2363 (1926-2842)       | 13.8 | 570<br>(467.2-682.2)   | 578.4<br>(473.9-692.3) | 1.5  | 0.05 (0.05 to 0.05) |
| Netherlands | 90797 (74254-108939)   | 101490 (82817-121694)  | 11.8 | 627.5<br>(513.6-751.9) | 629.6<br>(515.2-754.7) | 0.3  | 0.01 (0.01 to 0.01) |
| Norway      | 19245 (15890-23055)    | 24492 (20161-29291)    | 27.3 | 473.8<br>(392.2-567.2) | 484.4<br>(399.4-577.4) | 2.2  | 0.06 (0.05 to 0.07) |
| Portugal    | 53485 (43883-64100)    | 52895 (43368-63382)    | -1.1 | 546.3                  | 547.8                  | 0.3  | 0 (0 to 0.01)       |

|                               |                            |                        |       |                        |                        |     |                     |
|-------------------------------|----------------------------|------------------------|-------|------------------------|------------------------|-----|---------------------|
|                               |                            |                        |       | (448.2-653.2)          | (449.4-654.9)          |     |                     |
| Spain                         | 216156 (178352-261299)     | 246279 (203164-298473) | 13.9  | 576.4<br>(476.6-698.1) | 579.5<br>(479.2-701.5) | 0.5 | 0.03 (0.02 to 0.04) |
| Sweden                        | 56224 (46912-66743)        | 67658 (56338-80572)    | 20.3  | 690.7<br>(576.1-818.3) | 706.8<br>(589.1-838.5) | 2.3 | 0.1 (0.1 to 0.11)   |
| Switzerland                   | 37401 (30743-45100)        | 46985 (38566-56702)    | 25.6  | 570<br>(468-684.3)     | 573.4<br>(470.7-688.4) | 0.6 | 0.02 (0.01 to 0.03) |
| United Kingdom                | 402206 (334662-476122)     | 470592 (391239-557167) | 17.0  | 730.3<br>(609.3-865.4) | 739.6<br>(617.2-876.3) | 1.3 | 0.05 (0.05 to 0.05) |
| <b>Southern Latin America</b> | 240321 (199640-288082)     | 313298 (260284-376359) | 30.4  | 480.8<br>(399.3-576.6) | 482.5<br>(400.8-579)   | 0.4 | 0.01 (0.01 to 0.01) |
| Argentina                     | 159816 (131719-192285)     | 212154 (174262-255669) | 32.7  | 479.5<br>(394.9-577.2) | 480.5<br>(395.8-578.4) | 0.2 | 0.01 (0.01 to 0.01) |
| Chile                         | 65647 (54771-78632)        | 85390 (70985-102813)   | 30.1  | 484.1<br>(403.9-581.1) | 487.6<br>(406.8-585.1) | 0.7 | 0.07 (0.06 to 0.07) |
| Uruguay                       | 14848 (12244-17879)        | 15738 (12987-18965)    | 6.0   | 481.5<br>(396.9-580)   | 481.4<br>(396.8-579.9) | 0.0 | 0 (0 to 0)          |
| <b>Eastern Europe</b>         | 866526<br>(716655-1038602) | 773320 (638888-927709) | -10.8 | 394.8<br>(326.1-472.8) | 397.3<br>(328.3-476)   | 0.6 | 0.02 (0.02 to 0.02) |
| Belarus                       | 40317 (33163-48418)        | 35148 (28877-42260)    | -12.8 | 396.7<br>(326.7-476)   | 399.6<br>(329.1-479.7) | 0.7 | 0.02 (0.02 to 0.02) |
| Estonia                       | 6031 (4952-7269)           | 4849 (3992-5856)       | -19.6 | 398.7<br>(327.6-479.3) | 404.1<br>(331.8-485.6) | 1.4 | 0.05 (0.05 to 0.06) |
| Latvia                        | 10121 (8346-12162)         | 6943 (5734-8367)       | -31.4 | 397<br>(328-475.9)     | 401<br>(331.4-480.9)   | 1.0 | 0.04 (0.03 to 0.04) |
| Lithuania                     | 14465 (11939-17371)        | 10320 (8542-12425)     | -28.7 | 405.1<br>(334.5-486.4) | 407.8<br>(336.7-489.8) | 0.7 | 0.02 (0.02 to 0.03) |

|                           |                        |                        |       |                        |                        |      |                          |
|---------------------------|------------------------|------------------------|-------|------------------------|------------------------|------|--------------------------|
| Republic of Moldova       | 17444 (14371-21047)    | 13678 (11262-16517)    | -21.6 | 393.2<br>(324-474.5)   | 397.8<br>(327.8-480.1) | 1.2  | 0.04 (0.04 to<br>0.04)   |
| Russian Federation        | 578995 (477809-692806) | 541938 (445878-649451) | -6.4  | 394.2<br>(325.1-471.1) | 396.8<br>(327-474.3)   | 0.7  | 0.02 (0.02 to<br>0.02)   |
| Ukraine                   | 199152 (164228-240709) | 160444 (132414-194047) | -19.4 | 395<br>(325.8-478.2)   | 397.6<br>(327.9-481.2) | 0.7  | 0.02 (0.02 to<br>0.02)   |
| <b>Central Europe</b>     | 445113 (367189-532928) | 393541 (325032-472445) | -11.6 | 370.5<br>(305.8-443.3) | 373.6<br>(308.4-446.9) | 0.8  | 0.03 (0.03 to<br>0.03)   |
| Albania                   | 12735 (10409-15355)    | 9569 (7816-11567)      | -24.9 | 372.8<br>(305.4-450.4) | 370.7<br>(303.6-447.7) | -0.6 | -0.01 (-0.03 to<br>0.01) |
| Bosnia and<br>Herzegovina | 17190 (14030-20507)    | 11605 (9486-13871)     | -32.5 | 378.7<br>(308.7-451.3) | 378.6<br>(308.6-451.2) | 0.0  | 0.02 (0.01 to<br>0.03)   |
| Bulgaria                  | 30584 (25052-36891)    | 23271 (19071-28093)    | -23.9 | 368.3<br>(301.8-444.8) | 370.3<br>(303.4-447.2) | 0.5  | 0.02 (0.02 to<br>0.03)   |
| Croatia                   | 17750 (14472-21407)    | 14731 (12002-17801)    | -17.0 | 375.9<br>(306.8-453.3) | 378.6<br>(309.1-456.5) | 0.7  | 0.03 (0.03 to<br>0.03)   |
| Czechia                   | 37349 (30385-45341)    | 37343 (30422-45457)    | 0.0   | 375.6<br>(305-455.6)   | 379.7<br>(308.4-460.6) | 1.1  | 0.04 (0.04 to<br>0.04)   |
| Hungary                   | 36905 (30101-44569)    | 32923 (26742-39867)    | -10.8 | 371.4<br>(303.9-448.7) | 373.7<br>(305.8-451.4) | 0.6  | 0.02 (0.02 to<br>0.03)   |
| North Macedonia           | 7579 (6209-9125)       | 7756 (6357-9350)       | 2.3   | 376<br>(308.1-452.4)   | 378.9<br>(310.4-456)   | 0.8  | 0.03 (0.03 to<br>0.04)   |
| Montenegro                | 2341 (1913-2844)       | 2211 (1804-2691)       | -5.5  | 375.6<br>(306.7-456.2) | 377.4<br>(308.3-458.4) | 0.5  | 0.02 (0.01 to<br>0.02)   |
| Poland                    | 139026 (113838-166355) | 132648 (108511-158839) | -4.6  | 371.1<br>(304.4-443.9) | 373.9<br>(306.6-447.3) | 0.8  | 0.03 (0.03 to<br>0.03)   |
| Romania                   | 83328 (68094-99597)    | 64616 (52833-77194)    | -22.5 | 364.2                  | 366.4                  | 0.6  | 0.02 (0.02 to            |

|                     |                        |                        |       |                        |                        |      |                           |
|---------------------|------------------------|------------------------|-------|------------------------|------------------------|------|---------------------------|
|                     |                        |                        |       | (297.8-435.2)          | (299.7-437.8)          |      | 0.03)                     |
| Serbia              | 33778 (27755-40676)    | 30593 (25051-36829)    | -9.4  | 368.2<br>(301.8-443)   | 375.4<br>(307.5-451.8) | 2.0  | 0.07 (0.06 to<br>0.08)    |
| Slovakia            | 19345 (15894-23326)    | 18986 (15576-22972)    | -1.9  | 371.6<br>(304.8-447.8) | 374.6<br>(307.4-451.2) | 0.8  | 0.03 (0.03 to<br>0.03)    |
| Slovenia            | 7203 (5861-8689)       | 7288 (5927-8847)       | 1.2   | 376.7<br>(306.5-454.6) | 382.7<br>(311.5-461.9) | 1.6  | 0.06 (0.06 to<br>0.06)    |
| <b>Central Asia</b> | 268361 (220526-321320) | 354787 (291432-426875) | 32.2  | 371.7<br>(305.9-446.9) | 374.8<br>(308-450.9)   | 0.8  | -0.01 (-0.02 to<br>0)     |
| Armenia             | 13214 (10782-15982)    | 11051 (9025-13411)     | -16.4 | 379.9<br>(310-459.1)   | 383.1<br>(312.5-462.8) | 0.8  | 0.04 (0.03 to<br>0.04)    |
| Azerbaijan          | 28268 (23283-33950)    | 38492 (31577-46355)    | 36.2  | 372.2<br>(306.3-447.8) | 379.8<br>(312.2-456.6) | 2.0  | 0.08 (0.08 to<br>0.09)    |
| Georgia             | 20312 (16764-24315)    | 13085 (10782-15660)    | -35.6 | 374.3<br>(309.3-447.9) | 380.8<br>(314.6-455.9) | 1.7  | 0.23 (-0.6 to<br>1.07)    |
| Kazakhstan          | 62025 (50987-74754)    | 68096 (55993-82158)    | 9.8   | 369.4<br>(303.8-445.8) | 371<br>(305.1-447.5)   | 0.4  | 0.01 (0.01 to<br>0.02)    |
| Kyrgyzstan          | 17298 (14149-20762)    | 25055 (20541-30100)    | 44.8  | 370.8<br>(304.2-446)   | 373.4<br>(306.5-449)   | 0.7  | 0.02 (0.02 to<br>0.02)    |
| Mongolia            | 8537 (6964-10288)      | 12773 (10410-15404)    | 49.6  | 372<br>(303.3-448.5)   | 370.4<br>(301.9-446.4) | -0.4 | -0.01 (-0.02 to<br>-0.01) |
| Tajikistan          | 21408 (17670-25832)    | 37244 (30699-45012)    | 74.0  | 374<br>(307.3-451.3)   | 377.3<br>(309.9-455.1) | 0.9  | 0.03 (0.03 to<br>0.04)    |
| Turkmenistan        | 14627 (11979-17596)    | 19570 (16061-23615)    | 33.8  | 370.8<br>(304.3-447.7) | 378.8<br>(310.7-457.4) | 2.2  | 0.08 (0.08 to<br>0.08)    |
| Uzbekistan          | 82672 (67302-100061)   | 129421 (105487-156624) | 56.5  | 371.8<br>(302.7-450)   | 374.2<br>(304.7-453)   | 0.6  | 0.02 (0.02 to<br>0.02)    |

|                                    |                        |                         |       |                     |                     |      |                        |
|------------------------------------|------------------------|-------------------------|-------|---------------------|---------------------|------|------------------------|
| <b>Central Latin America</b>       | 608677 (502158-726427) | 875348 (720122-1047034) | 43.8  | 351.7 (289.6-420.6) | 350.9 (288.8-419.5) | -0.2 | 0.03 (0.03 to 0.04)    |
| Colombia                           | 114322 (92774-138003)  | 157698 (127974-191011)  | 37.9  | 336.1 (272.8-407)   | 336.2 (272.8-407)   | 0.0  | 0.13 (0.13 to 0.14)    |
| Costa Rica                         | 10954 (8909-13210)     | 15855 (12920-19155)     | 44.7  | 346 (282.2-417.7)   | 342.5 (279.2-413.5) | -1.0 | 0.04 (0.04 to 0.04)    |
| El Salvador                        | 18519 (15065-22377)    | 20617 (16730-24970)     | 11.3  | 331.8 (269.3-401.6) | 327.9 (266-396.9)   | -1.2 | -0.04 (-0.05 to -0.04) |
| Guatemala                          | 28425 (23307-33974)    | 60922 (49883-72922)     | 114.3 | 332.4 (271.6-397.7) | 329 (268.8-393.5)   | -1.0 | -0.04 (-0.04 to -0.03) |
| Honduras                           | 16928 (13765-20452)    | 33751 (27538-40717)     | 99.4  | 333.6 (272.7-402.1) | 330.9 (270.6-398.8) | -0.8 | -0.03 (-0.04 to -0.03) |
| Mexico                             | 334563 (275855-398323) | 462735 (381484-554085)  | 38.3  | 371 (306-443.6)     | 371.6 (306.3-444.9) | 0.2  | 0.01 (0 to 0.01)       |
| Nicaragua                          | 14049 (11455-16835)    | 22505 (18391-27014)     | 60.2  | 335 (273.5-401.9)   | 336.9 (275.2-404.2) | 0.6  | 0.02 (0.02 to 0.02)    |
| Panama                             | 8476 (6863-10164)      | 14208 (11515-17068)     | 67.6  | 342.7 (277.8-411.6) | 342.2 (277.4-411)   | -0.1 | -0.01 (-0.01 to -0.01) |
| Venezuela (Bolivarian Republic of) | 62442 (51293-75524)    | 87057 (71536-105438)    | 39.4  | 315.2 (259.3-381.3) | 314.3 (258.5-380.3) | -0.3 | 0.01 (0 to 0.02)       |
| <b>Andean Latin America</b>        | 136708 (112528-164539) | 219156 (180811-263070)  | 60.3  | 340.4 (280.9-408.5) | 342.1 (282.4-410.5) | 0.5  | 0.02 (0.02 to 0.02)    |
| Bolivia (Plurinational State of)   | 23071 (18860-27930)    | 41997 (34422-50775)     | 82.0  | 337.7 (277-408.4)   | 340.8 (279.6-412.1) | 0.9  | 0.03 (0.03 to 0.04)    |
| Ecuador                            | 35854 (29385-43179)    | 60491 (49658-72945)     | 68.7  | 340 (279-410.4)     | 340.5 (279.4-411.1) | 0.1  | 0 (0 to 0.01)          |
| Peru                               | 77783 (63705-93582)    | 116668 (95667-140645)   | 50.0  | 341.2               | 343.4               | 0.6  | 0.03 (0.03 to 0.03)    |



|                     |                        |                        |       |                        |                        |      |                        |
|---------------------|------------------------|------------------------|-------|------------------------|------------------------|------|------------------------|
|                     |                        |                        |       | (279.7-411.1)          | (281.5-413.7)          |      | 0.03)                  |
| <b>Caribbean</b>    | 124630 (102831-149922) | 159960 (132108-192303) | 28.3  | 344.2<br>(284-414.1)   | 343.8<br>(283.7-413.6) | -0.1 | 0.05 (0.04 to 0.07)    |
| Antigua and Barbuda | 212 (173-256)          | 297 (243-359)          | 40.1  | 342.7<br>(280.3-414.1) | 346.1<br>(283.1-418.2) | 1.0  | 0.05 (0.03 to 0.07)    |
| Bahamas             | 902 (740-1094)         | 1250 (1029-1516)       | 38.5  | 339.3<br>(279.6-411.7) | 339.1<br>(279.5-411.5) | -0.1 | -0.01 (-0.01 to 0)     |
| Barbados            | 866 (716-1040)         | 966 (797-1168)         | 11.5  | 344.3<br>(284.4-413.3) | 346.8<br>(286.5-416.1) | 0.7  | 0.02 (0.02 to 0.02)    |
| Belize              | 678 (556-816)          | 1427 (1168-1715)       | 110.4 | 343.6<br>(281.2-413.2) | 340.6<br>(278.7-409.7) | -0.9 | -0.03 (-0.04 to -0.03) |
| Bermuda             | 204 (165-246)          | 206 (167-248)          | 1.0   | 349.1<br>(283.5-421.3) | 350.4<br>(284.5-422.9) | 0.4  | 0.01 (0 to 0.02)       |
| Cuba                | 38184 (30996-46289)    | 37585 (30583-45647)    | -1.6  | 352.9<br>(286.5-428.1) | 353.7<br>(287.2-429.1) | 0.2  | 0.01 (0.01 to 0.01)    |
| Dominica            | 260 (212-313)          | 231 (189-278)          | -11.0 | 343.4<br>(279.8-413.3) | 347.3<br>(283.3-417.8) | 1.1  | 0.04 (0.04 to 0.04)    |
| Dominican Republic  | 25579 (20782-30823)    | 37535 (30457-45299)    | 46.7  | 337.5<br>(274-407.5)   | 342<br>(277.6-412.7)   | 1.3  | 0.06 (0.05 to 0.07)    |
| Grenada             | 305 (248-368)          | 356 (289-430)          | 16.7  | 343.5<br>(279.7-415.2) | 350.6<br>(285.5-424)   | 2.1  | 0.08 (0.07 to 0.09)    |
| Guyana              | 2742 (2252-3306)       | 2637 (2170-3181)       | -3.8  | 338<br>(278.4-408.1)   | 338.6<br>(278.9-408.7) | 0.2  | 0 (0 to 0.01)          |
| Haiti               | 22542 (18454-27022)    | 43111 (35312-51694)    | 91.3  | 333.6<br>(273-400.1)   | 333.8<br>(273.1-400.3) | 0.1  | 0 (0 to 0)             |
| Jamaica             | 8436 (6918-10181)      | 9649 (7926-11614)      | 14.4  | 345.5<br>(283.5-415.7) | 348.3<br>(285.8-419.2) | 0.8  | 0.03 (0.03 to 0.03)    |

|                                       |                              |                              |       |                        |                        |      |                        |
|---------------------------------------|------------------------------|------------------------------|-------|------------------------|------------------------|------|------------------------|
| Puerto Rico                           | 12526 (10242-15081)          | 11247 (9190-13608)           | -10.2 | 346.7<br>(283.6-417.4) | 347.8<br>(284.4-418.7) | 0.3  | 0.01 (0.01 to 0.02)    |
| Saint Lucia                           | 490 (400-589)                | 581 (474-700)                | 18.6  | 339.9<br>(276.9-408.8) | 345.4<br>(281.7-415.5) | 1.6  | 0.06 (0.06 to 0.06)    |
| Saint Vincent and the Grenadines      | 395 (321-475)                | 383 (311-461)                | -3.0  | 342.4<br>(277.9-412.2) | 347.1<br>(281.4-417.7) | 1.4  | 0.04 (0.04 to 0.05)    |
| Suriname                              | 1370 (1128-1659)             | 1939 (1596-2348)             | 41.5  | 342<br>(281.3-414.1)   | 340.7<br>(280.2-412.6) | -0.4 | -0.01 (-0.01 to -0.01) |
| Trinidad and Tobago                   | 4276 (3486-5177)             | 4611 (3760-5611)             | 7.8   | 345<br>(281.8-418.1)   | 346.7<br>(283.2-420.2) | 0.5  | 0.02 (0.02 to 0.02)    |
| United States Virgin Islands          | 368 (303-444)                | 334 (274-403)                | -9.3  | 343.5<br>(282.6-414.1) | 343.9<br>(282.9-414.6) | 0.1  | 0.01 (0 to 0.02)       |
| <b>Tropical Latin America</b>         | 563007 (465390-674324)       | 774446 (638700-930842)       | 37.6  | 353.9<br>(292-425.4)   | 353.9<br>(292-425.3)   | 0.0  | 0 (0 to 0)             |
| Brazil                                | 547893 (452381-656204)       | 749431 (618422-900974)       | 36.8  | 353.9<br>(292-425.4)   | 353.8<br>(291.9-425.2) | 0.0  | 0 (0 to 0)             |
| Paraguay                              | 15114 (12353-18237)          | 25014 (20465-30198)          | 65.5  | 354.9<br>(290.3-428.7) | 356.5<br>(291.7-430.6) | 0.5  | 0.02 (0.02 to 0.02)    |
| <b>East Asia</b>                      | 4412839<br>(3624038-5309093) | 5098806<br>(4206229-6150048) | 15.5  | 353.5<br>(290.3-425.4) | 367.8<br>(304.4-441.9) | 4.0  | 0.13 (0.12 to 0.14)    |
| China                                 | 4313669<br>(3540479-5189318) | 4985784<br>(4111846-6016905) | 15.6  | 357.7<br>(293.6-430.7) | 372.3<br>(307.5-447.6) | 4.1  | 0.02 (0.01 to 0.02)    |
| Democratic People's Republic of Korea | 54195 (44014-65478)          | 66019 (53571-79704)          | 21.8  | 250.8<br>(203.4-302.9) | 261.4<br>(212.2-315.9) | 4.2  | 0.16 (0.15 to 0.16)    |
| Taiwan (province of China)            | 44975 (38172-53467)          | 47004 (39746-55779)          | 4.5   | 218.2<br>(185.2-259.1) | 215.8<br>(183.2-256.4) | -1.1 | -0.04 (-0.04 to -0.04) |
| <b>Southeast Asia</b>                 | 1519341                      | 2097143                      | 38.0  | 310.5                  | 312.5                  | 0.6  | 0.02 (0.02 to 0.02)    |

|                                     |                        |                        |       |                        |                        |      |                           |
|-------------------------------------|------------------------|------------------------|-------|------------------------|------------------------|------|---------------------------|
|                                     | (1253044-1824857)      | (1729612-2515054)      |       | (256.1-373.2)          | (257.7-374.4)          |      | 0.03)                     |
| Cambodia                            | 33866 (27652-41230)    | 52300 (42620-63668)    | 54.4  | 299.7<br>(244.8-366)   | 307.1<br>(250.9-375.2) | 2.5  | 0.14 (0.14 to<br>0.14)    |
| Indonesia                           | 598898 (493295-717466) | 804573 (662785-963425) | 34.3  | 308.7<br>(254.7-370.1) | 310.3<br>(255.9-371.4) | 0.5  | 0.02 (0.02 to<br>0.02)    |
| Lao People's<br>Democratic Republic | 13577 (11165-16389)    | 22914 (18842-27688)    | 68.8  | 305.4<br>(250.8-369.2) | 310.2<br>(254.6-375.1) | 1.6  | 0.05 (0.05 to<br>0.06)    |
| Malaysia                            | 58963 (48156-70729)    | 101613 (83064-122070)  | 72.3  | 319.6<br>(261-383.9)   | 324<br>(264.7-389.3)   | 1.4  | 0.05 (0.05 to<br>0.05)    |
| Maldives                            | 761 (618-919)          | 1761 (1431-2130)       | 131.5 | 324.9<br>(264.3-393.1) | 343.9<br>(279.4-415.9) | 5.8  | 0.2 (0.14 to<br>0.26)     |
| Mauritius                           | 3600 (2956-4333)       | 3886 (3186-4688)       | 8.0   | 318.7<br>(261.7-383.1) | 319.1<br>(262-383.6)   | 0.1  | 0.01 (0 to<br>0.01)       |
| Myanmar                             | 133365 (108348-160377) | 167622 (136792-201441) | 25.7  | 307.9<br>(251.2-369.7) | 304.7<br>(248.6-365.9) | -1.0 | -0.04 (-0.04 to<br>-0.04) |
| Philippines                         | 210504 (173169-252631) | 363296 (299490-436981) | 72.6  | 313.9<br>(258.7-377.4) | 315.4<br>(259.9-379.3) | 0.5  | 0.01 (0.01 to<br>0.02)    |
| Sri Lanka                           | 57641 (47138-69538)    | 68402 (56011-82745)    | 18.7  | 325.4<br>(266.3-393.4) | 320.6<br>(262.3-387.2) | -1.5 | -0.05 (-0.06 to<br>-0.05) |
| Seychelles                          | 238 (194-285)          | 325 (265-390)          | 36.8  | 317.2<br>(258.6-380.5) | 325<br>(265.2-389.8)   | 2.5  | 0.11 (0.09 to<br>0.12)    |
| Thailand                            | 182157 (148520-219506) | 204477 (166247-246494) | 12.3  | 311.2<br>(253.3-375.6) | 312.1<br>(254-376.7)   | 0.3  | 0.01 (0.01 to<br>0.02)    |
| Timor-Leste                         | 2647 (2163-3192)       | 4381 (3587-5284)       | 65.5  | 316.8<br>(260-381.7)   | 313.5<br>(257.3-377.9) | -1.0 | -0.03 (-0.04 to<br>-0.02) |
| Viet Nam                            | 221106 (180172-267112) | 298844 (244316-362011) | 35.2  | 308.3<br>(252.3-372.7) | 314.9<br>(257.8-380.6) | 2.1  | 0.08 (0.07 to<br>0.08)    |

|                                     |                     |                     |       |                        |                        |      |                        |
|-------------------------------------|---------------------|---------------------|-------|------------------------|------------------------|------|------------------------|
| <b>Oceania</b>                      | 19903 (16274-23989) | 40114 (32728-48523) | 101.5 | 290<br>(236.8-350.4)   | 289<br>(235.5-349)     | -0.3 | -0.01 (-0.01 to 0)     |
| American Samoa                      | 150 (123-183)       | 164 (134-199)       | 9.1   | 295.2<br>(241.5-359)   | 291.8<br>(238.6-354.9) | -1.2 | -0.05 (-0.05 to -0.04) |
| Micronesia<br>(Federated States of) | 323 (261-390)       | 302 (243-364)       | -6.6  | 289.4<br>(234.1-349)   | 288<br>(232.8-347.4)   | -0.5 | -0.01 (-0.02 to 0)     |
| Fiji                                | 2305 (1903-2762)    | 2665 (2204-3199)    | 15.6  | 289.3<br>(239.4-347.4) | 289.2<br>(239.3-347.3) | 0.0  | 0 (0 to 0.01)          |
| Guam                                | 424 (345-516)       | 500 (407-609)       | 17.9  | 300.1<br>(244-365.2)   | 296.3<br>(240.7-360.6) | -1.3 | -0.04 (-0.06 to -0.01) |
| Kiribati                            | 222 (181-267)       | 348 (283-419)       | 56.7  | 281.5<br>(230-338.9)   | 279.9<br>(228.7-337)   | -0.6 | -0.01 (-0.02 to -0.01) |
| Marshall Islands                    | 143 (117-173)       | 169 (138-204)       | 18.3  | 288.9<br>(236.4-350.4) | 289.4<br>(236.8-351.1) | 0.2  | 0.01 (0.01 to 0.01)    |
| Northern Mariana<br>Islands         | 141 (114-170)       | 123 (99-148)        | -12.8 | 303.1<br>(245.7-366.1) | 300.1<br>(243.3-362.3) | -1.0 | -0.02 (-0.07 to 0.03)  |
| Papua New Guinea                    | 12574 (10206-15269) | 29944 (24310-36372) | 138.1 | 289.2<br>(235.3-351.9) | 289<br>(235.1-351.6)   | -0.1 | 0 (0 to 0.01)          |
| Samoa                               | 513 (419-620)       | 641 (523-773)       | 25.0  | 296 (241-357)          | 294<br>(239.4-354.8)   | -0.7 | -0.02 (-0.02 to -0.02) |
| Solomon Islands                     | 1065 (874-1290)     | 1996 (1639-2418)    | 87.4  | 292.2<br>(240-353.2)   | 288.4<br>(236.9-348.6) | -1.3 | -0.05 (-0.05 to -0.05) |
| Tonga                               | 295 (240-357)       | 303 (247-366)       | 2.7   | 287.8<br>(234-348.5)   | 287.2<br>(233.4-347.7) | -0.2 | -0.01 (-0.02 to 0)     |
| Vanuatu                             | 469 (380-566)       | 884 (718-1068)      | 88.7  | 290.9<br>(235.8-350.2) | 287.8<br>(233.2-346.4) | -1.1 | -0.04 (-0.04 to -0.04) |
| <b>North Africa and</b>             | 1105582             | 1879528             | 70.0  | 303.5                  | 304.4                  | 0.3  | 0.01 (0.01 to          |

|                            |                        |                        |       |                        |                        |      |                           |
|----------------------------|------------------------|------------------------|-------|------------------------|------------------------|------|---------------------------|
| <b>Middle East</b>         | (911505-1326857)       | (1550850-2261649)      |       | (250.4-365.5)          | (251.2-366.1)          |      | 0.01)                     |
| Afghanistan                | 34339 (27895-41484)    | 119198 (96727-143892)  | 247.1 | 280.9<br>(228.3-340.4) | 287.1<br>(233.2-347.9) | 2.2  | 0.05 (0.04 to<br>0.06)    |
| Algeria                    | 77704 (63511-93280)    | 122382 (100311-147314) | 57.5  | 290<br>(237.6-349)     | 290.9<br>(238.3-350)   | 0.3  | 0.01 (0.01 to<br>0.01)    |
| Bahrain                    | 1668 (1351-2021)       | 4631 (3740-5630)       | 177.6 | 313.8<br>(253.7-379.9) | 316.6<br>(255.9-382.9) | 0.9  | 0.08 (0.06 to<br>0.11)    |
| Egypt                      | 169967 (138456-206156) | 296910 (242086-359990) | 74.7  | 289.5<br>(235.8-350.8) | 292.2<br>(238-353.9)   | 0.9  | 0.03 (0.03 to<br>0.04)    |
| Iran (Islamic Republic of) | 224822 (185065-268769) | 310410 (256980-369841) | 38.1  | 364.3<br>(299.8-437.5) | 370.3<br>(306.8-441.4) | 1.6  | 0.03 (0.01 to<br>0.04)    |
| Iraq                       | 54051 (43955-65198)    | 125447 (101636-151344) | 132.1 | 286.3<br>(231.5-345.3) | 286.8<br>(231.9-345.9) | 0.2  | -0.01 (-0.01 to<br>0)     |
| Jordan                     | 11973 (9798-14566)     | 35886 (29427-43705)    | 199.7 | 296.9<br>(243.5-360.9) | 299.9<br>(246-364.2)   | 1.0  | 0.04 (0.02 to<br>0.05)    |
| Kuwait                     | 5741 (4670-6974)       | 13397 (10887-16293)    | 133.4 | 315.9<br>(256.7-383.9) | 305<br>(248-370.1)     | -3.5 | -0.13 (-0.17 to<br>-0.09) |
| Lebanon                    | 10333 (8401-12523)     | 15555 (12634-18884)    | 50.5  | 303.7<br>(246.8-368.6) | 302.3<br>(245.6-367)   | -0.5 | -0.02 (-0.03 to<br>-0.01) |
| Libya                      | 13001 (10677-15797)    | 19233 (15779-23362)    | 47.9  | 290.8<br>(238.9-353.2) | 286.5<br>(235.2-347.9) | -1.5 | -0.02 (-0.03 to<br>0)     |
| Morocco                    | 75984 (62182-91713)    | 103372 (84720-124834)  | 36.0  | 285.6<br>(234-344.9)   | 287.5<br>(235.6-347.2) | 0.7  | 0.03 (0.02 to<br>0.03)    |
| Oman                       | 6125 (4990-7406)       | 14594 (11942-17659)    | 138.3 | 298.4<br>(244.2-360.6) | 303<br>(248.2-366)     | 1.5  | 0.09 (0.03 to<br>0.16)    |
| Palestine                  | 6473 (5273-7816)       | 15181 (12372-18351)    | 134.5 | 288.6<br>(235.1-349.3) | 292.1<br>(237.8-353.6) | 1.2  | 0.03 (0.02 to<br>0.04)    |

|                      |                              |                              |       |                        |                        |      |                        |
|----------------------|------------------------------|------------------------------|-------|------------------------|------------------------|------|------------------------|
| Qatar                | 1552 (1275-1865)             | 10343 (8473-12465)           | 566.6 | 332.5<br>(273.6-400.6) | 344.7<br>(283.2-415.7) | 3.7  | 0.2 (0.16 to 0.25)     |
| Saudi Arabia         | 52063 (42293-62728)          | 112394 (91444-136141)        | 115.9 | 310<br>(252.4-374.5)   | 310.9<br>(253.2-375.6) | 0.3  | 0.02 (0 to 0.04)       |
| Sudan                | 61796 (50219-74357)          | 123282 (100061-148317)       | 99.5  | 285.4<br>(232.8-343)   | 286.7<br>(233.9-344.7) | 0.5  | 0.02 (0.01 to 0.02)    |
| Syrian Arab Republic | 40283 (32933-48754)          | 41510 (33817-50467)          | 3.0   | 292<br>(237.9-355.1)   | 283.9<br>(231.3-345.4) | -2.8 | -0.09 (-0.13 to -0.05) |
| Tunisia              | 25671 (21007-30985)          | 32915 (26833-39903)          | 28.2  | 291.8<br>(238.2-353.8) | 290.5<br>(237.2-352.2) | -0.4 | -0.02 (-0.02 to -0.02) |
| Turkey               | 181816 (148231-221243)       | 233196 (190172-283292)       | 28.3  | 292.6<br>(238.9-355)   | 293.3<br>(239.4-355.8) | 0.2  | 0.01 (0 to 0.01)       |
| United Arab Emirates | 6464 (5300-7796)             | 31944 (26250-38509)          | 394.2 | 328.5<br>(269.7-397.5) | 331.2<br>(271.9-400.8) | 0.8  | 0.08 (0.04 to 0.11)    |
| Yemen                | 43014 (35298-51808)          | 95839 (78745-115683)         | 122.8 | 285.9<br>(234.4-346.8) | 286<br>(234.6-347)     | 0.0  | -0.01 (-0.01 to 0)     |
| <b>South Asia</b>    | 3370030<br>(2767916-4062245) | 5310541<br>(4355785-6406808) | 57.6  | 291.9<br>(240.1-351.9) | 290<br>(238.4-349.2)   | -0.7 | -0.03 (-0.03 to -0.03) |
| Bangladesh           | 345633 (282283-413375)       | 468932 (382537-561058)       | 35.7  | 298.4<br>(243.6-357.2) | 292.3<br>(238.4-349.6) | -2.0 | -0.09 (-0.1 to -0.08)  |
| Bhutan               | 1966 (1606-2376)             | 2286 (1869-2764)             | 16.3  | 300.7<br>(245.7-363.3) | 299.5<br>(244.7-362)   | -0.4 | 0 (-0.01 to 0.01)      |
| India                | 2599711<br>(2124879-3139560) | 4046199<br>(3320489-4881900) | 55.6  | 289.8<br>(238.3-349.3) | 288.5<br>(237.1-347.9) | -0.4 | -0.02 (-0.02 to -0.02) |
| Nepal                | 61112 (49728-73633)          | 89803 (73155-108122)         | 46.9  | 294.4<br>(239.8-354.3) | 288.6<br>(235-347.6)   | -2.0 | -0.08 (-0.09 to -0.07) |
| Pakistan             | 361607 (294461-434003)       | 703321 (572848-844803)       | 94.5  | 301.5                  | 298.1                  | -1.1 | -0.04 (-0.04 to        |

|                                    |                        |                              |       |                        |                        |      |                        |
|------------------------------------|------------------------|------------------------------|-------|------------------------|------------------------|------|------------------------|
|                                    |                        |                              |       | (246.8-364)            | (244.1-359.3)          |      | -0.04)                 |
| <b>Southern sub-Saharan Africa</b> | 204885 (167918-245329) | 298595 (244999-358553)       | 45.7  | 369.4<br>(302.9-444.8) | 371.6<br>(304.9-447.7) | 0.6  | 0.02 (0.02 to 0.03)    |
| Botswana                           | 5115 (4193-6205)       | 8965 (7321-10894)            | 75.3  | 366.2<br>(298.4-444.2) | 372<br>(303.6-451.4)   | 1.6  | 0.05 (0.05 to 0.05)    |
| Lesotho                            | 7075 (5763-8518)       | 8031 (6523-9687)             | 13.5  | 367.9<br>(299.6-443.7) | 369.5<br>(300.8-445.7) | 0.4  | 0.01 (0 to 0.02)       |
| Namibia                            | 5547 (4533-6708)       | 9228 (7544-11175)            | 66.4  | 369.4<br>(301.9-447.1) | 367.9<br>(300.7-445.1) | -0.4 | -0.01 (-0.01 to -0.01) |
| South Africa                       | 142806 (117633-171815) | 209688 (172748-251435)       | 46.8  | 369.9<br>(305.2-443.4) | 373.6<br>(307.8-448.3) | 1.0  | 0.04 (0.03 to 0.05)    |
| Eswatini                           | 3182 (2627-3840)       | 4428 (3652-5345)             | 39.1  | 361.6<br>(297.9-436.5) | 367<br>(302.5-442.8)   | 1.5  | 0.05 (0.04 to 0.06)    |
| Zimbabwe                           | 41161 (33414-49518)    | 58254 (47289-70070)          | 41.5  | 368.9<br>(299.6-443.8) | 364.4<br>(295.9-438.7) | -1.2 | -0.05 (-0.05 to -0.04) |
| <b>Western sub-Saharan Africa</b>  | 769073 (634591-917695) | 1807743<br>(1490123-2160089) | 135.1 | 375.3<br>(309.6-449)   | 370.6<br>(305.5-443.3) | -1.3 | -0.05 (-0.06 to -0.04) |
| Benin                              | 19417 (15867-23477)    | 50508 (41289-61100)          | 160.1 | 367.3<br>(301.8-442.6) | 370.3<br>(304.2-446.2) | 0.8  | 0.02 (0.02 to 0.03)    |
| Burkina Faso                       | 37889 (31176-45491)    | 89977 (74066-107956)         | 137.5 | 364.5<br>(299.6-438.4) | 366.7<br>(301.3-441.1) | 0.6  | 0.02 (0.02 to 0.02)    |
| Cameroon                           | 41455 (34051-50085)    | 115568 (94893-139756)        | 178.8 | 370.6<br>(305-447.7)   | 373<br>(307-450.6)     | 0.6  | 0.09 (0.08 to 0.09)    |
| Cabo Verde                         | 1377 (1122-1666)       | 2179 (1779-2638)             | 58.2  | 366<br>(299.1-443.1)   | 380.4<br>(311-460.6)   | 3.9  | 0.02 (0.01 to 0.02)    |
| Chad                               | 23940 (19399-28790)    | 66431 (53795-79878)          | 177.5 | 367.1<br>(299.5-443.5) | 373.5<br>(304.8-450.9) | 1.7  | 0 (0 to 0.01)          |

|                          |                        |                            |       |                        |                        |      |                           |
|--------------------------|------------------------|----------------------------|-------|------------------------|------------------------|------|---------------------------|
| Côte d'Ivoire            | 49757 (40807-59815)    | 105148 (86276-126365)      | 111.3 | 379<br>(309.3-455.4)   | 379.7<br>(309.9-456.1) | 0.2  | -0.04 (-0.05 to<br>-0.04) |
| Gambia                   | 3999 (3260-4806)       | 8870 (7224-10669)          | 121.8 | 376.3<br>(305.7-453.3) | 371.9<br>(302.2-447.6) | -1.2 | -0.05 (-0.06 to<br>-0.04) |
| Ghana                    | 59991 (49415-72498)    | 122115 (100698-147528)     | 103.6 | 372.5<br>(306.2-448.2) | 368.7<br>(303.1-444)   | -1.0 | -0.04 (-0.05 to<br>-0.04) |
| Guinea                   | 24422 (19896-29283)    | 49909 (40602-59849)        | 104.4 | 369.2<br>(300.9-443.8) | 368.1<br>(300-442.7)   | -0.3 | -0.02 (-0.02 to<br>-0.01) |
| Guinea-Bissau            | 3992 (3240-4807)       | 7475 (6068-9001)           | 87.2  | 365.3<br>(295.6-441.1) | 366.2<br>(296.3-442.2) | 0.2  | 0 (0 to 0.01)             |
| Liberia                  | 7724 (6293-9299)       | 18928 (15416-22793)        | 145.1 | 370.8<br>(302.4-448)   | 375.6<br>(306.1-453.7) | 1.3  | 0.05 (0.04 to<br>0.06)    |
| Mali                     | 34524 (28196-41494)    | 88081 (71928-105777)       | 155.1 | 370.3<br>(303.3-445.4) | 373.3<br>(305.6-449)   | 0.8  | 0.03 (0.02 to<br>0.03)    |
| Mauritania               | 8266 (6767-9997)       | 15800 (12936-19106)        | 91.2  | 374.6<br>(306.6-453)   | 374.4<br>(306.5-452.8) | -0.1 | -0.01 (-0.01 to<br>-0.01) |
| Niger                    | 32367 (26675-38995)    | 94529 (77961-113835)       | 192.1 | 372.7<br>(306.5-449.2) | 371.2<br>(305.3-447.4) | -0.4 | -0.02 (-0.03 to<br>-0.02) |
| Nigeria                  | 360020 (297636-430110) | 847527<br>(701421-1015824) | 135.4 | 379.5<br>(313.3-454.5) | 369.1<br>(304.5-441.9) | -2.7 | -0.1 (-0.13 to<br>-0.08)  |
| Sao Tome and<br>Principe | 485 (393-582)          | 805 (651-968)              | 66.2  | 372.4<br>(300.9-447.5) | 376.1<br>(304-452)     | 1.0  | 0.04 (0.03 to<br>0.05)    |
| Senegal                  | 30415 (24664-36640)    | 60185 (48847-72575)        | 97.9  | 371.6<br>(301.6-447.5) | 375.6<br>(304.9-452.4) | 1.1  | 0.04 (0.04 to<br>0.04)    |
| Sierra Leone             | 14324 (11715-17177)    | 32663 (26697-39178)        | 128.0 | 369.6<br>(302.1-444.6) | 372.4<br>(304.3-447.7) | 0.8  | 0.05 (0.04 to<br>0.06)    |
| Togo                     | 14682 (11941-17707)    | 31018 (25237-37444)        | 111.3 | 367.6                  | 368.3                  | 0.2  | 0 (0 to 0.01)             |



|                                   |                        |                              |       |                        |                        |      |                        |
|-----------------------------------|------------------------|------------------------------|-------|------------------------|------------------------|------|------------------------|
|                                   |                        |                              |       | (299.7-443.6)          | (300.3-444.6)          |      |                        |
| <b>Eastern sub-Saharan Africa</b> | 776444 (638587-926809) | 1667223<br>(1372086-1991501) | 114.7 | 378.2<br>(311.7-454.2) | 378.4<br>(311.7-454.4) | 0.1  | 0 (0 to 0)             |
| Burundi                           | 22445 (18456-27038)    | 48252 (39678-58109)          | 115.0 | 372<br>(305.8-448.1)   | 378.7<br>(311.7-456.5) | 1.8  | 0.08 (0.07 to 0.09)    |
| Comoros                           | 1889 (1551-2277)       | 2803 (2306-3380)             | 48.4  | 379.1<br>(311.5-457.5) | 381.4<br>(313.4-460.4) | 0.6  | 0 (0 to 0.01)          |
| Djibouti                          | 2065 (1694-2479)       | 4897 (4020-5877)             | 137.1 | 393.8<br>(324.1-473.3) | 393.1<br>(323.6-472.5) | -0.2 | 0 (0 to 0.01)          |
| Eritrea                           | 12296 (10052-14724)    | 27030 (22122-32421)          | 119.8 | 374.1<br>(305.9-449.6) | 376.8<br>(307.9-452.7) | 0.7  | 0.02 (0.02 to 0.03)    |
| Ethiopia                          | 211512 (173745-253595) | 439965 (361753-527851)       | 108.0 | 381.5<br>(314.2-457.9) | 383.2<br>(315.6-459.4) | 0.4  | 0.01 (0 to 0.02)       |
| Kenya                             | 95473 (78434-114447)   | 202203 (166312-242819)       | 111.8 | 380.7<br>(313.4-457.8) | 381.1<br>(313.8-457.9) | 0.1  | 0.01 (0 to 0.01)       |
| Madagascar                        | 48507 (39611-58300)    | 107351 (87574-128998)        | 121.3 | 378.6<br>(308.5-456.2) | 378.4<br>(308.4-455.9) | -0.1 | 0 (0 to 0)             |
| Malawi                            | 38569 (31362-46392)    | 73683 (59926-88672)          | 91.0  | 373.9<br>(305-449.8)   | 372.1<br>(303.6-447.9) | -0.5 | -0.03 (-0.03 to -0.02) |
| Mozambique                        | 51926 (42374-62763)    | 118485 (96737-143154)        | 128.2 | 369<br>(301-445.4)     | 369.6<br>(301.5-446.2) | 0.2  | 0 (0 to 0.01)          |
| Rwanda                            | 28972 (23900-34810)    | 50089 (41292-60336)          | 72.9  | 372.5<br>(306.7-448.3) | 372.4<br>(306.6-448.2) | 0.0  | 0 (-0.02 to 0.02)      |
| Somalia                           | 29671 (24188-35948)    | 84110 (68570-101928)         | 183.5 | 381.7<br>(311.3-462.6) | 379<br>(308.8-459.5)   | -0.7 | -0.02 (-0.03 to -0.02) |
| South Sudan                       | 24403 (19993-29165)    | 37683 (30864-44999)          | 54.4  | 391.1<br>(321.5-469.5) | 378.8<br>(311.3-454.6) | -3.1 | -0.11 (-0.12 to -0.09) |

|                                   |                        |                        |       |                        |                        |      |                        |
|-----------------------------------|------------------------|------------------------|-------|------------------------|------------------------|------|------------------------|
| United Republic of Tanzania       | 104284 (85332-125555)  | 226325 (185245-272497) | 117.0 | 373.2<br>(305.4-450.5) | 373.5<br>(305.5-450.8) | 0.1  | 0 (0 to 0)             |
| Uganda                            | 71661 (58509-86022)    | 169727 (138581-203749) | 136.8 | 381.3<br>(311.5-457.4) | 378.8<br>(309.3-454.5) | -0.7 | -0.02 (-0.02 to -0.01) |
| Zambia                            | 32202 (26483-38748)    | 73287 (60265-88257)    | 127.6 | 375.5<br>(308.2-452)   | 375.8<br>(308.5-452.4) | 0.1  | 0 (0 to 0)             |
| <b>Central sub-Saharan Africa</b> | 221912 (180990-266895) | 522574 (426207-628311) | 135.5 | 370.4<br>(303-446.3)   | 370.8<br>(303.3-446.9) | 0.1  | -0.01 (-0.01 to 0)     |
| Angola                            | 41586 (33794-50166)    | 119408 (96965-144153)  | 187.1 | 375.3<br>(305.9-452.8) | 366.7<br>(298.9-442.6) | -2.3 | -0.08 (-0.09 to -0.07) |
| Central African Republic          | 10875 (8886-13126)     | 20847 (17026-25167)    | 91.7  | 367.7<br>(299.2-443.9) | 367<br>(298.6-442.9)   | -0.2 | 0 (0 to 0)             |
| Congo                             | 9697 (7926-11664)      | 20503 (16770-24710)    | 111.4 | 368<br>(301.5-444.2)   | 371.9<br>(304.7-448.8) | 1.1  | 0.03 (0.02 to 0.03)    |
| Democratic Republic of the Congo  | 154139 (125512-185794) | 349249 (284437-420369) | 126.6 | 369.6<br>(301.1-446.4) | 372.2<br>(303.2-449.6) | 0.7  | 0.03 (0.02 to 0.03)    |
| Equatorial Guinea                 | 1699 (1403-2043)       | 5883 (4861-7067)       | 246.2 | 362.6<br>(299.2-437)   | 380.6<br>(314.7-458.7) | 5.0  | 0.19 (0.18 to 0.21)    |
| Gabon                             | 3917 (3183-4741)       | 6682 (5420-8098)       | 70.6  | 373.1<br>(303.3-451.9) | 369.1<br>(300.1-446.9) | -1.1 | -0.04 (-0.04 to -0.04) |

Note: ASD, autism spectrum disorders; ASPR, age-standardized prevalence rate; SDI, sociodemographic index.

**eTable 2. Number and age-standardized rates of incidence for ASD globally and by SDI group, GBD region and super-region, country, and territory in 1990 and 2019.**

|                                  | Incident cases<br>No. (95% UI) |                                 |           | ASIR/100,000<br>No. (95% UI) |                     |           |                        |
|----------------------------------|--------------------------------|---------------------------------|-----------|------------------------------|---------------------|-----------|------------------------|
|                                  | 1990                           | 2019                            | Change, % | 1990                         | 2019                | Change, % | EAPC<br>No. (95% CI)   |
| <b>Global</b>                    | 602887.2<br>(501382-718288.3)  | 603789.9<br>(501680.1-720096.5) | 0.1       | 9.2 (7.6-10.9)               | 9.3 (7.7-11.1)      | 1.1       | 0.06 (0.04 to 0.07)    |
| High SDI                         | 75696 (63921-89058)            | 72189 (60836-84979)             | -4.6      | 13.3<br>(11.3-15.7)          | 14.5<br>(12.3-17.1) | 9.0       | 0.36 (0.31 to 0.41)    |
| High-middle SDI                  | 100983 (83515-120117)          | 77479 (64215-                   | 1.7       | 10.2<br>(8.4-12.1)           | 10.3<br>(8.6-12.3)  | 1.0       | 0.03 (0 to 0.06)       |
| Middle SDI                       | 173883<br>(143431-208737)      | 92332)                          | 0.1       | 8.4 (6.9-10.1)               | 8.4 (6.9-10.1)      | 0.0       | -0.04 (-0.06 to -0.02) |
| Low-middle SDI                   | 148418<br>(122088-177306)      | 139286 (114750-167032)          | 1.1       | 8.2 (6.7-9.8)                | 8.4 (6.9-10)        | 2.4       | 0.07 (0.06 to 0.08)    |
| Low SDI                          | 103577 (85506-123644)          | 137109<br>(1126789-163455)      | 0.1       | 9.2 (7.6-10.9)               | 9.2 (7.6-11)        | 0.0       | 0.04 (0.03 to 0.04)    |
| <b>High-income North America</b> | 29857.6<br>(25080.8-35105.6)   | 33093.1<br>(27799.6-38830.2)    | 10.8      | 13.6<br>(11.4-16)            | 16.4<br>(13.8-19.3) | 20.6      | 0.8 (0.67 to 0.93)     |
| Canada                           | 2918.4 (2537.1-3357)           | 2745.4 (2368.6-3134)            | -5.9      | 15 (13-17.2)                 | 15.2<br>(13.1-17.3) | 1.3       | 0.02 (0.02 to 0.03)    |
| Greenland                        | 7.8 (6.4-9.3)                  | 4.9 (4-5.9)                     | -36.6     | 13.5 (11-16)                 | 12.8<br>(10.5-15.3) | -5.2      | -0.06 (-0.17 to 0.05)  |
| United States of America         | 26930.7<br>(22448.4-31826.5)   | 30342.3<br>(25390.9-35736.7)    | 12.7      | 13.4<br>(11.2-15.9)          | 16.5<br>(13.8-19.5) | 23.1      | 0.87 (0.74 to 1.01)    |
| <b>Australasia</b>               | 1669.3 (1396.2-1988)           | 1957 (1636-2333.3)              | 17.2      | 11 (9.2-13.1)                | 11.1                | 0.9       | 0.07 (0.05 to          |

|                                 |                              |                              |       |                     |                     |      |                        |
|---------------------------------|------------------------------|------------------------------|-------|---------------------|---------------------|------|------------------------|
|                                 |                              |                              |       |                     | (9.3-13.2)          |      | 0.08)                  |
| Australia                       | 1347.1 (1123.8-1608.7)       | 1637 (1365.7-1954.9)         | 21.5  | 10.9 (9.1-13)       | 11.1<br>(9.2-13.2)  | 1.8  | 0.08 (0.06 to 0.1)     |
| New Zealand                     | 322.2 (267.6-382.9)          | 320 (265.6-380.3)            | -0.7  | 11.2<br>(9.3-13.3)  | 11.2<br>(9.3-13.3)  | 0.0  | 0.02 (0 to 0.04)       |
| <b>High-income Asia Pacific</b> | 14603<br>(12197.8-17336.6)   | 10411.5 (8699.3-12344.7)     | -28.7 | 15.4<br>(12.9-18.3) | 15.7<br>(13.1-18.6) | 1.9  | 0.11 (0.09 to 0.14)    |
| Brunei Darussalam               | 48.2 (39.6-57.9)             | 45.4 (37.4-54.6)             | -5.7  | 14.3<br>(11.8-17.2) | 14.8<br>(12.2-17.8) | 3.5  | 0.16 (0.13 to 0.18)    |
| Japan                           | 9409.5 (7879.4-11144.3)      | 7234.4 (6059.8-8548.2)       | -23.1 | 15.9<br>(13.3-18.8) | 16.7<br>(13.9-19.7) | 5.0  | 0.18 (0.16 to 0.2)     |
| Singapore                       | 384.8 (318.1-460.7)          | 397.8 (328.9-476.3)          | 3.4   | 15.7<br>(13-18.8)   | 14.5<br>(12-17.3)   | -7.6 | -0.15 (-0.26 to -0.04) |
| Republic of Korea               | 4760.5 (3935.4-5664.2)       | 2733.9 (2260.3-3250.8)       | -42.6 | 14.7<br>(12.1-17.5) | 13.9<br>(11.5-16.5) | -5.4 | -0.11 (-0.19 to -0.04) |
| <b>Western Europe</b>           | 31690.9<br>(26878.7-37290.6) | 29330.7<br>(24870.9-34482.4) | -7.4  | 14.2<br>(12.1-16.7) | 14.2<br>(12-16.7)   | 0.0  | -0.02 (-0.03 to -0.01) |
| Andorra                         | 4.2 (3.4-5)                  | 4.2 (3.4-5)                  | 0.5   | 16.5<br>(13.6-19.8) | 18.6<br>(15.3-22.3) | 12.7 | 0.51 (0.36 to 0.67)    |
| Austria                         | 623.2 (513.1-738)            | 588.1 (484.1-696.5)          | -5.6  | 13.9<br>(11.5-16.5) | 13.8<br>(11.4-16.4) | -0.7 | -0.04 (-0.05 to -0.02) |
| Belgium                         | 839.3 (698-1003.7)           | 811.4 (674.7-970.3)          | -3.3  | 13.9<br>(11.6-16.7) | 13.7<br>(11.4-16.4) | -1.4 | -0.06 (-0.07 to -0.05) |
| Cyprus                          | 97.9 (81.3-116.4)            | 101.8 (84.5-121)             | 3.9   | 14.8<br>(12.3-17.6) | 13.9<br>(11.6-16.6) | -6.1 | -0.19 (-0.23 to -0.14) |
| Denmark                         | 319.4 (309.4-332.4)          | 313.5 (303.9-326)            | -1.8  | 10.4<br>(10.1-10.9) | 10.3<br>(10-10.7)   | -1.0 | -0.05 (-0.07 to -0.04) |

|             |                        |                        |       |                     |                     |      |                           |
|-------------|------------------------|------------------------|-------|---------------------|---------------------|------|---------------------------|
| Finland     | 432.3 (358.7-515.7)    | 327.3 (271.6-390.5)    | -24.3 | 13.6<br>(11.3-16.3) | 13.5<br>(11.2-16.2) | -0.7 | -0.03 (-0.04 to<br>-0.03) |
| France      | 4099.1 (3489.8-4924.6) | 3922.1 (3343.5-4569.8) | -4.3  | 11.1<br>(9.5-13.4)  | 11.4<br>(9.7-13.3)  | 2.7  | 0.1 (0.08 to<br>0.12)     |
| Germany     | 5905.7 (4883.6-7091.7) | 4945.7 (4089.9-5938.9) | -16.3 | 13.8<br>(11.4-16.5) | 13.4<br>(11.1-16.1) | -2.9 | -0.2 (-0.24 to<br>-0.15)  |
| Greece      | 682.4 (568.2-819.4)    | 574.8 (478.7-690.3)    | -15.8 | 13.6<br>(11.4-16.4) | 13.9<br>(11.6-16.7) | 2.2  | 0.12 (0.1 to<br>0.15)     |
| Iceland     | 30.6 (25.4-36.2)       | 28 (23.3-33.1)         | -8.4  | 13.7<br>(11.4-16.2) | 13.7<br>(11.3-16.1) | 0.0  | 0.04 (0.01 to<br>0.07)    |
| Ireland     | 376.4 (310.9-448.9)    | 437 (360.9-521.2)      | 16.1  | 14.6<br>(12-17.4)   | 15<br>(12.4-17.9)   | 2.7  | 0.09 (0.06 to<br>0.11)    |
| Israel      | 617.4 (515.7-739.6)    | 1160.9 (969.7-1390.8)  | 88.0  | 12.3<br>(10.3-14.8) | 12.4<br>(10.4-14.9) | 0.8  | 0.01 (0 to 0.02)          |
| Italy       | 3804.3 (3170.9-4507.2) | 2960.3 (2467.6-3520.9) | -22.2 | 14.2<br>(11.8-16.8) | 13.9<br>(11.5-16.5) | -2.1 | -0.11 (-0.13 to<br>-0.1)  |
| Luxembourg  | 32.6 (27-38.9)         | 43.2 (35.8-51.5)       | 32.5  | 13.6<br>(11.3-16.2) | 13.6<br>(11.3-16.2) | 0.0  | -0.06 (-0.08 to<br>-0.03) |
| Malta       | 37 (30.4-44)           | 28.6 (23.6-34.1)       | -22.5 | 13.7<br>(11.3-16.3) | 13.9<br>(11.4-16.5) | 1.5  | 0.04 (0.02 to<br>0.07)    |
| Netherlands | 1456.1 (1193-1748.1)   | 1304.6 (1068.9-1566)   | -10.4 | 15.3<br>(12.5-18.4) | 15.2<br>(12.4-18.2) | -0.7 | -0.02 (-0.03 to<br>-0.01) |
| Norway      | 345.7 (288.8-412.9)    | 326.7 (272.1-387.9)    | -5.5  | 11.9<br>(10-14.2)   | 11.8 (9.8-14)       | -0.8 | -0.06 (-0.08 to<br>-0.04) |
| Portugal    | 772.5 (636.5-918.3)    | 528.3 (435.2-628)      | -31.6 | 14<br>(11.5-16.6)   | 13.7<br>(11.3-16.3) | -2.1 | -0.08 (-0.09 to<br>-0.06) |
| Spain       | 2714.6 (2246.8-3238.6) | 2529.6 (2093.8-3017.9) | -6.8  | 14.2                | 14.3                | 0.7  | 0.05 (0.03 to             |

|                               |                              |                          |       |                     |                     |      |                           |
|-------------------------------|------------------------------|--------------------------|-------|---------------------|---------------------|------|---------------------------|
|                               |                              |                          |       | (11.8-17)           | (11.9-17.1)         |      | 0.06)                     |
| Sweden                        | 1020.2 (850.5-1203.9)        | 977.5 (820.4-1154.8)     | -4.2  | 17<br>(14.2-20.1)   | 17.1<br>(14.4-20.2) | 0.6  | 0.02 (-0.01 to<br>0.05)   |
| Switzerland                   | 571.6 (473.4-684.2)          | 592.6 (490.8-709.4)      | 3.7   | 14.3<br>(11.8-17.1) | 13.9<br>(11.5-16.6) | -2.8 | -0.14 (-0.16 to<br>-0.12) |
| United Kingdom                | 6878.2 (5745.7-8114.6)       | 6794.9 (5675.9-8023.7)   | -1.2  | 17.9<br>(15-21.2)   | 18 (15-21.2)        | 0.6  | 0.01 (0 to 0.02)          |
| <b>Southern Latin America</b> | 6093.9 (5094.4-7271)         | 5784.1 (4838.4-6900.2)   | -5.1  | 12.1<br>(10.2-14.5) | 12.5<br>(10.4-14.9) | 3.3  | 0.1 (0.08 to<br>0.13)     |
| Argentina                     | 4045.9 (3359.4-4824.8)       | 4156.2 (3451.1-4956.3)   | 2.7   | 12.2<br>(10.1-14.5) | 12.5<br>(10.4-14.9) | 2.5  | 0.12 (0.1 to<br>0.15)     |
| Chile                         | 1719.7 (1436.6-2047.6)       | 1351 (1128.6-1608.6)     | -21.4 | 12<br>(10.1-14.3)   | 12.4<br>(10.4-14.8) | 3.3  | -0.04 (-0.05 to<br>-0.03) |
| Uruguay                       | 328.1 (270.7-390.7)          | 276.6 (228.3-329.4)      | -15.7 | 12.4<br>(10.2-14.8) | 12.6<br>(10.4-15)   | 1.6  | 0.09 (0.07 to<br>0.11)    |
| <b>Eastern Europe</b>         | 14258.9<br>(11833.5-17032.7) | 11166.3 (9243.9-13324.2) | -21.7 | 10.2<br>(8.4-12.1)  | 10.3<br>(8.5-12.3)  | 1.0  | 0.05 (0.03 to<br>0.06)    |
| Belarus                       | 684.5 (565.2-823.9)          | 506.8 (418.5-610)        | -26.0 | 10.1<br>(8.4-12.2)  | 10.2<br>(8.5-12.3)  | 1.0  | 0.05 (0.04 to<br>0.06)    |
| Estonia                       | 103.7 (85.1-123.8)           | 65.5 (53.7-78.2)         | -36.8 | 10 (8.2-12)         | 10.2<br>(8.4-12.2)  | 2.0  | 0.03 (-0.03 to<br>0.09)   |
| Latvia                        | 179.5 (147.4-213.9)          | 95.1 (78.1-113.4)        | -47.0 | 10.2<br>(8.4-12.2)  | 10.3<br>(8.5-12.3)  | 1.0  | 0.04 (-0.02 to<br>0.09)   |
| Lithuania                     | 278.9 (230.8-335.1)          | 135.6 (112.2-162.9)      | -51.4 | 10.3<br>(8.6-12.4)  | 10.4<br>(8.6-12.5)  | 1.0  | 0.07 (0.03 to<br>0.11)    |
| Republic of Moldova           | 379.9 (311.1-457.2)          | 158.9 (130.1-191.2)      | -58.2 | 10.3<br>(8.4-12.3)  | 10.3<br>(8.4-12.4)  | 0.0  | -0.01 (-0.02 to<br>0)     |

|                        |                         |                        |       |                    |                    |      |                        |
|------------------------|-------------------------|------------------------|-------|--------------------|--------------------|------|------------------------|
| Russian Federation     | 9439.6 (7796.3-11235.6) | 8269.3 (6817.2-9836.4) | -12.4 | 10.2<br>(8.4-12.1) | 10.3<br>(8.5-12.3) | 1.0  | 0.05 (0.04 to 0.06)    |
| Ukraine                | 3192.9 (2621.6-3845.1)  | 1935.2 (1588.8-2329.8) | -39.4 | 10.1<br>(8.3-12.1) | 10.3<br>(8.5-12.5) | 2.0  | 0.05 (0.01 to 0.08)    |
| <b>Central Europe</b>  | 7549.8 (6233.9-8947.8)  | 4859.6 (4014.1-5763.8) | -35.6 | 9.4 (7.8-11.1)     | 9.4 (7.8-11.2)     | 0.0  | 0 (-0.02 to 0.01)      |
| Albania                | 404.3 (329.6-486.1)     | 171 (139.4-205.6)      | -57.7 | 9.8 (8-11.8)       | 10.2<br>(8.3-12.2) | 4.1  | 0.18 (0.08 to 0.28)    |
| Bosnia and Herzegovina | 297.9 (242.7-355.4)     | 118.7 (96.7-141.6)     | -60.1 | 9.1 (7.4-10.9)     | 9.2 (7.5-11)       | 1.1  | -0.07 (-0.17 to 0.02)  |
| Bulgaria               | 448.9 (368.5-536)       | 271.6 (223-324.3)      | -39.5 | 9.5 (7.8-11.3)     | 9.4 (7.7-11.2)     | -1.1 | -0.02 (-0.06 to 0.02)  |
| Croatia                | 244.6 (199.5-293)       | 160 (130.5-191.7)      | -34.6 | 9.1 (7.4-10.9)     | 9.3 (7.6-11.2)     | 2.2  | 0.12 (0.09 to 0.15)    |
| Czechia                | 582.1 (472.2-704.8)     | 493.9 (400.7-598.1)    | -15.1 | 9.5 (7.7-11.5)     | 9.4 (7.6-11.4)     | -1.1 | -0.02 (-0.03 to 0)     |
| Hungary                | 560.1 (459.1-673.1)     | 373.1 (305.8-448.3)    | -33.4 | 9.4 (7.7-11.3)     | 9.4 (7.7-11.3)     | 0.0  | 0.01 (0 to 0.03)       |
| North Macedonia        | 161 (131.5-193.4)       | 101.3 (82.7-121.6)     | -37.1 | 9.6 (7.8-11.5)     | 9.5 (7.7-11.4)     | -1.0 | -0.02 (-0.11 to 0.07)  |
| Montenegro             | 43.9 (35.9-53.1)        | 30.2 (24.7-36.5)       | -31.3 | 9.1 (7.5-11)       | 9.4 (7.7-11.3)     | 3.3  | 0.08 (0.06 to 0.1)     |
| Poland                 | 2426.4 (1997-2878.3)    | 1659 (1365.5-1970.4)   | -31.6 | 9.4 (7.7-11.2)     | 9.5 (7.8-11.3)     | 1.1  | -0.01 (-0.04 to 0.02)  |
| Romania                | 1302 (1069.6-1555.7)    | 781.9 (642.2-934.3)    | -39.9 | 9.1 (7.5-10.9)     | 9.4 (7.7-11.2)     | 3.3  | 0.04 (0.01 to 0.06)    |
| Serbia                 | 623.1 (509.5-747.8)     | 362.3 (296.3-434.9)    | -41.8 | 9.7 (8-11.7)       | 9.1 (7.5-11)       | -6.2 | -0.26 (-0.34 to -0.18) |

|                              |                              |                              |       |                    |                    |      |                        |
|------------------------------|------------------------------|------------------------------|-------|--------------------|--------------------|------|------------------------|
| Slovakia                     | 355.6 (291.7-427.3)          | 251.2 (206.1-301.9)          | -29.4 | 9.4 (7.7-11.3)     | 9.4 (7.7-11.3)     | 0.0  | 0.01 (-0.01 to 0.03)   |
| Slovenia                     | 99.8 (80.9-119.9)            | 85.5 (69.2-102.6)            | -14.4 | 9.4 (7.6-11.2)     | 9.4 (7.6-11.3)     | 0.0  | 0.02 (0 to 0.03)       |
| <b>Central Asia</b>          | 9227 (7599.3-11021)          | 8923.4 (7349.2-10654.3)      | -3.3  | 9.9 (8.1-11.8)     | 9.9 (8.1-11.8)     | 0.0  | 0.03 (0 to 0.06)       |
| Armenia                      | 374.9 (304.6-453.9)          | 182.7 (148.5-221.2)          | -51.3 | 10.3<br>(8.4-12.5) | 10.1<br>(8.2-12.3) | -1.9 | -0.09 (-0.14 to -0.04) |
| Azerbaijan                   | 960 (788.5-1149.2)           | 734.6 (604-878.9)            | -23.5 | 10.5<br>(8.7-12.6) | 10.7<br>(8.8-12.8) | 1.9  | 0.13 (0.04 to 0.21)    |
| Georgia                      | 382.5 (314.8-4566.1)         | 215.8 (177.6-257.4)          | -43.6 | 9.5 (7.9-11.4)     | 9.8 (8.1-11.8)     | 3.2  | 0.3 (-0.53 to 1.13)    |
| Kazakhstan                   | 1658.9 (1356.8-1987.5)       | 1645.4 (1345.8-1971.2)       | -0.8  | 9.7 (8-11.7)       | 9.7 (7.9-11.6)     | 0.0  | -0.04 (-0.06 to -0.03) |
| Kyrgyzstan                   | 577.8 (475.7-689.6)          | 675.3 (555.9-805.7)          | 16.9  | 9.6 (7.9-11.4)     | 9.7 (8-11.5)       | 1.0  | 0.08 (0.06 to 0.11)    |
| Mongolia                     | 348.7 (282.8-417.9)          | 388.8 (315.3-466)            | 11.5  | 10 (8.1-11.9)      | 10.1<br>(8.2-12.1) | 1.0  | 0.02 (-0.04 to 0.08)   |
| Tajikistan                   | 973.8 (798.7-1166.5)         | 1189.4 (975.6-1424.8)        | 22.1  | 9.9 (8.1-11.9)     | 9.8 (8-11.7)       | -1.0 | -0.06 (-0.08 to -0.05) |
| Turkmenistan                 | 628.2 (512.9-753.8)          | 531.3 (433.8-637.5)          | -15.4 | 10 (8.2-12)        | 9.9 (8.1-11.9)     | -1.0 | -0.06 (-0.08 to -0.04) |
| Uzbekistan                   | 3322.2 (2715.5-4009)         | 3360 (2746.7-4056)           | 1.1   | 9.7 (7.9-11.7)     | 9.8 (8-11.8)       | 1.0  | 0.01 (0.01 to 0.02)    |
| <b>Central Latin America</b> | 21860.2<br>(18042.8-26050.3) | 19339.8<br>(15980.3-23070.3) | -11.5 | 9.2 (7.6-11)       | 9.2 (7.6-10.9)     | 0.0  | -0.01 (-0.02 to 0)     |
| Colombia                     | 3961.5 (3226.1-4765.8)       | 3391.7 (2762.2-4080.2)       | -14.4 | 8.9 (7.2-10.7)     | 8.9 (7.3-10.7)     | 0.0  | 0.02 (-0.05 to 0.08)   |
| Costa Rica                   | 338.4 (275.5-407.8)          | 278 (226.3-335.1)            | -17.8 | 8.7 (7.1-10.5)     | 8.7 (7.1-10.5)     | 0.0  | -0.04 (-0.05 to        |



|                                    |                             |                        |       |                |                |      |                        |
|------------------------------------|-----------------------------|------------------------|-------|----------------|----------------|------|------------------------|
|                                    |                             |                        |       |                |                |      | -0.04)                 |
| El Salvador                        | 697.7 (566.4-837)           | 473.9 (384.7-568.6)    | -32.1 | 8.9 (7.2-10.7) | 8.8 (7.1-10.5) | -1.1 | -0.03 (-0.04 to -0.03) |
| Guatemala                          | 1438.2 (1182.3-1719.1)      | 1721.7 (1415.3-2057.9) | 19.7  | 8.9 (7.3-10.6) | 8.7 (7.2-10.4) | -2.2 | -0.06 (-0.09 to -0.03) |
| Honduras                           | 762.7 (616.2-916)           | 984.5 (795.4-1182.3)   | 29.1  | 8.9 (7.2-10.6) | 8.7 (7.1-10.5) | -2.2 | -0.06 (-0.07 to -0.05) |
| Mexico                             | 11606.5<br>(9552.8-13773.6) | 9738 (8036.1-11527.5)  | -16.1 | 9.7 (8-11.6)   | 9.7 (8-11.5)   | 0.0  | -0.03 (-0.03 to -0.02) |
| Nicaragua                          | 605.2 (495.2-724)           | 548.8 (449-656.5)      | -9.3  | 8.8 (7.2-10.5) | 8.7 (7.1-10.4) | -1.1 | -0.02 (-0.03 to -0.01) |
| Panama                             | 247.5 (200.7-296.8)         | 319.5 (259.1-383.1)    | 29.1  | 8.7 (7.1-10.5) | 8.7 (7-10.4)   | 0.0  | -0.03 (-0.04 to -0.01) |
| Venezuela (Bolivarian Republic of) | 2202.3 (1802-2661.6)        | 1883.6 (1541.2-2276.4) | -14.5 | 8 (6.6-9.7)    | 8.3 (6.8-10)   | 3.8  | 0.14 (0.06 to 0.23)    |
| <b>Andean Latin America</b>        | 5235.2 (4322-6298.6)        | 5658.7 (4672-6810.1)   | 8.1   | 9.1 (7.5-10.9) | 9 (7.4-10.8)   | -1.1 | -0.05 (-0.08 to -0.02) |
| Bolivia (Plurinational State of)   | 1046.8 (857.1-1266.9)       | 1393.8 (1141.2-1686.9) | 33.2  | 9 (7.4-10.9)   | 9 (7.4-10.9)   | 0.0  | 0.03 (0.01 to 0.06)    |
| Ecuador                            | 1289.2 (1051.7-1553.3)      | 1486.2 (1212.4-1790.7) | 15.3  | 9 (7.3-10.8)   | 8.9 (7.2-10.7) | -1.1 | -0.07 (-0.08 to -0.06) |
| Peru                               | 2899.2 (2374-3496.1)        | 2778.7 (2275.4-3350.6) | -4.2  | 9.1 (7.5-11)   | 9.1 (7.4-10.9) | 0.0  | -0.07 (-0.12 to -0.02) |
| <b>Caribbean</b>                   | 3895.6 (3214.8-4673.5)      | 3499.1 (2882.4-4185.3) | -10.2 | 9 (7.4-10.8)   | 9 (7.4-10.7)   | 0.0  | 0.05 (0.03 to 0.07)    |
| Antigua and Barbuda                | 5.7 (4.7-6.9)               | 4.2 (3.4-5.1)          | -26.4 | 8.8 (7.1-10.5) | 8.8 (7.2-10.6) | 0.0  | 0.04 (0.03 to 0.05)    |

|                       |                       |                        |       |                |                |      |                        |
|-----------------------|-----------------------|------------------------|-------|----------------|----------------|------|------------------------|
| Bahamas               | 22.4 (18.3-27.1)      | 17.3 (14.1-20.9)       | -22.8 | 8.6 (7.1-10.5) | 8.7 (7.1-10.5) | 1.2  | -0.04 (-0.08 to 0.01)  |
| Barbados              | 17.8 (14.7-21.4)      | 12.1 (10-14.5)         | -32.1 | 8.9 (7.3-10.6) | 8.8 (7.2-10.6) | -1.1 | -0.03 (-0.04 to -0.01) |
| Belize                | 25 (20.4-29.9)        | 32.2 (26.2-38.6)       | 28.9  | 8.8 (7.2-10.6) | 8.8 (7.1-10.5) | 0.0  | -0.04 (-0.06 to -0.02) |
| Bermuda               | 3.8 (3.1-4.6)         | 2.2 (1.8-2.6)          | -42.8 | 8.9 (7.3-10.7) | 8.9 (7.2-10.7) | 0.0  | 0.02 (0.01 to 0.03)    |
| Cuba                  | 773.9 (627.9-932.7)   | 447.3 (362.9-539.1)    | -42.2 | 8.9 (7.2-10.7) | 8.9 (7.2-10.7) | 0.0  | -0.01 (-0.04 to 0.01)  |
| Dominica              | 7.3 (6-8.8)           | 3.5 (2.9-4.2)          | -52.0 | 8.9 (7.3-10.8) | 8.8 (7.2-10.6) | -1.1 | -0.08 (-0.11 to -0.05) |
| Dominican Republic    | 1047.4 (849.8-1253.3) | 980.8 (795.8-1173.6)   | -6.4  | 9.1 (7.4-10.9) | 9 (7.3-10.7)   | -1.1 | -0.08 (-0.08 to -0.07) |
| Grenada               | 8.3 (6.8-10)          | 6 (4.8-7.2)            | -28.4 | 8.7 (7.1-10.5) | 8.9 (7.3-10.7) | 2.3  | 0.07 (0.06 to 0.09)    |
| Guyana                | 97.2 (79.1-116.6)     | 61.2 (49.8-73.5)       | -37.0 | 9.1 (7.4-11)   | 8.9 (7.3-10.7) | -2.2 | -0.05 (-0.09 to -0.01) |
| Haiti                 | 1061.8 (868.2-1277.4) | 1426.7 (1166.6-1716.4) | 34.4  | 9 (7.3-10.8)   | 9 (7.4-10.8)   | 0.0  | 0 (-0.02 to 0.02)      |
| Jamaica               | 235.8 (193.4-283.1)   | 152.5 (125.1-183.1)    | -35.3 | 8.8 (7.2-10.5) | 8.8 (7.2-10.6) | 0.0  | 0.05 (0.04 to 0.06)    |
| Puerto Rico           | 278.4 (227.4-335.1)   | 108.1 (88.3-130.1)     | -61.2 | 8.8 (7.2-10.6) | 8.9 (7.3-10.7) | 1.1  | 0.04 (0.01 to 0.07)    |
| Saint Lucia           | 16.2 (13.2-19.4)      | 7.5 (6.2-9)            | -53.4 | 8.9 (7.3-10.7) | 8.8 (7.2-10.6) | -1.1 | -0.03 (-0.04 to -0.02) |
| Saint Vincent and the | 11.3 (9.2-13.7)       | 6.4 (5.2-7.8)          | -43.1 | 8.9 (7.2-10.7) | 8.9 (7.2-10.7) | 0.0  | -0.02 (-0.03 to        |

|                                       |                                |                              |       |                |                |      |                        |
|---------------------------------------|--------------------------------|------------------------------|-------|----------------|----------------|------|------------------------|
| Grenadines                            |                                |                              |       |                |                |      | -0.01)                 |
| Suriname                              | 40.9 (33.9-49.3)               | 38.9 (32.2-46.9)             | -4.9  | 9.4 (7.8-11.3) | 9 (7.5-10.9)   | -4.3 | -0.15 (-0.17 to -0.13) |
| Trinidad and Tobago                   | 99.1 (80.7-119.9)              | 65.4 (53.2-79.1)             | -34.0 | 8.8 (7.2-10.7) | 8.8 (7.2-10.7) | 0.0  | 0.01 (0 to 0.01)       |
| United States Virgin Islands          | 9.7 (7.9-11.6)                 | 5.4 (4.4-6.5)                | -44.1 | 8.9 (7.3-10.8) | 8.9 (7.3-10.8) | 0.0  | 0 (-0.03 to 0.02)      |
| <b>Tropical Latin America</b>         | 15756.3<br>(13009.1-18759.5)   | 14381.9<br>(11893.9-17113.6) | -8.7  | 9.2 (7.6-11)   | 9.3 (7.7-11.1) | 1.1  | 0.06 (0.03 to 0.08)    |
| Brazil                                | 15199.2<br>(12525-18107.9)     | 13830.8 (11415-16469.2)      | -9.0  | 9.2 (7.6-11)   | 9.3 (7.7-11.1) | 1.1  | 0.06 (0.03 to 0.08)    |
| Paraguay                              | 557.1 (456.4-673.8)            | 551 (451.4-666.4)            | -1.1  | 9.1 (7.4-11)   | 9.1 (7.5-11)   | 0.0  | 0.01 (0.01 to 0.02)    |
| <b>East Asia</b>                      | 111604.1<br>(91661.2-133842.6) | 71074.2<br>(58298.2-84933.9) | -36.3 | 9.3 (7.6-11.1) | 9.6 (7.9-11.5) | 3.2  | 0.03 (-0.04 to 0.09)   |
| China                                 | 108205.9<br>(88914.7-129774.2) | 69469 (56972.9-83020.4)      | -35.8 | 9.4 (7.7-11.3) | 9.7 (8-11.6)   | 3.2  | 0.05 (0 to 0.11)       |
| Democratic People's Republic of Korea | 2522.8 (2042.5-3048.4)         | 1142.9 (925.3-1381)          | -54.7 | 7.3 (5.9-8.8)  | 6.9 (5.6-8.4)  | -5.5 | -0.25 (-0.3 to -0.2)   |
| Taiwan (province of China)            | 875.3 (741-1031.4)             | 462.2 (391.2-544.6)          | -47.2 | 5.5 (4.7-6.5)  | 5.4 (4.6-6.4)  | -1.8 | -0.03 (-0.08 to 0.02)  |
| <b>Southeast Asia</b>                 | 49221<br>(40292.4-58766.9)     | 42760.9 (34987-51275.6)      | -13.1 | 8.2 (6.7-9.7)  | 8.2 (6.7-9.8)  | 0.0  | 0.02 (0.01 to 0.02)    |
| Cambodia                              | 1735.1 (1403.5-2100.6)         | 1444.4 (1168.4-1748.7)       | -16.8 | 8.3 (6.7-10)   | 8.2 (6.7-10)   | -1.2 | 0.08 (0.04 to 0.12)    |
| Indonesia                             | 18431.1<br>(15038.7-21962.1)   | 14827.7 (12099.1-17703)      | -19.6 | 8.1 (6.6-9.6)  | 8 (6.6-9.6)    | -1.2 | 0 (-0.01 to 0)         |
| Lao People's Democratic               | 648.6 (531.6-783)              | 680.5 (557.8-821.5)          | 4.9   | 8.1 (6.7-9.8)  | 8.3 (6.8-10)   | 2.5  | 0.09 (0.06 to          |

|                                  |                        |                          |       |                |               |      |                        |
|----------------------------------|------------------------|--------------------------|-------|----------------|---------------|------|------------------------|
| Republic                         |                        |                          |       |                |               |      | 0.12)                  |
| Malaysia                         | 1927.3 (1555.9-2314.2) | 2106 (1700.3-2528.9)     | 9.3   | 8.1 (6.5-9.7)  | 8.1 (6.5-9.7) | 0.0  | 0.02 (0 to 0.03)       |
| Maldives                         | 34.4 (28-41.5)         | 33.2 (27-40.1)           | -3.4  | 8.2 (6.6-9.9)  | 8.2 (6.7-9.9) | 0.0  | 0.05 (0.02 to 0.07)    |
| Mauritius                        | 85.9 (70.5-102.8)      | 49.6 (40.7-59.3)         | -42.3 | 8 (6.5-9.5)    | 8 (6.6-9.6)   | 0.0  | 0.03 (0.01 to 0.05)    |
| Myanmar                          | 5274.3 (4260.1-6344.3) | 4140.8 (3344.6-4981.2)   | -21.5 | 8.3 (6.7-10)   | 8.3 (6.7-10)  | 0.0  | 0 (-0.01 to 0.01)      |
| Philippines                      | 8258.4 (6756.5-9849.7) | 10544.3 (8629.8-12593.7) | 27.7  | 8.3 (6.8-9.9)  | 8.3 (6.8-9.9) | 0.0  | 0 (-0.01 to 0.02)      |
| Sri Lanka                        | 1427.4 (1164.3-1717.7) | 1179.3 (962-1419.3)      | -17.4 | 8.3 (6.8-10)   | 8.3 (6.7-10)  | 0.0  | 0 (-0.01 to 0.01)      |
| Seychelles                       | 6.6 (5.4-7.9)          | 5.8 (4.7-6.9)            | -12.7 | 8.2 (6.7-9.8)  | 8.1 (6.7-9.7) | -1.2 | -0.04 (-0.04 to -0.04) |
| Thailand                         | 4163.5 (3426.7-4987.8) | 2289.6 (1884.4-2742.9)   | -45.0 | 8.2 (6.7-9.8)  | 8.2 (6.7-9.8) | 0.0  | 0.02 (-0.03 to 0.06)   |
| Timor-Leste                      | 149.3 (121.9-179.2)    | 152 (124.1-182.5)        | 1.8   | 8.7 (7.1-10.5) | 8.3 (6.7-9.9) | -4.6 | -0.23 (-0.25 to -0.21) |
| Viet Nam                         | 7013.7 (5706.1-8442.3) | 5251.6 (4274.4-6321.5)   | -25.1 | 8 (6.5-9.6)    | 8.2 (6.7-9.9) | 2.5  | 0.09 (0.06 to 0.12)    |
| <b>Oceania</b>                   | 807.9 (660.9-977.1)    | 1505.5 (1228.3-1822.1)   | 86.3  | 7.6 (6.2-9.2)  | 7.6 (6.2-9.3) | 0.0  | 0.03 (0.01 to 0.04)    |
| American Samoa                   | 6.2 (5.1-7.6)          | 3.8 (3.1-4.6)            | -39.2 | 7.6 (6.2-9.3)  | 7.5 (6.1-9.2) | -1.3 | -0.06 (-0.06 to -0.06) |
| Micronesia (Federated States of) | 12.7 (10.3-15.3)       | 7 (5.7-8.5)              | -44.7 | 7.6 (6.2-9.2)  | 7.5 (6.1-9.1) | -1.3 | -0.05 (-0.05 to -0.05) |
| Fiji                             | 68 (55.7-81.9)         | 63 (51.6-75.9)           | -7.3  | 7.5 (6.1-9)    | 7.5 (6.1-9)   | 0.0  | 0 (-0.02 to            |

|                                     |                              |                              |       |               |               |      |                        |
|-------------------------------------|------------------------------|------------------------------|-------|---------------|---------------|------|------------------------|
|                                     |                              |                              |       |               |               |      | 0.02)                  |
| Guam                                | 13.8 (11.2-16.7)             | 11.8 (9.5-14.2)              | -14.9 | 7.7 (6.2-9.2) | 7.5 (6.1-9.1) | -2.6 | -0.08 (-0.1 to -0.07)  |
| Kiribati                            | 9.4 (7.7-11.3)               | 11 (9-13.2)                  | 17.0  | 7.6 (6.2-9.1) | 7.6 (6.2-9.1) | 0.0  | 0 (-0.01 to 0.01)      |
| Marshall Islands                    | 5.5 (4.5-6.6)                | 4.5 (3.7-5.4)                | -17.7 | 7.5 (6.1-9.1) | 7.6 (6.2-9.2) | 1.3  | 0.05 (0.02 to 0.07)    |
| Northern Mariana Islands            | 4.6 (3.7-5.6)                | 1.8 (1.5-2.2)                | -60.6 | 7.6 (6.1-9.1) | 7.8 (6.3-9.4) | 2.6  | 0.1 (0.01 to 0.18)     |
| Papua New Guinea                    | 542.4 (441.8-656.5)          | 1202.4 (979.5-1455.4)        | 121.7 | 7.6 (6.2-9.2) | 7.7 (6.2-9.3) | 1.3  | 0.04 (0.02 to 0.06)    |
| Samoa                               | 11.3 (9.2-13.6)              | 12.8 (10.4-15.4)             | 13.1  | 6.9 (5.6-8.3) | 6.9 (5.6-8.4) | 0.0  | 0.07 (0.05 to 0.08)    |
| Solomon Islands                     | 53.2 (43.3-64.5)             | 76.8 (62.6-93.2)             | 44.4  | 7.8 (6.3-9.4) | 7.7 (6.3-9.3) | -1.3 | -0.06 (-0.08 to -0.04) |
| Tonga                               | 9.1 (7.4-11)                 | 8.2 (6.7-9.9)                | -10.1 | 7.3 (5.9-8.8) | 7.3 (5.9-8.8) | 0.0  | 0 (-0.01 to 0.02)      |
| Vanuatu                             | 20.8 (16.8-25.3)             | 27.5 (22.2-33.4)             | 32.2  | 7.6 (6.2-9.2) | 7.5 (6-9)     | -1.3 | -0.1 (-0.12 to -0.09)  |
| <b>North Africa and Middle East</b> | 44220.8<br>(36224.9-53111.2) | 45002.1<br>(36856.6-53911.9) | 1.8   | 7.9 (6.5-9.5) | 7.7 (6.3-9.3) | -2.5 | -0.06 (-0.07 to -0.05) |
| Afghanistan                         | 1914.7 (1545.2-2312)         | 5431.2 (4383.1-6558.7)       | 183.7 | 7.7 (6.2-9.3) | 7.6 (6.2-9.2) | -1.3 | 0.17 (0.04 to 0.3)     |
| Algeria                             | 2758.3 (2242.5-3313.8)       | 3175.9 (2582-3815.7)         | 15.1  | 7.5 (6.1-9)   | 7.6 (6.2-9.1) | 1.3  | -0.04 (-0.09 to 0.01)  |
| Bahrain                             | 49.1 (39.8-59.3)             | 46.2 (37.5-55.8)             | -5.8  | 7.5 (6.1-9)   | 7.4 (6-9)     | -1.3 | -0.03 (-0.1 to 0.03)   |

|                            |                        |                        |       |                |                |      |                        |
|----------------------------|------------------------|------------------------|-------|----------------|----------------|------|------------------------|
| Egypt                      | 7028.3 (5671.1-8533.9) | 7579.9 (6116.1-9203.7) | 7.8   | 7.8 (6.3-9.4)  | 7.5 (6-9.1)    | -3.8 | -0.15 (-0.17 to -0.14) |
| Iran (Islamic Republic of) | 7625.9 (6312.5-9118.7) | 6041.2 (4992.1-7192.6) | -20.8 | 8.9 (7.4-10.7) | 9.3 (7.7-11.1) | 4.5  | 0.04 (-0.01 to 0.08)   |
| Iraq                       | 2615.1 (2122.1-3150.5) | 3409.9 (2767-4108.2)   | 30.4  | 7.8 (6.3-9.4)  | 7.4 (6-8.9)    | -5.1 | -0.01 (-0.08 to 0.05)  |
| Jordan                     | 493.5 (401.7-595.4)    | 860.1 (700.1-1037.7)   | 74.3  | 7.5 (6.1-9.1)  | 7.3 (5.9-8.8)  | -2.7 | -0.21 (-0.29 to -0.14) |
| Kuwait                     | 141.6 (115.5-171.3)    | 217.1 (177.1-262.6)    | 53.3  | 7.7 (6.3-9.4)  | 7.4 (6-8.9)    | -3.9 | 0 (-0.07 to 0.07)      |
| Lebanon                    | 421.3 (342.9-510.5)    | 397.4 (323.5-481.6)    | -5.7  | 8 (6.5-9.7)    | 7.9 (6.4-9.5)  | -1.3 | -0.12 (-0.22 to -0.03) |
| Libya                      | 546.9 (452.7-661.4)    | 285.7 (236.5-345.5)    | -47.8 | 7.6 (6.3-9.2)  | 7.3 (6-8.8)    | -3.9 | -0.15 (-0.21 to -0.09) |
| Morocco                    | 2890.8 (2352.7-3471.8) | 2180.9 (1774.9-2619.1) | -24.6 | 7.6 (6.2-9.2)  | 7.6 (6.2-9.1)  | 0.0  | -0.05 (-0.07 to -0.03) |
| Oman                       | 226.8 (184.9-272.4)    | 265.8 (216.7-319.1)    | 17.2  | 7.1 (5.8-8.6)  | 7.1 (5.8-8.5)  | 0.0  | -0.07 (-0.13 to -0.01) |
| Palestine                  | 343.4 (277.9-413.9)    | 448.1 (362.7-540.2)    | 30.5  | 7.5 (6.1-9.1)  | 7.5 (6.1-9)    | 0.0  | -0.03 (-0.04 to -0.01) |
| Qatar                      | 37.7 (30.6-45.4)       | 95.2 (77.4-114.6)      | 152.5 | 7.5 (6.1-9)    | 7.3 (5.9-8.7)  | -2.7 | -0.12 (-0.15 to -0.09) |
| Saudi Arabia               | 1927.6 (1563.4-2326.5) | 1629.5 (1321.7-1966.8) | -15.5 | 7.5 (6.1-9.1)  | 7.4 (6-9)      | -1.3 | -0.04 (-0.05 to -0.03) |
| Sudan                      | 3797.8 (3088.8-4590.8) | 4330.6 (3522.1-5234.8) | 14.0  | 8.1 (6.6-9.8)  | 7.7 (6.3-9.3)  | -4.9 | -0.22 (-0.24 to -0.21) |
| Syrian Arab Republic       | 1852.4 (1514.1-2227.5) | 831.3 (679.5-999.6)    | -55.1 | 7.7 (6.3-9.2)  | 7.4 (6.1-8.9)  | -3.9 | 0.2 (0 to 0.39)        |

|                                    |                               |                                 |       |                    |                |      |                        |
|------------------------------------|-------------------------------|---------------------------------|-------|--------------------|----------------|------|------------------------|
| Tunisia                            | 865.3 (703.2-1043.7)          | 601.2 (488.6-725.2)             | -30.5 | 7.6 (6.2-9.2)      | 7.5 (6.1-9)    | -1.3 | -0.09 (-0.11 to -0.07) |
| Turkey                             | 6033.9 (4930.1-7317)          | 3514.1 (2871.2-4261.3)          | -41.8 | 7.6 (6.2-9.3)      | 7.5 (6.1-9.1)  | -1.3 | -0.11 (-0.15 to -0.07) |
| United Arab Emirates               | 166.6 (134.8-201.3)           | 201.3 (162.9-243.4)             | 20.9  | 7.5 (6.1-9.1)      | 7.5 (6-9)      | 0.0  | 0.03 (-0.04 to 0.11)   |
| Yemen                              | 2454.2 (2015.6-2956.2)        | 3413.5 (2803.5-4111.6)          | 39.1  | 7.6 (6.2-9.1)      | 7.6 (6.3-9.2)  | 0.0  | -0.03 (-0.05 to 0)     |
| <b>South Asia</b>                  | 129805.7<br>(106720-155432)   | 121885.7<br>(100112.7-145614.1) | -6.1  | 7.6 (6.2-9)        | 7.6 (6.2-9.1)  | 0.0  | 0.01 (0 to 0.01)       |
| Bangladesh                         | 13928.2<br>(11349.8-16705.3)  | 9788.3 (7976.7-11740.1)         | -29.7 | 7.4 (6-8.9)        | 7.6 (6.2-9.1)  | 2.7  | 0.08 (0.07 to 0.09)    |
| Bhutan                             | 84.6 (68.9-102.6)             | 50.9 (41.5-61.7)                | -39.8 | 8 (6.5-9.7)        | 7.9 (6.5-9.6)  | -1.3 | -0.07 (-0.13 to -0.02) |
| India                              | 94539.1<br>(77557.5-113868.7) | 84788.7<br>(69569.9-102182.7)   | -10.3 | 7.5 (6.2-9)        | 7.5 (6.2-9.1)  | 0.0  | 0 (-0.01 to 0)         |
| Nepal                              | 3063.9 (2484.6-3692.7)        | 2282.8 (1851.2-2751.3)          | -25.5 | 7.9 (6.4-9.5)      | 7.7 (6.3-9.3)  | -2.5 | -0.07 (-0.07 to -0.06) |
| Pakistan                           | 18189.9<br>(14835.4-21772.9)  | 24975 (20410.5-29777.4)         | 37.3  | 7.9 (6.4-9.4)      | 7.8 (6.4-9.3)  | -1.3 | -0.04 (-0.05 to -0.03) |
| <b>Southern sub-Saharan Africa</b> | 7211 (5956.4-8602.9)          | 7814.8 (6467.7-9333.7)          | 8.4   | 9.8 (8.1-11.7)     | 9.8 (8.1-11.7) | 0.0  | 0 (-0.01 to 0.02)      |
| Botswana                           | 188.1 (153.2-226.2)           | 224.4 (182.7-269.8)             | 19.3  | 9.6 (7.8-11.6)     | 9.7 (7.9-11.7) | 1.0  | 0.02 (0.01 to 0.03)    |
| Lesotho                            | 293 (238.5-354.3)             | 219.3 (178.5-265.1)             | -25.2 | 10.1<br>(8.2-12.2) | 9.9 (8.1-12)   | -2.0 | -0.12 (-0.14 to -0.1)  |
| Namibia                            | 223.9 (181.6-271.2)           | 291.6 (236.4-353.1)             | 30.2  | 9.6 (7.8-11.7)     | 9.7 (7.9-11.8) | 1.0  | 0.04 (0.02 to          |

|                                   |                              |                              |       |                    |                |      |                        |
|-----------------------------------|------------------------------|------------------------------|-------|--------------------|----------------|------|------------------------|
|                                   |                              |                              |       |                    |                |      | 0.05)                  |
| South Africa                      | 4537.8 (3755.2-5400.1)       | 4851.6 (4011.2-5790.8)       | 6.9   | 9.7 (8-11.6)       | 9.8 (8.1-11.7) | 1.0  | 0.03 (0.01 to 0.05)    |
| Eswatini                          | 150.4 (123.9-180)            | 140.1 (115.4-167.6)          | -6.9  | 9.9 (8.1-11.8)     | 10 (8.2-11.9)  | 1.0  | 0.04 (0.01 to 0.07)    |
| Zimbabwe                          | 1817.8 (1477.1-2177.3)       | 2088 (1696.7-2500.9)         | 14.9  | 9.9 (8.1-11.9)     | 9.8 (8-11.8)   | -1.0 | -0.06 (-0.07 to -0.05) |
| <b>Western sub-Saharan Africa</b> | 42800.3<br>(35511.1-51287.4) | 77149.4<br>(64001.2-92453.7) | 80.3  | 10 (8.3-12)        | 9.8 (8.2-11.8) | -2.0 | -0.07 (-0.08 to -0.06) |
| Benin                             | 1109.6 (906.5-1338.6)        | 2365.8 (1932.8-2854.1)       | 113.2 | 9.7 (7.9-11.7)     | 9.8 (8-11.8)   | 1.0  | 0.03 (0.03 to 0.03)    |
| Burkina Faso                      | 2142.3 (1760.2-2574.4)       | 4392.7 (3609.3-5278.9)       | 105.1 | 9.7 (8-11.7)       | 9.8 (8-11.7)   | 1.0  | 0.01 (0 to 0.01)       |
| Cameroon                          | 2176.5 (1785.8-2618.8)       | 4230.2 (3470.7-5090)         | 94.4  | 9.8 (8-11.8)       | 9.8 (8-11.8)   | 0.0  | -0.04 (-0.06 to -0.03) |
| Cabo Verde                        | 54.1 (44-65.1)               | 50.2 (40.8-60.4)             | -7.2  | 9.6 (7.8-11.5)     | 9.8 (7.9-11.7) | 2.1  | -0.01 (-0.02 to 0.01)  |
| Chad                              | 1503.6 (1223.9-1796)         | 3695 (3007.3-4413.4)         | 145.7 | 9.9 (8-11.8)       | 9.8 (8-11.7)   | -1.0 | -0.03 (-0.04 to -0.03) |
| Côte d'Ivoire                     | 2692.9 (2196.5-3228.8)       | 4178.2 (3407.9-5009.6)       | 55.2  | 9.9 (8-11.8)       | 9.9 (8.1-11.9) | 0.0  | 0.03 (0.02 to 0.05)    |
| Gambia                            | 233.7 (192.3-280.7)          | 335.7 (276.2-403.2)          | 43.6  | 10.2<br>(8.4-12.2) | 9.9 (8.1-11.8) | -2.9 | -0.16 (-0.18 to -0.13) |
| Ghana                             | 2845.8 (2320.9-3418.3)       | 4002.7 (3264.6-4808.1)       | 40.7  | 9.9 (8-11.8)       | 9.8 (8-11.8)   | -1.0 | 0 (-0.01 to 0.01)      |
| Guinea                            | 1446.8 (1174.1-1726.3)       | 2235.5 (1814.2-2667.4)       | 54.5  | 9.6 (7.8-11.4)     | 9.8 (7.9-11.6) | 2.1  | -0.02 (-0.06 to 0.01)  |
| Guinea-Bissau                     | 218.4 (178.1-261.8)          | 293.7 (239.6-352.1)          | 34.5  | 9.8 (8-11.7)       | 9.8 (8-11.8)   | 0.0  | 0.01 (0 to 0.02)       |



|                                   |                            |                              |       |                    |                    |      |                        |
|-----------------------------------|----------------------------|------------------------------|-------|--------------------|--------------------|------|------------------------|
| Liberia                           | 416.1 (342.8-500.5)        | 635.3 (523.4-764.1)          | 52.7  | 10.8 (8.9-13)      | 9.9 (8.1-11.9)     | -8.3 | -0.01 (-0.14 to 0.11)  |
| Mali                              | 2125.3 (1745.4-2546.1)     | 4509.3 (3702.7-5401.9)       | 112.2 | 10 (8.2-12)        | 9.8 (8-11.7)       | -2.0 | -0.08 (-0.1 to -0.05)  |
| Mauritania                        | 423.1 (345.9-509)          | 508.9 (416-612.2)            | 20.3  | 9.9 (8.1-11.9)     | 9.7 (7.9-11.7)     | -2.0 | -0.09 (-0.1 to -0.07)  |
| Niger                             | 2083 (1721.3-2489.3)       | 5347.8 (4419.1-6390.9)       | 156.7 | 9.8 (8.1-11.7)     | 9.7 (8-11.6)       | -1.0 | -0.04 (-0.05 to -0.03) |
| Nigeria                           | 20160.4<br>(16794-24209.1) | 35741.7 (29659-42898.6)      | 77.3  | 10.2<br>(8.5-12.2) | 9.9 (8.2-11.9)     | -2.9 | -0.13 (-0.14 to -0.11) |
| Sao Tome and Principe             | 21.9 (17.8-26.3)           | 21.7 (17.7-26.1)             | -0.6  | 9.8 (8-11.8)       | 9.7 (7.9-11.6)     | -1.0 | -0.09 (-0.1 to -0.07)  |
| Senegal                           | 1609.6 (1302.7-1925.6)     | 2180.5 (1764.7-2608.5)       | 35.5  | 9.8 (7.9-11.7)     | 9.8 (7.9-11.7)     | 0.0  | 0 (0 to 0.01)          |
| Sierra Leone                      | 772.1 (634.5-926.6)        | 1311.9 (1078-1574.2)         | 69.9  | 10.3<br>(8.4-12.3) | 9.8 (8.1-11.8)     | -4.9 | -0.09 (-0.17 to -0.02) |
| Togo                              | 763.8 (623.6-919.1)        | 1111.6 (907.6-1337.7)        | 45.5  | 9.8 (8-11.8)       | 9.8 (8-11.8)       | 0.0  | 0.03 (0.02 to 0.03)    |
| <b>Eastern sub-Saharan Africa</b> | 42923.2<br>(35394-51306.9) | 67379.8<br>(55601.5-80553.8) | 57.0  | 10.1<br>(8.3-12.1) | 10 (8.2-11.9)      | -1.0 | -0.03 (-0.04 to -0.02) |
| Burundi                           | 1257 (1034.5-1506.7)       | 2208.6 (1817.4-2647.3)       | 75.7  | 9.9 (8.2-11.9)     | 9.9 (8.1-11.9)     | 0.0  | -0.05 (-0.12 to 0.02)  |
| Comoros                           | 96.1 (78.8-115.6)          | 79.4 (65.1-95.6)             | -17.3 | 10.2<br>(8.3-12.2) | 10 (8.2-12.1)      | -2.0 | 0.03 (0.01 to 0.06)    |
| Djibouti                          | 105.2 (86.2-125.5)         | 168.2 (137.7-200.6)          | 59.9  | 9.9 (8.1-11.9)     | 10.2<br>(8.3-12.1) | 3.0  | -0.06 (-0.13 to 0)     |
| Eritrea                           | 646.2 (525.9-770.9)        | 945.4 (769.3-1127.8)         | 46.3  | 10.9 (8.9-13)      | 9.9 (8.1-11.8)     | -9.2 | -0.04 (-0.12 to 0.05)  |

|                                   |                         |                           |       |                 |                 |      |                        |
|-----------------------------------|-------------------------|---------------------------|-------|-----------------|-----------------|------|------------------------|
| Ethiopia                          | 11798.5 (9669-14132.8)  | 17558.5 (14374-21119.8)   | 48.8  | 10 (8.2-11.9)   | 10 (8.2-12.1)   | 0.0  | -0.01 (-0.03 to 0)     |
| Kenya                             | 4825.5 (3985.6-5740.4)  | 6399.9 (5288.3-7597.2)    | 32.6  | 10.1 (8.3-12)   | 9.9 (8.2-11.8)  | -2.0 | -0.06 (-0.07 to -0.05) |
| Madagascar                        | 2563.5 (2099.6-3073.2)  | 4088.7 (3348.9-4901.6)    | 59.5  | 10.1 (8.2-12.1) | 10 (8.2-12)     | -1.0 | -0.02 (-0.03 to -0.02) |
| Malawi                            | 2225.3 (1815-2662.8)    | 2578 (2102.6-3084.7)      | 15.8  | 10 (8.1-11.9)   | 9.8 (8-11.7)    | -2.0 | -0.19 (-0.25 to -0.13) |
| Mozambique                        | 2862.3 (2341.8-3411.9)  | 5334.2 (4364.2-6358.4)    | 86.4  | 10.2 (8.4-12.2) | 9.9 (8.1-11.8)  | -2.9 | -0.02 (-0.08 to 0.04)  |
| Rwanda                            | 1509.1 (1250.3-1809.6)  | 1667.8 (1381.7-1999.8)    | 10.5  | 9.9 (8.2-11.9)  | 9.9 (8.2-11.8)  | 0.0  | -0.09 (-0.33 to 0.15)  |
| Somalia                           | 1598.3 (1303.4-1930.6)  | 4147.3 (3382-5009.6)      | 159.5 | 10.9 (8.9-13.1) | 10 (8.1-12)     | -8.3 | -0.03 (-0.11 to 0.04)  |
| South Sudan                       | 1196 (979.2-1424.6)     | 1726.1 (1413.3-2056.1)    | 44.3  | 10 (8.2-11.9)   | 10 (8.2-11.9)   | 0.0  | 0.15 (0.06 to 0.24)    |
| United Republic of Tanzania       | 5842.2 (4779.6-7015.8)  | 9853.1 (8061.3-11832.5)   | 68.7  | 10.1 (8.2-12.1) | 10 (8.2-12)     | -1.0 | -0.03 (-0.03 to -0.02) |
| Uganda                            | 4513.8 (3681.6-5399.1)  | 7661.8 (6249.3-9164.6)    | 69.7  | 10.2 (8.3-12.2) | 10.2 (8.3-12.1) | 0.0  | -0.02 (-0.03 to -0.01) |
| Zambia                            | 1852.7 (1529.7-2215.5)  | 2908.8 (2401.7-3478.4)    | 57.0  | 10.1 (8.3-12.1) | 9.9 (8.2-11.8)  | -2.0 | -0.07 (-0.08 to -0.06) |
| <b>Central sub-Saharan Africa</b> | 12595.6 (10322.3-15048) | 20812.4 (17058.3-24864.1) | 65.2  | 9.9 (8.1-11.8)  | 9.8 (8-11.7)    | -1.0 | -0.02 (-0.02 to -0.01) |
| Angola                            | 2405 (1956.3-2897)      | 5168.2 (4203.9-6225.2)    | 114.9 | 9.9 (8-11.9)    | 9.8 (7.9-11.8)  | -1.0 | -0.06 (-0.07 to -0.04) |
| Central African Republic          | 596.4 (490.6-716.7)     | 922.9 (759.3-1109.2)      | 54.8  | 9.9 (8.1-11.9)  | 9.8 (8.1-11.8)  | -1.0 | -0.01 (-0.02 to 0)     |

|                                  |                         |                              |      |                |              |      |                        |
|----------------------------------|-------------------------|------------------------------|------|----------------|--------------|------|------------------------|
|                                  |                         |                              |      |                |              |      | -0.01)                 |
| Congo                            | 473.7 (388.2-567.6)     | 675.2 (553.4-809)            | 42.5 | 9.9 (8.1-11.9) | 9.8 (8-11.7) | -1.0 | -0.06 (-0.07 to -0.05) |
| Democratic Republic of the Congo | 8825.2 (7211.4-10508.6) | 13666.7<br>(11166.5-16274.9) | 54.9 | 9.9 (8.1-11.7) | 9.8 (8-11.6) | -1.0 | -0.03 (-0.03 to -0.02) |
| Equatorial Guinea                | 107.7 (88.6-129.3)      | 179.5 (147.6-215.5)          | 66.7 | 9.8 (8.1-11.8) | 9.7 (8-11.6) | -1.0 | -0.04 (-0.05 to -0.03) |
| Gabon                            | 187.6 (152.3-226.5)     | 199.9 (162.3-241.3)          | 6.6  | 10 (8.1-12)    | 9.8 (8-11.8) | -2.0 | -0.06 (-0.07 to -0.06) |

Note: ASD, autism spectrum disorders; ASIR, age-standardized incidence rate; GBD, Global Burden of Disease; SDI, sociodemographic index.

**eTable 3. Number and age-standardized rates of DALYs for ASD globally and by SDI group, GBD region and super-region, country, and territory in 1990 and 2019.**

|                     | DALYs<br>No. (95% UI)                |                                        |              | Age-standardized DALY rate/100,000<br>No. (95% UI) |                          |              | EAP<br>C<br>No.<br>(95<br>%<br>CI)          |
|---------------------|--------------------------------------|----------------------------------------|--------------|----------------------------------------------------|--------------------------|--------------|---------------------------------------------|
|                     | 1990                                 | 2019                                   | Change,<br>% | 1990                                               | 2019                     | Change,<br>% |                                             |
| <b>Global</b>       | 3105909.1<br>(2025303-45144<br>67.3) | 4306615.4<br>(2821511.9-6232<br>360.5) | 38.7         | 56.7<br>(37-82.2)                                  | 56.3<br>(36.8-81.<br>5)  | -0.7         | -0.0<br>2<br>(-0.<br>03<br>to<br>-0.0<br>1) |
| High SDI            | 654788.5<br>(429488.9-9324<br>31.3)  | 822966.8<br>(541875.3-11750<br>34)     | 25.7         | 82.2<br>(53.8-11<br>7.4)                           | 88.2<br>(57.9-12<br>6.3) | 7.3          | 0.3<br>(0.2<br>4 to<br>0.35<br>)            |
| High-midd<br>le SDI | 713058.6<br>(465214-103259<br>6.5)   | 838198.3<br>(546345-1211677<br>.1)     | 17.5         | 61.8<br>(40.3-89.<br>5)                            | 62.1<br>(40.4-89.<br>8)  | 0.5          | 0.02<br>(0.0<br>2 to<br>0.02<br>)           |
| Middle<br>SDI       | 875926.9<br>(569680.5-1284<br>765.4) | 1155444.4<br>(754950.5-16799<br>72.4)  | 31.9         | 48.8<br>(31.8-71.<br>5)                            | 49.2<br>(32.1-71.<br>6)  | 0.8          | 0.02<br>(0.0<br>1 to<br>0.03<br>)           |
| Low-midd<br>le SDI  | 566660.6<br>(372962.5-8278<br>70.7)  | 856771<br>(561754.3-12453<br>20.1)     | 51.2         | 47.2<br>(31-68.5)                                  | 47.6<br>(31.2-69.<br>1)  | 0.8          | 0.03<br>(0.0<br>2 to<br>0.03<br>)           |
| Low SDI             | 293882.7<br>(191832.2-4273<br>62.2)  | 630884.7<br>(414559-917939.<br>8)      | 114.7        | 51.3<br>(33.6-74.<br>5)                            | 51.9<br>(34.1-75.<br>2)  | 1.2          | 0.04<br>(0.0<br>4 to<br>0.04<br>)           |

|                                  |                                 |                                 |      |                      |                      |      |                           |
|----------------------------------|---------------------------------|---------------------------------|------|----------------------|----------------------|------|---------------------------|
| <b>High-income North America</b> | 216780.9<br>(142091.7-307645.7) | 326234.1<br>(215046.6-462932.4) | 50.5 | 79.9<br>(52.3-113.3) | 96.9<br>(63.7-137.7) | 21.3 | 0.81<br>(0.68 to 0.95)    |
| Canada                           | 24223.8<br>(15957.6-33905.8)    | 31128.1<br>(21013.8-44021.5)    | 28.5 | 91.6<br>(60.3-129)   | 92.9<br>(62.4-131.9) | 1.4  | 0.05<br>(0.03 to 0.06)    |
| Greenland                        | 43.7 (28.2-63.1)                | 41 (26.7-58.5)                  | -6.1 | 76.7<br>(49.6-110.4) | 75.9<br>(49.4-108.6) | -1.0 | -0.03<br>(-0.03 to -0.02) |
| United States of America         | 192508.5<br>(125434.9-274538.7) | 295059.8<br>(194672-419941.6)   | 53.3 | 78.6<br>(51.3-111.8) | 97.3<br>(64-138.8)   | 23.8 | 0.9<br>(0.75 to 1.05)     |
| <b>Australasia</b>               | 13165.8<br>(8637.1-18709.4)     | 18037.7<br>(11831.4-26143.5)    | 37.0 | 66.4<br>(43.6-94.3)  | 66.3<br>(43.5-96.1)  | -0.2 | 0 (0 to 0)                |
| Australia                        | 10927.8<br>(7191-15451.2)       | 15241.7<br>(9971.4-22130.1)     | 39.5 | 66.3<br>(43.5-93.9)  | 66.3<br>(43.3-96.3)  | 0.0  | 0 (0 to 0.01)             |
| New Zealand                      | 2237.9<br>(1465.5-3253.2)       | 2796<br>(1831.5-4001.8)         | 24.9 | 66.7<br>(43.6-97)    | 66.4<br>(43.2-95.3)  | -0.4 | -0.01<br>(-0.01 to -0.01) |
| <b>High-income Asia Pacific</b>  | 159572.1<br>(104215.6-229854.6) | 162304.3<br>(106518.2-233834.5) | 1.7  | 94.5<br>(61.6-136.4) | 97.3<br>(63.6-141)   | 3.0  | 0.11<br>(0.09 to 0.13)    |
| Brunei Darussala                 | 240<br>(156.2-343.3)            | 382.5<br>(251.9-548.4)          | 59.4 | 87.4<br>(57.1-12)    | 87.1<br>(57.1-12)    | -0.3 | 0.01<br>(-0.              |

|                           |                                    |                                     |      |                          |                           |      |                                             |
|---------------------------|------------------------------------|-------------------------------------|------|--------------------------|---------------------------|------|---------------------------------------------|
| m                         |                                    |                                     |      | 4.3)                     | 5.4)                      |      | 02<br>to<br>0.04<br>)                       |
| Japan                     | 119160.2<br>(77831.7-17143<br>0.3) | 116063.8<br>(76362.6-168477.<br>3)  | -2.6 | 99.3<br>(64.8-14<br>2.8) | 103.8<br>(67.7-14<br>9.7) | 4.5  | 0.17<br>(0.1<br>4 to<br>0.2)                |
| Singapore                 | 2747.5<br>(1785.1-4024.6)          | 4840.7<br>(3172.6-7059)             | 76.2 | 89.6<br>(58.5-13<br>0.5) | 90.3<br>(58.8-13<br>1.7)  | 0.8  | 0.05<br>(0.0<br>2 to<br>0.07<br>)           |
| Republic<br>of Korea      | 37424.4<br>(24234.6-54071.<br>9)   | 41017.3<br>(26331.9-59285.8<br>)    | 9.6  | 82.5<br>(53.6-11<br>9.6) | 84.1<br>(53.8-12<br>1.9)  | 1.9  | 0.06<br>(0.0<br>5 to<br>0.06<br>)           |
| <b>Western<br/>Europe</b> | 319675.5<br>(208840-454860<br>.1)  | 353844.8<br>(233430.4-50452<br>6.4) | 10.7 | 87.5<br>(57.1-12<br>5)   | 88.7<br>(58.1-12<br>7.1)  | 1.4  | 0.05<br>(0.0<br>5 to<br>0.05<br>)           |
| Andorra                   | 48 (31.5-69.1)                     | 68.4 (44.6-98.7)                    | 42.4 | 90.2<br>(59.2-12<br>9.5) | 88.6<br>(57.7-12<br>7.5)  | -1.8 | -0.0<br>7<br>(-0.<br>09<br>to<br>-0.0<br>6) |
| Austria                   | 6265.1<br>(4072.5-9095.1)          | 7046.9<br>(4603.9-10178)            | 12.5 | 85.5<br>(55.3-12<br>4.7) | 86.6<br>(56.4-12<br>5.5)  | 1.3  | 0.04<br>(0.0<br>3 to<br>0.04<br>)           |
| Belgium                   | 8096.6<br>(5323.8-11707.6<br>)     | 9034.3<br>(5949.1-12951.3)          | 11.6 | 85.8<br>(56.2-12<br>3.8) | 85.9<br>(56.1-12<br>3.5)  | 0.1  | 0<br>(-0.<br>01<br>to<br>0)                 |
| Cyprus                    | 666.1<br>(436.2-957.8)             | 1063.8<br>(696.3-1540.1)            | 59.7 | 86.4<br>(56.7-12<br>4.2) | 85.9<br>(56.1-12<br>3.9)  | -0.6 | -0.0<br>3<br>(-0.                           |

|         |                                  |                                  |      |                          |                          |      |                                     |
|---------|----------------------------------|----------------------------------|------|--------------------------|--------------------------|------|-------------------------------------|
|         |                                  |                                  |      |                          |                          |      | 04<br>to<br>-0.0<br>3)              |
| Denmark | 3182<br>(2191.8-4404)            | 3529.9<br>(2467.2-4815.9)        | 10.9 | 65.2<br>(44.7-90.<br>5)  | 65.5<br>(45.5-89.<br>8)  | 0.5  | 0.01<br>(0.0<br>1 to<br>0.01<br>)   |
| Finland | 4002<br>(2618.8-5718.5)          | 4276.7<br>(2819.2-6098.9)        | 6.9  | 84.1<br>(55.2-12<br>0.3) | 85.1<br>(56.2-12<br>1.6) | 1.2  | 0.04<br>(0.0<br>4 to<br>0.05<br>)   |
| France  | 38000.9<br>(25004.2-55112.<br>2) | 42603.5<br>(28560.8-60447.2<br>) | 12.1 | 68.7<br>(45.1-10<br>0.3) | 70<br>(46.7-99.<br>6)    | 1.9  | 0.08<br>(0.0<br>7 to<br>0.1)        |
| Germany | 64381.2<br>(41931.7-91828.<br>7) | 66860.3<br>(43604.6-96715)       | 3.9  | 86<br>(56-124.<br>3)     | 87.3<br>(56.7-12<br>7.1) | 1.5  | 0.04<br>(0.0<br>3 to<br>0.04<br>)   |
| Greece  | 8521.2<br>(5514-12320.8)         | 8002.3<br>(5219.6-11574.1)       | -6.1 | 85.9<br>(55.8-12<br>4.3) | 85.9<br>(56-125)         | 0.0  | -0.0<br>1<br>(-0.<br>02<br>to<br>0) |
| Iceland | 216.1<br>(141.4-313)             | 283.7<br>(186.3-406.8)           | 31.3 | 86<br>(56.3-12<br>4.3)   | 86.5<br>(56.6-12<br>4.1) | 0.6  | 0.02<br>(0.0<br>1 to<br>0.03<br>)   |
| Ireland | 3318.6<br>(2157.2-4829.6)        | 4330.1<br>(2817.2-6281.9)        | 30.5 | 92.9<br>(60.5-13<br>5)   | 92.5<br>(60.4-13<br>4.5) | -0.4 | -0.0<br>1<br>(-0.<br>02<br>to<br>0) |
| Israel  | 3885.3<br>(2565.3-5575.8)        | 7170.7<br>(4729.3-10303.4)       | 84.6 | 77.6<br>(51.1-11<br>1.5) | 78.1<br>(51.5-11<br>2.1) | 0.6  | 0.03<br>(0.0<br>3 to                |

|             |                              |                              |      |                      |                      |     |                        |
|-------------|------------------------------|------------------------------|------|----------------------|----------------------|-----|------------------------|
|             |                              |                              |      |                      |                      |     | 0.03<br>)              |
| Italy       | 45815.4<br>(30043.2-65768.5) | 46564.6<br>(30491.8-67279.9) | 1.6  | 85.7<br>(56.3-122.5) | 86.6<br>(56.7-124.4) | 1.1 | 0.04<br>(0.04 to 0.04) |
| Luxembourg  | 312<br>(201.2-451.4)         | 505.3<br>(326.5-727.7)       | 62.0 | 86.2<br>(55.4-125.2) | 87.2<br>(56.1-125.6) | 1.2 | 0.04<br>(0.04 to 0.05) |
| Malta       | 315.9<br>(204.7-456.6)       | 354.8<br>(231.3-509.8)       | 12.3 | 87.1<br>(56.9-126)   | 88.3<br>(57-127.4)   | 1.4 | 0.05<br>(0.05 to 0.05) |
| Netherlands | 13825.3<br>(8942.9-19832.1)  | 15302.3<br>(9937.9-21705)    | 10.7 | 96.2<br>(62.2-138.1) | 96.3<br>(62.2-137.9) | 0.1 | 0 (0 to 0.01)          |
| Norway      | 2909.2<br>(1898.2-4200.3)    | 3691.2<br>(2416.5-5319.3)    | 26.9 | 72.3<br>(47-104.2)   | 73.9<br>(48.4-107.2) | 2.2 | 0.06<br>(0.05 to 0.07) |
| Portugal    | 8099.1<br>(5292.6-11762.1)   | 7932.1<br>(5122.1-11540.5)   | -2.1 | 83.2<br>(54.4-121)   | 83.6<br>(54-123.2)   | 0.5 | 0.02<br>(0.01 to 0.02) |
| Spain       | 32782.3<br>(21491.6-46882.6) | 37095.6<br>(24305.4-53409.1) | 13.2 | 88<br>(57.6-125.7)   | 88.6<br>(58.1-128.1) | 0.7 | 0.04<br>(0.03 to 0.05) |
| Sweden      | 8502<br>(5566.2-12160.4)     | 10198.1<br>(6717.5-14571.5)  | 19.9 | 105.5<br>(69-151.8)  | 108<br>(71.2-155.3)  | 2.4 | 0.11<br>(0.1 to 0.11)  |
| Switzerland | 5634.9<br>(3711.3-8110.9)    | 7072.1<br>(4610.9-10148.8)   | 25.5 | 86.7<br>(57.1-12)    | 87.6<br>(57.1-12)    | 1.0 | 0.03<br>(0.0)          |



|                               |                                |                                |       |                      |                       |     |                               |
|-------------------------------|--------------------------------|--------------------------------|-------|----------------------|-----------------------|-----|-------------------------------|
|                               |                                |                                |       | 5.6)                 | 6.3)                  |     | 2 to<br>0.04<br>)             |
| United Kingdom                | 60588.6<br>(40078.6-86441.4)   | 70495.6<br>(46384.6-100354.6)  | 16.4  | 111<br>(72.9-158.5)  | 112.3<br>(73.7-160.5) | 1.2 | 0.05<br>(0.05 to<br>0.05<br>) |
| <b>Southern Latin America</b> | 36786.2<br>(23775-52798.3)     | 47677.8<br>(30967-68854.5)     | 29.6  | 73.5<br>(47.5-105.4) | 73.7<br>(47.9-106.2)  | 0.3 | 0.01<br>(0.01 to<br>0.01<br>) |
| Argentina                     | 24445.3<br>(15771.9-35421.9)   | 32298.5<br>(20836.3-46477.1)   | 32.1  | 73.3<br>(47.3-106.1) | 73.4<br>(47.3-105.6)  | 0.1 | 0.01<br>(0.01 to<br>0.01<br>) |
| Chile                         | 10074.1<br>(6517.6-14823.6)    | 12987.4<br>(8526.3-18919.6)    | 28.9  | 74<br>(48-109.3)     | 74.6<br>(48.9-108.6)  | 0.8 | 0.02<br>(0.02 to<br>0.02<br>) |
| Uruguay                       | 2265.4<br>(1472.8-3275.7)      | 2389.6<br>(1548-3423.3)        | 5.5   | 73.7<br>(47.8-106.6) | 73.7<br>(47.7-106)    | 0.0 | 0 (0 to<br>0)                 |
| <b>Eastern Europe</b>         | 131358.8<br>(85364.5-190702.9) | 116804.4<br>(76388.7-169066.5) | -11.1 | 60.2<br>(39.2-87.3)  | 60.8<br>(39.6-87.8)   | 1.0 | 0.03<br>(0.03 to<br>0.03<br>) |
| Belarus                       | 6123.7<br>(3946.4-8820.9)      | 5322.3<br>(3458.1-7705.2)      | -13.1 | 60.5<br>(39.1-87.1)  | 61.3<br>(39.4-88.8)   | 1.3 | 0.03<br>(0.03 to<br>0.03<br>) |
| Estonia                       | 914.5<br>(592.2-1329.3)        | 731.6<br>(479.9-1073.3)        | -20.0 | 60.8<br>(39.4-88.8)  | 61.9<br>(40.7-91.2)   | 1.8 | 0.07<br>(0.06 to<br>0.08<br>) |
| Latvia                        | 1531.5<br>(1006.2-2224.8)      | 1046.2<br>(678.8-1535.5)       | -31.7 | 60.5<br>(39.8-87.    | 61.4<br>(39.7-89.     | 1.5 | 0.05<br>(0.0                  |

|                                  |                                  |                                  |       |                         |                         |      |                                       |
|----------------------------------|----------------------------------|----------------------------------|-------|-------------------------|-------------------------|------|---------------------------------------|
|                                  |                                  |                                  |       | 9)                      | 8)                      |      | 5 to<br>0.06<br>)                     |
| Lithuania                        | 2195.3<br>(1421-3185)            | 1554.4<br>(1013.4-2259.7)        | -29.2 | 61.8<br>(40.1-89.<br>9) | 62.5<br>(40.5-90.<br>9) | 1.1  | 0.04<br>(0.0<br>3 to<br>0.04<br>)     |
| Republic<br>of<br>Moldova        | 2660<br>(1713.6-3895)            | 2067.5<br>(1338.6-3043.5)        | -22.3 | 60<br>(38.6-87.<br>8)   | 60.8<br>(39.6-89.<br>9) | 1.3  | 0.05<br>(0.0<br>5 to<br>0.05<br>)     |
| Russian<br>Federatio<br>n        | 87778.1<br>(57090.9-12709<br>6)  | 81887.6<br>(53362-118119.5<br>)  | -6.7  | 60.1<br>(39-86.9)       | 60.7<br>(39.4-87.<br>9) | 1.0  | 0.03<br>(0.0<br>3 to<br>0.04<br>)     |
| Ukraine                          | 30155.7<br>(19620.2-43747.<br>1) | 24194.7<br>(15806.2-34845.6<br>) | -19.8 | 60.2<br>(39-87.4)       | 60.8<br>(39.7-87.<br>7) | 1.0  | 0.03<br>(0.0<br>3 to<br>0.03<br>)     |
| <b>Central<br/>Europe</b>        | 67584.8<br>(43770.1-97177)       | 59275.5<br>(38737.4-85387.3<br>) | -12.3 | 56.5<br>(36.6-81.<br>2) | 57.1<br>(37.2-82)       | 1.1  | 0.04<br>(0.0<br>4 to<br>0.05<br>)     |
| Albania                          | 1953<br>(1259.5-2850.8)          | 1451.5<br>(941.1-2115.3)         | -25.7 | 56.9<br>(36.6-82.<br>7) | 56.8<br>(36.7-82.<br>3) | -0.2 | 0.01<br>(-0.<br>01<br>to<br>0.03<br>) |
| Bosnia<br>and<br>Herzegov<br>ina | 2621.9<br>(1700.2-3815.1)        | 1743.1<br>(1144.7-2501)          | -33.5 | 57.8<br>(37.5-83.<br>9) | 57.7<br>(37.4-82.<br>9) | -0.2 | 0.03<br>(0.0<br>1 to<br>0.04<br>)     |
| Bulgaria                         | 4630.7<br>(3039.9-6742.7)        | 3496.5<br>(2287-5040.9)          | -24.5 | 56.2<br>(36.8-81.<br>6) | 56.6<br>(37-81.8)       | 0.7  | 0.03<br>(0.0<br>2 to<br>0.03          |

|                 |                              |                              |       |                     |                     |     |                        |
|-----------------|------------------------------|------------------------------|-------|---------------------|---------------------|-----|------------------------|
|                 |                              |                              |       |                     |                     |     | )                      |
| Croatia         | 2690.8<br>(1732.8-3938.2)    | 2212.3<br>(1454.3-3232.3)    | -17.8 | 57.4<br>(36.8-84.3) | 57.9<br>(37.9-84.8) | 0.9 | 0.03<br>(0.03 to 0.04) |
| Czechia         | 5665.1<br>(3656.5-8147.8)    | 5595.1<br>(3640.2-8081.9)    | -1.2  | 57.3<br>(36.8-82.4) | 57.8<br>(37.6-83.6) | 0.9 | 0.04<br>(0.03 to 0.04) |
| Hungary         | 5583.9<br>(3627.1-7995.3)    | 4950.2<br>(3192.3-7131.3)    | -11.3 | 56.7<br>(36.6-81.6) | 57.1<br>(36.8-82.7) | 0.7 | 0.04<br>(0.04 to 0.04) |
| North Macedonia | 1155.8<br>(757.2-1666.1)     | 1174.2<br>(764.9-1668)       | 1.6   | 57.3<br>(37.5-82.6) | 58<br>(37.7-83.2)   | 1.2 | 0.04<br>(0.04 to 0.05) |
| Montenegro      | 357.5<br>(230-520.9)         | 334.9 (215-490.5)            | -6.3  | 57.4<br>(36.9-83.6) | 57.8<br>(37.2-84.7) | 0.7 | 0.02<br>(0.02 to 0.03) |
| Poland          | 21098.3<br>(13833.3-30406.2) | 20003.2<br>(13096.8-28831.8) | -5.2  | 56.5<br>(37-81.3)   | 57.2<br>(37.3-82.2) | 1.2 | 0.04<br>(0.04 to 0.05) |
| Romania         | 12659.6<br>(8229.5-18331.9)  | 9738.6<br>(6430.1-14091.6)   | -23.1 | 55.6<br>(36.2-80.8) | 56<br>(36.9-81.1)   | 0.7 | 0.04<br>(0.03 to 0.04) |
| Serbia          | 5128.5<br>(3350.9-7398.1)    | 4618<br>(3031.5-6711.2)      | -10.0 | 56.2<br>(36.8-81.4) | 57.4<br>(37.6-83.4) | 2.1 | 0.08<br>(0.08 to 0.09) |
| Slovakia        | 2945.1<br>(1907.4-4283.4)    | 2863.8<br>(1853.9-4129.5)    | -2.8  | 56.7<br>(36.6-82.   | 57.2<br>(37.1-82.   | 0.9 | 0.04<br>(0.0           |

|                         |                                |                                  |       |                         |                         |      |                                   |
|-------------------------|--------------------------------|----------------------------------|-------|-------------------------|-------------------------|------|-----------------------------------|
|                         |                                |                                  |       | 2)                      | 7)                      |      | 4 to<br>0.04<br>)                 |
| Slovenia                | 1094.6<br>(706.1-1623.8)       | 1094.1<br>(723-1607.7)           | 0.0   | 57.6<br>(37.1-85.<br>2) | 58.5<br>(38-84.6)       | 1.6  | 0.06<br>(0.0<br>6 to<br>0.07<br>) |
| <b>Central<br/>Asia</b> | 41257<br>(26947.9-60087.<br>5) | 54402.4<br>(35733.3-78753.8<br>) | 31.9  | 56.9<br>(37.3-82.<br>7) | 57.4<br>(37.7-83.<br>2) | 0.9  | 0.04<br>(0.0<br>3 to<br>0.04<br>) |
| Armenia                 | 2018.6<br>(1317.3-2910.4)      | 1682.2<br>(1098.7-2431.6)        | -16.7 | 57.9<br>(37.8-83.<br>5) | 58.7<br>(38.2-85)       | 1.4  | 0.05<br>(0.0<br>5 to<br>0.06<br>) |
| Azerbaijan              | 4355<br>(2866.1-6267.9)        | 5886.2<br>(3815.5-8464.7)        | 35.2  | 57.1<br>(37.6-82.<br>4) | 58.2<br>(37.7-83.<br>3) | 1.9  | 0.09<br>(0.0<br>8 to<br>0.09<br>) |
| Georgia                 | 3106.7<br>(2023.1-4544.1)      | 1979<br>(1284.4-2875.7)          | -36.3 | 57.4<br>(37.3-83.<br>8) | 58.2<br>(37.5-84.<br>6) | 1.4  | 0.22<br>(-0.<br>6 to<br>1.05<br>) |
| Kazakhstan              | 9509.2<br>(6199.8-13962)       | 10402.4<br>(6764.5-15198.7)      | 9.4   | 56.5<br>(36.9-82.<br>6) | 56.7<br>(36.9-83.<br>1) | 0.4  | 0.01<br>(0.0<br>1 to<br>0.02<br>) |
| Kyrgyzstan              | 2660.1<br>(1755.4-3832.7)      | 3855.5<br>(2528-5603.9)          | 44.9  | 56.7<br>(37.3-82)       | 57.3<br>(37.7-83.<br>4) | 1.1  | 0.03<br>(0.0<br>3 to<br>0.03<br>) |
| Mongolia                | 1316.5<br>(860.5-1906.9)       | 1958.1<br>(1267.7-2856.2)        | 48.7  | 56.9<br>(36.9-82.<br>4) | 56.6<br>(36.9-82.<br>2) | -0.5 | -0.0<br>1<br>(-0.<br>01<br>to     |

|                              |                               |                                |       |                     |                     |      |                           |
|------------------------------|-------------------------------|--------------------------------|-------|---------------------|---------------------|------|---------------------------|
|                              |                               |                                |       |                     |                     |      | 0)                        |
| Tajikistan                   | 3302.2<br>(2147-4796.1)       | 5741.4<br>(3805.1-8274.7)      | 73.9  | 57.2<br>(37.4-83.5) | 57.8<br>(38.3-83.4) | 1.0  | 0.04<br>(0.04 to 0.05)    |
| Turkmenistan                 | 2256.8<br>(1474.4-3282.3)     | 3009.6<br>(1971.2-4379.9)      | 33.4  | 56.8<br>(37.1-82.9) | 58.1<br>(38-84.5)   | 2.3  | 0.09<br>(0.08 to 0.09)    |
| Uzbekistan                   | 12731.9<br>(8300.7-18654.5)   | 19888<br>(12905.4-29188.1)     | 56.2  | 56.8<br>(36.9-83.1) | 57.3<br>(37.2-84)   | 0.9  | 0.03<br>(0.03 to 0.04)    |
| <b>Central Latin America</b> | 93734.6<br>(61359.4-134649.9) | 133792.5<br>(87312.6-194854.3) | 42.7  | 53.7<br>(35.1-77.3) | 53.6<br>(35-78.2)   | -0.2 | -0.01<br>(-0.01 to 0)     |
| Colombia                     | 17598.8<br>(11588.4-25583.5)  | 24093.4<br>(15696.9-34922.1)   | 36.9  | 51.3<br>(33.8-74.4) | 51.5<br>(33.5-75.1) | 0.4  | 0.02<br>(0.01 to 0.02)    |
| Costa Rica                   | 1687.5<br>(1096.5-2442.3)     | 2419.4<br>(1560.6-3529.7)      | 43.4  | 52.9<br>(34.4-76.2) | 52.4<br>(34-76.3)   | -0.9 | -0.04<br>(-0.04 to -0.03) |
| El Salvador                  | 2833.9<br>(1852.1-4113.3)     | 3147.8<br>(2035.2-4574)        | 11.1  | 50.4<br>(33-73.6)   | 50<br>(32.3-72.3)   | -0.8 | -0.02<br>(-0.03 to -0.02) |
| Guatemala                    | 4358.6<br>(2797.1-6413.4)     | 9351.7<br>(6080-13730.4)       | 114.6 | 50.4<br>(32.7-74)   | 50.2<br>(32.5-73.   | -0.4 | -0.02                     |

|                                       |                              |                               |      |                     |                     |      |                     |
|---------------------------------------|------------------------------|-------------------------------|------|---------------------|---------------------|------|---------------------|
|                                       |                              |                               |      |                     | 4)                  |      | (-0.02 to -0.01)    |
| Honduras                              | 2612<br>(1694.9-3814.5)      | 5193.7<br>(3362.8-7633.4)     | 98.8 | 50.9<br>(33.1-74.1) | 50.6<br>(32.7-74.4) | -0.6 | -0.02 to -0.02)     |
| Mexico                                | 51559<br>(33878.5-74218.9)   | 70670.3<br>(46195.2-102006.5) | 37.1 | 56.6<br>(37.1-81.6) | 56.8<br>(37.1-82)   | 0.4  | 0 (0 to 0.01)       |
| Nicaragua                             | 2161.7<br>(1414.1-3166.8)    | 3457.9<br>(2257.2-5099.8)     | 60.0 | 50.9<br>(33.6-74.7) | 51.5<br>(33.6-75.8) | 1.2  | 0.04 (0.04 to 0.04) |
| Panama                                | 1303.3<br>(854.3-1900.6)     | 2173<br>(1403.2-3161)         | 66.7 | 52.4<br>(34.3-76.2) | 52.3<br>(33.8-76.1) | -0.2 | -0.01 to 0)         |
| Venezuela<br>(Bolivarian Republic of) | 9619.7<br>(6251.2-13997.6)   | 13285.3<br>(8665.1-19332.7)   | 38.1 | 48.2<br>(31.3-70.1) | 48<br>(31.4-70.1)   | -0.4 | 0.01 (0 to 0.02)    |
| <b>Andean Latin America</b>           | 20988.7<br>(13725.6-30730.5) | 33571.2<br>(22050.5-48663.1)  | 59.9 | 51.9<br>(33.9-75.6) | 52.3<br>(34.4-75.9) | 0.8  | 0.03 (0.03 to 0.04) |
| Bolivia<br>(Plurinational State of)   | 3534.5<br>(2327.2-5189.9)    | 6437.6<br>(4226.4-9440.1)     | 82.1 | 51.3<br>(33.8-75.4) | 52<br>(34.2-76.1)   | 1.4  | 0.05 (0.04 to 0.05) |
| Ecuador                               | 5514.2                       | 9274.9                        | 68.2 | 51.9                | 52.1                | 0.4  | 0.01                |

|                     |                              |                              |       |                     |                     |      |                           |
|---------------------|------------------------------|------------------------------|-------|---------------------|---------------------|------|---------------------------|
|                     | (3596.7-7997.2)              | (6087-13366.1)               |       | (33.7-75.7)         | (34.2-75.4)         |      | (0.01 to 0.02)            |
| Peru                | 11940<br>(7826.1-17486.6)    | 17858.8<br>(11747.8-26236.1) | 49.6  | 52<br>(34.2-76.4)   | 52.6<br>(34.6-77.3) | 1.2  | 0.04<br>(0.04 to 0.05)    |
| <b>Caribbean</b>    | 19089.4<br>(12528.4-27489.8) | 24307.5<br>(15890.4-35203.9) | 27.3  | 52.5<br>(34.5-75.8) | 52.4<br>(34.2-75.9) | -0.2 | 0<br>(-0.01 to 0)         |
| Antigua and Barbuda | 32.4 (20.8-47.1)             | 45.1 (29.9-65.8)             | 39.2  | 52.3<br>(33.6-75.9) | 52.8<br>(35-77.1)   | 1.0  | 0.05<br>(0.03 to 0.07)    |
| Bahamas             | 138.5<br>(90.4-202.5)        | 190.5<br>(125.1-278.1)       | 37.6  | 51.8<br>(33.8-75.9) | 51.9<br>(34.2-75.7) | 0.2  | -0.01<br>(-0.01 to 0)     |
| Barbados            | 132.4<br>(84.9-193.7)        | 146 (95.3-211.5)             | 10.2  | 52.7<br>(33.9-77.4) | 52.9<br>(34.7-76.4) | 0.4  | 0.01<br>(0 to 0.01)       |
| Belize              | 104.4<br>(68.7-152.6)        | 218.6<br>(143.4-323.1)       | 109.3 | 52.5<br>(34.7-76.7) | 52<br>(34.2-76.7)   | -1.0 | -0.03<br>(-0.04 to -0.03) |
| Bermuda             | 31.1 (20.3-45.3)             | 31 (20.3-45.3)               | -0.3  | 53.5<br>(34.8-77.6) | 53.6<br>(34.7-77.8) | 0.2  | 0.01<br>(0 to 0.02)       |
| Cuba                | 5833.8                       | 5670.2                       | -2.8  | 53.9                | 54                  | 0.2  | 0.01                      |

|                    |                        |                        |       |                  |                  |      |                     |
|--------------------|------------------------|------------------------|-------|------------------|------------------|------|---------------------|
|                    | (3750.9-8568)          | (3711.9-8312.4)        |       | (34.7-79.2)      | (35.2-79.2)      |      | (0.01 to 0.01)      |
| Dominica           | 39.8 (26.3-58.3)       | 35 (23.2-51.1)         | -12.1 | 52.5 (34.6-76.7) | 53 (35-77.4)     | 1.0  | 0.03 (0.02 to 0.03) |
| Dominican Republic | 3939.1 (2547.8-5734.4) | 5747.7 (3726.8-8340.1) | 45.9  | 51.6 (33.7-74.7) | 52.3 (33.9-75.8) | 1.4  | 0.07 (0.06 to 0.07) |
| Grenada            | 46.8 (30.8-67.8)       | 54.1 (35-78.4)         | 15.6  | 52.5 (34.6-76.2) | 53.4 (34.5-77.4) | 1.7  | 0.07 (0.06 to 0.08) |
| Guyana             | 418 (273.2-610.2)      | 400.7 (260.3-589.3)    | -4.1  | 51.1 (33.7-74.6) | 51.4 (33.3-75.5) | 0.6  | 0.01 (0 to 0.03)    |
| Haiti              | 3445.5 (2254.9-4957.1) | 6563.1 (4292.3-9545)   | 90.5  | 50.6 (33-72.6)   | 50.5 (33.2-73.3) | -0.2 | 0 (-0.01 to 0.01)   |
| Jamaica            | 1297.8 (857.5-1897.2)  | 1470.9 (948.1-2119.1)  | 13.3  | 52.9 (35.1-77.1) | 53.2 (34.1-76.8) | 0.6  | 0.02 (0.02 to 0.03) |
| Puerto Rico        | 1912.4 (1257.1-2775.7) | 1691.3 (1110.2-2471.9) | -11.6 | 52.9 (34.8-77)   | 53.1 (34.7-77.6) | 0.4  | 0.02 (0.01 to 0.02) |
| Saint Lucia        | 75.2 (49-109.9)        | 88.1 (57.5-129.9)      | 17.1  | 51.8 (33.9-75.5) | 52.7 (34.3-78.1) | 1.7  | 0.06 (0.05 to 0.06) |



|                                  |                            |                             |       |                  |                  |      |                        |
|----------------------------------|----------------------------|-----------------------------|-------|------------------|------------------|------|------------------------|
|                                  |                            |                             |       |                  |                  |      | 0.06<br>)              |
| Saint Vincent and the Grenadines | 60.7 (39.8-89.8)           | 58.1 (38.2-84.2)            | -4.3  | 52.3 (34.1-77.1) | 52.9 (34.7-76.8) | 1.1  | 0.04 (0.03 to 0.04)    |
| Suriname                         | 210.3 (137.3-304.8)        | 294.8 (193.1-433.3)         | 40.2  | 52.2 (34.2-76.2) | 51.9 (34.1-76.4) | -0.6 | -0.01 (-0.02 to -0.01) |
| Trinidad and Tobago              | 656.5 (427.9-954.1)        | 698.6 (454.7-1005.8)        | 6.4   | 52.7 (34.3-76.5) | 52.9 (34.4-76.3) | 0.4  | 0.02 (0.02 to 0.02)    |
| United States Virgin Islands     | 56.6 (37.2-82.1)           | 50.5 (33.4-73.1)            | -10.8 | 52.7 (34.7-76.3) | 52.5 (34.8-76.1) | -0.4 | 0 (-0.01 to 0.01)      |
| <b>Tropical Latin America</b>    | 86131.8 (56209-124848.2)   | 117552 (76818.8-170312.3)   | 36.5  | 53.8 (35.2-78.2) | 53.9 (35.2-78)   | 0.2  | 0.01 (0.01 to 0.01)    |
| Brazil                           | 83806.7 (54763.7-121393.8) | 113727 (74291.2-164759)     | 35.7  | 53.8 (35.2-78.1) | 53.9 (35.2-78)   | 0.2  | 0.01 (0.01 to 0.01)    |
| Paraguay                         | 2325.1 (1495.8-3408.2)     | 3825 (2479.7-5613.1)        | 64.5  | 54.1 (35.1-79)   | 54.4 (35.5-79.5) | 0.6  | 0.02 (0.02 to 0.02)    |
| <b>East Asia</b>                 | 680072.4 (444396-996213.7) | 778339.3 (509696.8-1129871) | 14.4  | 54.3 (35.4-79.6) | 56.6 (37-82.7)   | 4.2  | 0.14 (0.13 to 0.14)    |

|                                       |                                 |                                  |      |                     |                     |      |                            |
|---------------------------------------|---------------------------------|----------------------------------|------|---------------------|---------------------|------|----------------------------|
|                                       |                                 |                                  |      |                     |                     |      | 0.15<br>)                  |
| China                                 | 664748.2<br>(433995.7-974658.5) | 761041.6<br>(498324.6-1104699.5) | 14.5 | 54.9<br>(35.8-80.6) | 57.3<br>(37.4-83.8) | 4.4  | 0.14<br>(0.13 to 0.15<br>) |
| Democratic People's Republic of Korea | 8384.4<br>(5440.5-12260.2)      | 10120.7<br>(6496.9-14820.6)      | 20.7 | 38.7<br>(25-56.2)   | 40.3<br>(25.9-58.9) | 4.1  | 0.16<br>(0.15 to 0.17<br>) |
| Taiwan (province of China)            | 6939.9<br>(4535.6-9910.2)       | 7177<br>(4776.7-10250.6)         | 3.4  | 33.6<br>(22-48.1)   | 33.3<br>(22.1-47.9) | -0.9 | -0.03<br>(-0.04 to -0.03)  |
| <b>Southeast Asia</b>                 | 233298.1<br>(151876.5-343401.2) | 321010.4<br>(208179.1-470065.7)  | 37.6 | 47.3<br>(30.9-69.5) | 47.8<br>(31-70.1)   | 1.1  | 0.04<br>(0.04 to 0.05<br>) |
| Cambodia                              | 5185.4<br>(3381.1-7563.8)       | 8021.6<br>(5134.3-11612.6)       | 54.7 | 45.5<br>(30-66.1)   | 46.9<br>(30.1-67.9) | 3.1  | 0.11<br>(0.11 to 0.12<br>) |
| Indonesia                             | 91886.1<br>(59995.7-135108.7)   | 123166.7<br>(80103.6-179318.3)   | 34.0 | 47<br>(30.7-69)     | 47.5<br>(30.9-69.1) | 1.1  | 0.04<br>(0.04 to 0.05<br>) |
| Lao People's Democratic Republic      | 2087.4<br>(1343.5-3037)         | 3526.1<br>(2297.7-5111.9)        | 68.9 | 46.5<br>(30.3-67.3) | 47.5<br>(31-68.7)   | 2.2  | 0.08<br>(0.07 to 0.08<br>) |
| Malaysia                              | 9065<br>(5917.3-13081.9)        | 15573.9<br>(10150.5-22892.3)     | 71.8 | 48.8<br>(31.6-69.8) | 49.6<br>(32.4-72.9) | 1.6  | 0.07<br>(0.06 to 0.07<br>) |

|             |                              |                              |       |                     |                     |      |                           |
|-------------|------------------------------|------------------------------|-------|---------------------|---------------------|------|---------------------------|
|             |                              |                              |       |                     |                     |      | )                         |
| Maldives    | 116.8<br>(76.1-170.5)        | 270.6<br>(175.6-397.7)       | 131.6 | 49.4<br>(32.3-72.3) | 52.7<br>(34.4-77.1) | 6.7  | 0.24<br>(0.18 to 0.3)     |
| Mauritius   | 550.7<br>(358.4-802.2)       | 587.6<br>(383.6-849.6)       | 6.7   | 48.6<br>(31.8-70.8) | 48.7<br>(31.8-70.6) | 0.2  | 0 (0 to 0.01)             |
| Myanmar     | 20414.2<br>(13463.7-30215.7) | 25672.7<br>(16843.4-38050.3) | 25.8  | 46.8<br>(30.9-69.3) | 46.6<br>(30.6-69.1) | -0.4 | -0.01<br>(-0.02 to -0.01) |
| Philippines | 32315.5<br>(21049.4-47081.3) | 55789.3<br>(36451.7-81071.4) | 72.6  | 47.8<br>(31.2-69.3) | 48.2<br>(31.6-70.1) | 0.8  | 0.04<br>(0.03 to 0.04)    |
| Sri Lanka   | 8857.3<br>(5741.4-12856.3)   | 10403.8<br>(6834.5-15214.8)  | 17.5  | 49.7<br>(32.2-72.1) | 49<br>(32.2-71.7)   | -1.4 | -0.04<br>(-0.05 to -0.04) |
| Seychelles  | 36.6 (23.7-53.3)             | 49.6 (32.4-71.9)             | 35.5  | 48.6<br>(31.5-70.7) | 49.8<br>(32.3-72.4) | 2.5  | 0.11<br>(0.09 to 0.12)    |
| Thailand    | 27986.4<br>(18197.4-40688.8) | 31043.2<br>(20123.1-45087.6) | 10.9  | 47.6<br>(31.1-69.5) | 47.8<br>(31-69.5)   | 0.4  | 0.03<br>(0.02 to 0.04)    |
| Timor-Leste | 405.2<br>(263.6-592.6)       | 671.9<br>(438.9-968.7)       | 65.8  | 48<br>(31.2-70.3)   | 47.7<br>(31.2-69)   | -0.6 | 0.01<br>(-0.01 to 0.03)   |

|                                     |                              |                              |       |                     |                     |      |                           |
|-------------------------------------|------------------------------|------------------------------|-------|---------------------|---------------------|------|---------------------------|
|                                     |                              |                              |       |                     |                     |      | )                         |
| Viet Nam                            | 34081.4<br>(22040.9-49905.2) | 45812.9<br>(29973.9-67121.4) | 34.4  | 47.2<br>(30.6-69)   | 48.4<br>(31.6-71.3) | 2.5  | 0.09<br>(0.08 to 0.1)     |
| <b>Oceania</b>                      | 3049.5<br>(1985.2-4417.8)    | 6135.6<br>(3979.6-8860.3)    | 101.2 | 44<br>(28.7-63.9)   | 43.9<br>(28.6-63.2) | -0.2 | 0<br>(-0.01 to 0)         |
| American Samoa                      | 23.2 (15-34.4)               | 25.1 (16.3-36.5)             | 8.0   | 45.1<br>(29.2-66.6) | 44.5<br>(28.9-65)   | -1.3 | -0.05<br>(-0.05 to -0.04) |
| Micronesia<br>(Federated States of) | 49.8 (32.4-72.9)             | 46.3 (29.9-67.8)             | -7.0  | 44.1<br>(28.7-64.3) | 44<br>(28.4-64)     | -0.2 | 0<br>(-0.01 to 0.01)      |
| Fiji                                | 354.1<br>(230.1-516.4)       | 406.8 (264-596.4)            | 14.9  | 44.1<br>(28.7-63.9) | 44.1<br>(28.6-64.4) | 0.0  | 0 (0 to 0.01)             |
| Guam                                | 65.4 (42.1-95.8)             | 76.5 (49.8-112.6)            | 16.9  | 46<br>(29.4-67.7)   | 45.4<br>(29.6-66.9) | -1.3 | -0.04<br>(-0.07 to -0.02) |
| Kiribati                            | 33.9 (22.3-50.1)             | 53.3 (34.6-77.6)             | 57.0  | 42.7<br>(28.1-62.8) | 42.6<br>(27.6-61.8) | -0.2 | 0<br>(-0.01 to 0.01)      |
| Marshall Islands                    | 22.1 (14.1-32.2)             | 25.9 (17.2-37.4)             | 17.3  | 44.1<br>(28.6-64.2) | 44<br>(29-63.5)     | -0.2 | 0 (0 to 0)                |

|                                |                            |                              |       |                  |                  |      |                        |
|--------------------------------|----------------------------|------------------------------|-------|------------------|------------------|------|------------------------|
| Northern Mariana Islands       | 21.7 (14.1-31.8)           | 18.6 (12.2-27.6)             | -14.0 | 46.4 (30.3-67.8) | 45.9 (30.3-67.7) | -1.1 | -0.02 (-0.07 to 0.02)  |
| Papua New Guinea               | 1922.6 (1246.2-2810.4)     | 4578.1 (2978.1-6636.5)       | 138.1 | 43.8 (28.6-63.9) | 43.8 (28.6-63.3) | 0.0  | 0.01 (0.01 to 0.02)    |
| Samoa                          | 79.2 (51.5-117.1)          | 98.4 (64.1-146.1)            | 24.2  | 45.3 (29.6-67)   | 44.9 (29.1-66.5) | -0.9 | -0.03 (-0.03 to -0.02) |
| Solomon Islands                | 163.9 (105.9-234.7)        | 307.1 (200.1-443.6)          | 87.3  | 44.5 (29.1-63.6) | 44 (28.6-63.2)   | -1.1 | -0.05 (-0.05 to -0.04) |
| Tonga                          | 45.5 (29.7-65.5)           | 46.6 (30-68)                 | 2.4   | 44 (28.7-63.2)   | 44 (28.4-63.7)   | 0.0  | -0.01 (-0.03 to 0)     |
| Vanuatu                        | 72.1 (46.7-107.6)          | 135.9 (87.9-199.6)           | 88.5  | 44.3 (28.7-65.3) | 43.9 (28.5-64.6) | -0.9 | -0.03 (-0.03 to -0.03) |
| <b>North Africa and Middle</b> | 170028 (110895.4-247697.3) | 287616.5 (188299.3-418661.6) | 69.2  | 46.3 (30.2-67.6) | 46.4 (30.4-67.5) | 0.2  | 0.01 (0.01 to 0.01)    |

| East                       |                              |                              |       |                     |                     |      | )                         |
|----------------------------|------------------------------|------------------------------|-------|---------------------|---------------------|------|---------------------------|
| Afghanistan                | 5198.8<br>(3394.5-7531.1)    | 18286.2<br>(11991-26467.5)   | 251.7 | 42.1<br>(27.5-60.8) | 43.4<br>(28.6-62.8) | 3.1  | 0.08<br>(0.07 to 0.09)    |
| Algeria                    | 11998<br>(7789.5-17737.3)    | 18750.3<br>(12174.5-27499.3) | 56.3  | 44.4<br>(28.9-65)   | 44.5<br>(28.9-65.6) | 0.2  | 0.01<br>(0.01 to 0.02)    |
| Bahrain                    | 256.4<br>(165.6-377.9)       | 704.8<br>(460.9-1029.6)      | 174.9 | 47.9<br>(31-70.3)   | 48.3<br>(31.7-70.8) | 0.8  | 0.08<br>(0.06 to 0.1)     |
| Egypt                      | 26140.2<br>(16825.6-38395.4) | 45661.7<br>(29476.6-66068.9) | 74.7  | 44.2<br>(28.5-65)   | 44.7<br>(29.1-64.6) | 1.1  | 0.05<br>(0.04 to 0.05)    |
| Iran (Islamic Republic of) | 34582.9<br>(22489.4-50672.3) | 47262.3<br>(31078.1-68539.4) | 36.7  | 55.4<br>(36.2-80.6) | 56.4<br>(37-81.7)   | 1.8  | 0.03<br>(0.02 to 0.05)    |
| Iraq                       | 8302.9<br>(5442.2-12178.3)   | 19279.9<br>(12620.6-28034.1) | 132.2 | 43.5<br>(28.4-63.3) | 43.8<br>(28.7-64)   | 0.7  | 0 (0 to 0.01)             |
| Jordan                     | 1852.5<br>(1201.8-2715.7)    | 5531.8<br>(3631.3-8196.9)    | 198.6 | 45.4<br>(29.5-67)   | 46<br>(30.1-67.9)   | 1.3  | 0.04<br>(0.02 to 0.06)    |
| Kuwait                     | 884.2<br>(571.6-1314.2)      | 2046.4<br>(1337-3023.8)      | 131.4 | 48.3<br>(31.5-71.6) | 46.6<br>(30.6-68.5) | -3.5 | -0.13<br>(-0.18 to -0.09) |
| Lebanon                    | 1583.3<br>(1022.6-2339)      | 2373.9<br>(1547.2-3483.9)    | 49.9  | 46.3<br>(29.8-68)   | 46.2<br>(30.2-67)   | -0.2 | -0.01                     |

|              |                             |                              |       |                     |                     |      |                         |
|--------------|-----------------------------|------------------------------|-------|---------------------|---------------------|------|-------------------------|
|              |                             |                              |       | 2)                  | 9)                  |      | (-0.01 to 0)            |
| Libya        | 2008.4<br>(1296-2918.6)     | 2933.3<br>(1911.3-4302.7)    | 46.1  | 44.5<br>(28.6-64.6) | 43.7<br>(28.6-64.4) | -1.8 | -0.02<br>(-0.04 to 0)   |
| Morocco      | 11691.5<br>(7617.2-17083.5) | 15796.4<br>(10196.7-22977.5) | 35.1  | 43.6<br>(28.4-63.7) | 43.9<br>(28.3-64)   | 0.7  | 0.03<br>(0.02 to 0.04)  |
| Oman         | 943.1<br>(612.6-1367.4)     | 2241.8<br>(1472.8-3301.5)    | 137.7 | 45.6<br>(29.7-65.8) | 46.3<br>(30.6-67.9) | 1.5  | 0.1<br>(0.04 to 0.16)   |
| Palestine    | 997.9<br>(647.6-1469.9)     | 2328.3<br>(1512.5-3384.4)    | 133.3 | 44<br>(28.7-65)     | 44.4<br>(28.9-64.4) | 0.9  | 0.02<br>(0.01 to 0.03)  |
| Qatar        | 238.7<br>(154.4-349.9)      | 1586.1<br>(1040.8-2319.9)    | 564.6 | 50.8<br>(33-74.5)   | 52.6<br>(34-75.9)   | 3.5  | 0.2<br>(0.15 to 0.24)   |
| Saudi Arabia | 8040.4<br>(5230.3-11744)    | 17169.6<br>(11130.5-24919.9) | 113.5 | 47.3<br>(30.9-69.1) | 47.4<br>(30.8-68.7) | 0.2  | 0.01<br>(-0.01 to 0.03) |
| Sudan        | 9477.7<br>(6190.6-13796.4)  | 18949.6<br>(12405.4-27631.2) | 99.9  | 43.4<br>(28.3-63.1) | 43.7<br>(28.6-64.3) | 0.7  | 0.02<br>(0.01 to 0.02)  |
| Syrian Arab  | 6222.5<br>(3983-9015.3)     | 6323<br>(4171.4-9321.3)      | 1.6   | 44.6<br>(28.8-64.   | 43.2<br>(28.6-63.   | -3.1 | -0.11                   |

|                      |                                 |                                  |       |                     |                     |      |                        |
|----------------------|---------------------------------|----------------------------------|-------|---------------------|---------------------|------|------------------------|
| Republic             |                                 |                                  |       | 6)                  | 4)                  |      | (-0.15 to -0.06)       |
| Tunisia              | 3959.7<br>(2570.3-5828.1)       | 5015.8<br>(3309.8-7319.1)        | 26.7  | 44.7<br>(29.1-65.6) | 44.4<br>(29.3-65)   | -0.7 | -0.02 to -0.02)        |
| Turkey               | 27963<br>(18333.6-41349.4)      | 35525.8<br>(23267.4-52159.1)     | 27.0  | 44.7<br>(29.3-65.8) | 44.9<br>(29.5-66.2) | 0.4  | 0 (0 to 0.01)          |
| United Arab Emirates | 995.3<br>(642.4-1447.6)         | 4866.7<br>(3120.4-7069.9)        | 389.0 | 50.2<br>(32.2-73.4) | 50.5<br>(33-73.5)   | 0.6  | 0.07 (0.03 to 0.11)    |
| Yemen                | 6576.3<br>(4326.5-9542)         | 14690.6<br>(9547.3-21262.4)      | 123.4 | 43.3<br>(28.6-62.4) | 43.5<br>(28.3-62.8) | 0.5  | 0 (-0.01 to 0)         |
| <b>South Asia</b>    | 512702.2<br>(337802.5-748333.4) | 808171.2<br>(530435.4-1176149.1) | 57.6  | 44<br>(29-64.4)     | 44<br>(28.9-63.9)   | 0.0  | 0 (-0.01 to 0)         |
| Bangladesh           | 52878.5<br>(34825.4-77931.1)    | 71746.1<br>(46893.7-106532.3)    | 35.7  | 45.2<br>(29.6-66.1) | 44.6<br>(29.2-66.5) | -1.3 | -0.06 (-0.08 to -0.05) |
| Bhutan               | 299.9<br>(197.3-429.8)          | 347.7<br>(226.4-501.3)           | 15.9  | 45.5<br>(29.8-65.2) | 45.4<br>(29.7-65.4) | -0.2 | 0.01 (0 to 0.02)       |



|                                    |                                 |                                |      |                     |                     |      |                        |
|------------------------------------|---------------------------------|--------------------------------|------|---------------------|---------------------|------|------------------------|
| India                              | 394785.7<br>(259379.6-577599.3) | 614506.1<br>(402558-899130.6)  | 55.7 | 43.6<br>(28.6-64)   | 43.7<br>(28.6-63.9) | 0.2  | 0 (0 to 0.01)          |
| Nepal                              | 9359.7<br>(6147.4-13732.1)      | 13719.6<br>(8975.2-20182.7)    | 46.6 | 44.6<br>(29-65.6)   | 43.9<br>(28.7-64.1) | -1.6 | -0.05 (-0.06 to -0.04) |
| Pakistan                           | 55378.4<br>(36603.5-81494.4)    | 107851.7<br>(70963.8-157820.9) | 94.8 | 45.8<br>(30.4-67.2) | 45.3<br>(29.8-66.4) | -1.1 | -0.04 (-0.04 to -0.03) |
| <b>Southern sub-Saharan Africa</b> | 31424.5<br>(20608.1-45812.5)    | 45504.8<br>(29824.8-65835.7)   | 44.8 | 56.2<br>(36.7-81.3) | 56.4<br>(37-81.4)   | 0.4  | 0.02 (0.01 to 0.03)    |
| Botswana                           | 784.5<br>(507.2-1137.8)         | 1365.4<br>(884.5-1980.6)       | 74.1 | 55.6<br>(36-79.9)   | 56.4<br>(36.6-81.8) | 1.4  | 0.05 (0.04 to 0.06)    |
| Lesotho                            | 1082.7<br>(710.7-1594.4)        | 1221.8<br>(787.4-1796.8)       | 12.8 | 55.8<br>(36.7-82)   | 55.9<br>(36.1-82.1) | 0.2  | -0.01 (-0.02 to 0)     |
| Namibia                            | 848.4<br>(554.3-1223.3)         | 1409.4<br>(911.5-2042.8)       | 66.1 | 56<br>(36.7-81)     | 55.8<br>(36.2-80.8) | -0.4 | -0.01 (-0.02 to 0)     |
| South Africa                       | 21879.5<br>(14312.2-31701.8)    | 31885.8<br>(20921.9-45879.6)   | 45.7 | 56.2<br>(36.9-81.5) | 56.8<br>(37.2-81.8) | 1.1  | 0.04 (0.03 to 0.05)    |

|                                   |                                |                               |       |                     |                     |      |                           |
|-----------------------------------|--------------------------------|-------------------------------|-------|---------------------|---------------------|------|---------------------------|
|                                   |                                |                               |       |                     |                     |      | 0.05<br>)                 |
| Eswatini                          | 490<br>(318.2-719.2)           | 676.2<br>(441.8-989.9)        | 38.0  | 55<br>(35.7-80.7)   | 55.5<br>(36.4-81.2) | 0.9  | 0.02<br>(0.01 to 0.04)    |
| Zimbabwe                          | 6339.4<br>(4133.9-9323.2)      | 8946.3<br>(5833.4-12973.3)    | 41.1  | 56.2<br>(36.5-81.7) | 55.4<br>(36.2-80.3) | -1.4 | -0.04<br>(-0.06 to -0.03) |
| <b>Western sub-Saharan Africa</b> | 117110.5<br>(76700.5-169033.3) | 276572.7<br>(181323-400817.7) | 136.2 | 56.7<br>(37.2-81.6) | 56.2<br>(36.9-81.3) | -0.9 | -0.03<br>(-0.04 to -0.02) |
| Benin                             | 2970.2<br>(1942.4-4357)        | 7761.5<br>(5064.6-11182.2)    | 161.3 | 55.6<br>(36.5-80.6) | 56.4<br>(37-81.7)   | 1.4  | 0.04<br>(0.04 to 0.05)    |
| Burkina Faso                      | 5759.6<br>(3767.2-8332.1)      | 13767.7<br>(9010.6-20270.1)   | 139.0 | 54.9<br>(35.8-79.5) | 55.7<br>(36.4-81.5) | 1.5  | 0.05<br>(0.05 to 0.06)    |
| Cameroon                          | 6328.3<br>(4171-9095.9)        | 17736<br>(11674.7-25919.5)    | 180.3 | 56<br>(37-80.7)     | 56.7<br>(37.6-82.6) | 1.3  | 0.05<br>(0.05 to 0.05)    |
| Cabo Verde                        | 211.8<br>(137-313.6)           | 333.7<br>(217.8-492.4)        | 57.5  | 55.9<br>(36.5-82.5) | 58.1<br>(37.9-86)   | 3.9  | 0.14<br>(0.14 to 0.15)    |
| Chad                              | 3652.7<br>(2389.3-5273.8)      | 10191.9<br>(6621-14926.7)     | 179.0 | 55.6<br>(36.3-80.)  | 56.7<br>(37-82.6)   | 2.0  | 0.07<br>(0.0)             |

|                   |                                |                                  |       |                         |                         |      |                                             |
|-------------------|--------------------------------|----------------------------------|-------|-------------------------|-------------------------|------|---------------------------------------------|
|                   |                                |                                  |       | 4)                      |                         |      | 7 to<br>0.07<br>)                           |
| Côte<br>d'Ivoire  | 7568.7<br>(4963.3-11025.3<br>) | 16076.4<br>(10614.2-23548.6<br>) | 112.4 | 57<br>(37.6-83.<br>2)   | 57.6<br>(38.2-84.<br>3) | 1.1  | 0.04<br>(0.0<br>4 to<br>0.05<br>)           |
| Gambia            | 610.7<br>(401.9-886.2)         | 1356.1<br>(886-1968.6)           | 122.0 | 57<br>(37.6-82.<br>6)   | 56.4<br>(36.9-81.<br>6) | -1.1 | -0.0<br>5<br>(-0.<br>06<br>to<br>-0.0<br>4) |
| Ghana             | 9182.6<br>(5959-13440.3)       | 18710.4<br>(12379.3-27302.9<br>) | 103.8 | 56.5<br>(36.6-82.<br>8) | 56.1<br>(37.3-81.<br>9) | -0.7 | -0.0<br>3<br>(-0.<br>04<br>to<br>-0.0<br>2) |
| Guinea            | 3729.5<br>(2390-5363.4)        | 7657.1<br>(5051.5-11044.3)       | 105.3 | 56<br>(36.1-80.<br>6)   | 56<br>(36.9-80.<br>9)   | 0.0  | -0.0<br>1<br>(-0.<br>02<br>to<br>0)         |
| Guinea-Bis<br>sau | 610.3<br>(400.6-883.8)         | 1146.8<br>(751.3-1646.7)         | 87.9  | 55.3<br>(36.3-79.<br>5) | 55.7<br>(36.6-79.<br>9) | 0.7  | 0.02<br>(0.0<br>2 to<br>0.02<br>)           |
| Liberia           | 1166.6<br>(770.6-1678.2)       | 2884.1<br>(1879.7-4236.9)        | 147.2 | 55.5<br>(36.2-79.<br>9) | 56.7<br>(36.9-82.<br>7) | 2.2  | 0.08<br>(0.0<br>7 to<br>0.09<br>)           |
| Mali              | 5253.4<br>(3450.8-7597)        | 13448.9<br>(8721.3-19496.5)      | 156.0 | 55.9<br>(36.5-81.<br>2) | 56.6<br>(36.7-81.<br>7) | 1.3  | 0.05<br>(0.0<br>5 to<br>0.06<br>)           |

|                                   |                              |                                 |       |                     |                     |      |                       |
|-----------------------------------|------------------------------|---------------------------------|-------|---------------------|---------------------|------|-----------------------|
| Mauritania                        | 1266.7<br>(821.8-1840.8)     | 2426.3<br>(1570.8-3496.6)       | 91.5  | 57<br>(37-82.9)     | 57.1<br>(37.1-82.4) | 0.2  | 0 (0 to 0)            |
| Niger                             | 4945.8<br>(3253-7142.2)      | 14507.2<br>(9506.4-21243.5)     | 193.3 | 56.5<br>(37.2-81.6) | 56.5<br>(37-82.7)   | 0.0  | 0 (0 to 0.01)         |
| Nigeria                           | 54715.4<br>(35933.3-78512.5) | 129491.9<br>(84898.3-188176.9)  | 136.7 | 57.3<br>(37.7-82.4) | 55.9<br>(36.8-81.2) | -2.4 | -0.08 (-0.1 to -0.06) |
| Sao Tome and Principe             | 74.4 (48.7-107.4)            | 123.8<br>(80.4-180.2)           | 66.4  | 56.7<br>(37.1-81.7) | 57.4<br>(37.3-83.5) | 1.2  | 0.05 (0.04 to 0.06)   |
| Senegal                           | 4640.3<br>(3013.2-6728.2)    | 9215.5<br>(5955.4-13525.3)      | 98.6  | 56.2<br>(36.4-81.1) | 57.1<br>(37.4-83)   | 1.6  | 0.06 (0.06 to 0.06)   |
| Sierra Leone                      | 2177.4<br>(1433.1-3173.8)    | 4987.8<br>(3302.8-7209.4)       | 129.1 | 55.8<br>(36.6-80.6) | 56.4<br>(37.5-81.8) | 1.1  | 0.07 (0.06 to 0.09)   |
| Togo                              | 2242.2<br>(1462.1-3262.1)    | 4745.7<br>(3097.6-6849.6)       | 111.7 | 55.6<br>(36.4-80.8) | 56<br>(36.7-80.7)   | 0.7  | 0.02 (0.01 to 0.02)   |
| <b>Eastern sub-Saharan Africa</b> | 118378<br>(77519.2-171365.1) | 255581.7<br>(168416.4-369497.7) | 115.9 | 57.1<br>(37.3-82.6) | 57.4<br>(37.7-83.1) | 0.5  | 0.03 (0.03 to 0.03)   |
| Burundi                           | 3430.8<br>(2233.4-4960.5)    | 7380.3<br>(4800.1-10659.4)      | 115.1 | 56.3<br>(36.7-81)   | 57.3<br>(37.6-82.5) | 1.8  | 0.08 (0.06 to 0.09)   |

|            |                              |                              |       |                     |                     |     |                        |
|------------|------------------------------|------------------------------|-------|---------------------|---------------------|-----|------------------------|
| Comoros    | 289<br>(188.5-420.6)         | 428.7<br>(281.7-623.7)       | 48.3  | 57.5<br>(37.6-83.7) | 58.1<br>(38.2-84.6) | 1.0 | 0.04<br>(0.04 to 0.05) |
| Djibouti   | 317.5<br>(208.3-465)         | 751<br>(491.1-1090.8)        | 136.5 | 59.9<br>(39-87.4)   | 59.9<br>(39.2-86.5) | 0.0 | 0.01<br>(0.01 to 0.02) |
| Eritrea    | 1867<br>(1226.5-2657.1)      | 4141.2<br>(2677.9-5940.5)    | 121.8 | 56.2<br>(36.8-80.8) | 57.2<br>(37.3-82.3) | 1.8 | 0.06<br>(0.06 to 0.07) |
| Ethiopia   | 32280.8<br>(21166.2-47059.3) | 67478.9<br>(44394.9-97295.5) | 109.0 | 57.6<br>(38-83.7)   | 58.2<br>(38.4-84)   | 1.0 | 0.04<br>(0.03 to 0.04) |
| Kenya      | 14668.1<br>(9595.2-21231)    | 31070.4<br>(20265.9-44989.2) | 111.8 | 57.8<br>(37.8-83.5) | 58<br>(37.8-83.9)   | 0.3 | 0.03<br>(0.02 to 0.04) |
| Madagascar | 7385<br>(4818.8-10675.6)     | 16477.3<br>(10715.1-23844.6) | 123.1 | 57.1<br>(37.4-82.7) | 57.6<br>(37.3-83.1) | 0.9 | 0.04<br>(0.03 to 0.04) |
| Malawi     | 5879.4<br>(3868.4-8584.8)    | 11297.1<br>(7418-16554)      | 92.1  | 56.5<br>(37-81.8)   | 56.5<br>(37-82.3)   | 0.0 | 0.01<br>(0 to 0.01)    |
| Mozambique | 7875.5<br>(5206.1-11371)     | 18101.1<br>(11980.9-26150.1) | 129.8 | 55.5<br>(36.7-79.9) | 55.8<br>(36.7-80.6) | 0.5 | 0.03<br>(0.02 to 0.03) |
| Rwanda     | 4432.3<br>(2911.5-6437.6)    | 7678.3<br>(4992.6-11044.1)   | 73.2  | 56.4<br>(37.3-81.9) | 56.6<br>(36.9-81.9) | 0.4 | 0.03<br>(0 to to)      |

|                                   |                              |                               |       |                     |                     |      |                                 |
|-----------------------------------|------------------------------|-------------------------------|-------|---------------------|---------------------|------|---------------------------------|
|                                   |                              |                               |       |                     |                     |      | 0.07<br>)                       |
| Somalia                           | 4531.6<br>(2958.9-6554.7)    | 12880.2<br>(8445.8-18652)     | 184.2 | 57.7<br>(37.9-82.9) | 57.5<br>(38.1-82.7) | -0.3 | -0.01<br>to<br>0)               |
| South Sudan                       | 3713.7<br>(2368.9-5387.7)    | 5743.4<br>(3755.3-8325.3)     | 54.7  | 58.8<br>(38.1-85.2) | 57.1<br>(37.5-82.2) | -2.9 | -0.11<br>to<br>-0.09)           |
| United Republic of Tanzania       | 15824.6<br>(10415.8-22880.7) | 34656.9<br>(22505.9-50586.5)  | 119.0 | 56.1<br>(36.9-81)   | 56.7<br>(37-81.7)   | 1.1  | 0.054<br>to<br>0.05)            |
| Uganda                            | 10893.2<br>(7050-15878.1)    | 26105.8<br>(16928.1-37702.7)  | 139.7 | 57.3<br>(37.5-83.1) | 57.6<br>(37.6-83)   | 0.5  | 0.032<br>to<br>0.04)            |
| Zambia                            | 4902.6<br>(3181.2-7041.7)    | 11186.8<br>(7283.5-16248.9)   | 128.2 | 56.6<br>(36.9-81.4) | 56.8<br>(37-81.9)   | 0.4  | 0.021<br>to<br>0.02)            |
| <b>Central sub-Saharan Africa</b> | 33720.1<br>(21810.6-48808.1) | 79879.2<br>(52612.3-116383.7) | 136.9 | 55.7<br>(36.1-80.3) | 56.2<br>(37.1-81.4) | 0.9  | 0.033<br>to<br>0.04)            |
| Angola                            | 6355<br>(4099.8-9316.3)      | 18367.1<br>(11847.3-26983.7)  | 189.0 | 56.7<br>(37.2-82)   | 55.8<br>(36.2-81.5) | -1.6 | -0.06<br>(-0.07<br>to<br>-0.04) |
| Central African                   | 1645.6<br>(1091.8-2398.8)    | 3172.9<br>(2084.3-4577.1)     | 92.8  | 55.1<br>(36.5-80.   | 55.3<br>(36.5-80)   | 0.4  | 0.01<br>(0.0                    |

|                                            |                            |                              |       |                     |                     |      |                               |
|--------------------------------------------|----------------------------|------------------------------|-------|---------------------|---------------------|------|-------------------------------|
| Republic                                   |                            |                              |       | 7)                  |                     |      | 1 to<br>0.02<br>)             |
| Congo                                      | 1480.9<br>(966.7-2139.9)   | 3137.7<br>(2034.1-4579.4)    | 111.9 | 55.7<br>(36.6-81.1) | 56.5<br>(36.6-82.1) | 1.4  | 0.06<br>(0.05 to<br>0.06<br>) |
| Democrati<br>c Republic<br>of the<br>Congo | 23384<br>(15138.9-34064.8) | 53280.6<br>(35278.6-77632.9) | 127.9 | 55.4<br>(36-80.8)   | 56.3<br>(37.3-81.8) | 1.6  | 0.06<br>(0.05 to<br>0.06<br>) |
| Equatorial<br>Guinea                       | 257.2<br>(169.3-367.1)     | 903.7<br>(591.6-1306.4)      | 251.4 | 54.3<br>(35.8-77.9) | 57.9<br>(38.1-84)   | 6.6  | 0.25<br>(0.23 to<br>0.26<br>) |
| Gabon                                      | 597.5<br>(386.4-881.2)     | 1017.2<br>(665.7-1466.9)     | 70.2  | 56.5<br>(36.6-83.5) | 55.9<br>(36.8-80.6) | -1.1 | -0.03<br>(-0.04 to<br>-0.03)  |

Note: ASD, autism spectrum disorders; DALY, disability-adjusted life year; GBD, Global Burden of Disease; SDI, sociodemographic index.

**eTable 4 . Top 20 countries with autism spectrum disorders in 2019.**

| <b>Rank</b> | <b>Prevalent cases</b>           | <b>ASPR</b>              | <b>Incident cases</b>            | <b>ASIR</b>              | <b>DALYs</b>                     | <b>Age-standardized DALY rate</b> |
|-------------|----------------------------------|--------------------------|----------------------------------|--------------------------|----------------------------------|-----------------------------------|
| 1           | China                            | United Kingdom           | India                            | Andorra                  | China                            | United Kingdom                    |
| 2           | India                            | Sweden                   | China                            | United Kingdom           | India                            | Sweden                            |
| 3           | United States of America         | Japan                    | Nigeria                          | Sweden                   | United States of America         | Japan                             |
| 4           | Nigeria                          | United States of America | United States of America         | Japan                    | Nigeria                          | United States of America          |
| 5           | Indonesia                        | Netherlands              | Pakistan                         | United States of America | Indonesia                        | Netherlands                       |
| 6           | Japan                            | Canada                   | Ethiopia                         | Netherlands              | Japan                            | Canada                            |
| 7           | Brazil                           | Ireland                  | Indonesia                        | Canada                   | Brazil                           | Ireland                           |
| 8           | Pakistan                         | Singapore                | Brazil                           | Ireland                  | Pakistan                         | Singapore                         |
| 9           | Russian Federation               | Andorra                  | Democratic Republic of the Congo | Brunei Darussalam        | Russian Federation               | Andorra                           |
| 10          | United Kingdom                   | Spain                    | Philippines                      | Singapore                | Bangladesh                       | Spain                             |
| 11          | Bangladesh                       | Malta                    | United Republic of Tanzania      | Spain                    | Mexico                           | Malta                             |
| 12          | Mexico                           | Switzerland              | Bangladesh                       | Cyprus                   | United Kingdom                   | Switzerland                       |
| 13          | Germany                          | Germany                  | Mexico                           | Republic of Korea        | Ethiopia                         | Germany                           |
| 14          | Ethiopia                         | Luxembourg               | Russian Federation               | Switzerland              | Germany                          | Luxembourg                        |
| 15          | Philippines                      | Brunei Darussalam        | Uganda                           | Italy                    | Philippines                      | Brunei Darussalam                 |
| 16          | Democratic Republic of the Congo | Italy                    | Egypt                            | Malta                    | Democratic Republic of the Congo | Italy                             |
| 17          | Italy                            | Austria                  | Japan                            | Greece                   | Iran (Islamic Republic of)       | Austria                           |
| 18          | Iran (Islamic Republic of)       | Iceland                  | United Kingdom                   | Austria                  | Italy                            | Iceland                           |



|    |          |         |                            |          |          |        |
|----|----------|---------|----------------------------|----------|----------|--------|
| 19 | Viet Nam | Belgium | Kenya                      | Portugal | Viet Nam | Greece |
| 20 | Egypt    | Greece  | Iran (Islamic Republic of) | Belgium  | Egypt    | Cyprus |

Note: ASPR, age-standardized prevalence rate; ASIR, age-standardized incidence rate; DALY, disability-adjusted life year; SDI, sociodemographic index.

**eTable 5. Prevalence, incidence, and disability-adjusted life year (DALYs) rates by age group in 1990 and 2019.**

| Rates      | Age group        | 1999  |       |       | 2019  |       |       |
|------------|------------------|-------|-------|-------|-------|-------|-------|
|            |                  | Val   | Upper | Lower | Val   | Upper | Lower |
| Prevalence | 1-4 years        | 430.6 | 510.7 | 356.7 | 438.0 | 520.2 | 363.4 |
| Prevalence | 5-9 years        | 420.0 | 499.5 | 348.8 | 425.0 | 505.3 | 352.8 |
| Prevalence | 10-14 years      | 408.6 | 485.9 | 338.9 | 410.7 | 489.8 | 340.7 |
| Prevalence | 15-19 years      | 398.6 | 475.8 | 329.6 | 396.0 | 473.1 | 327.9 |
| Prevalence | 20-24 years      | 388.3 | 464.6 | 321.2 | 383.0 | 457.9 | 317.5 |
| Prevalence | 25-29 years      | 381.1 | 456.3 | 315.4 | 372.3 | 445.4 | 308.3 |
| Prevalence | 30-34 years      | 373.6 | 447.7 | 309.0 | 362.3 | 434.4 | 299.6 |
| Prevalence | 35-39 years      | 362.3 | 433.9 | 299.0 | 352.1 | 422.1 | 290.5 |
| Prevalence | 40-44 years      | 358.5 | 430.4 | 296.1 | 341.7 | 411.3 | 281.7 |
| Prevalence | 45-49 years      | 346.0 | 417.4 | 285.9 | 334.0 | 403.0 | 275.6 |
| Prevalence | 50-54 years      | 335.9 | 405.1 | 277.8 | 325.0 | 392.1 | 269.0 |
| Prevalence | 55-59 years      | 324.9 | 392.5 | 267.9 | 318.0 | 383.6 | 262.6 |
| Prevalence | 60-64 years      | 313.1 | 378.6 | 257.8 | 307.6 | 371.4 | 253.5 |
| Prevalence | 65-69 years      | 299.3 | 360.8 | 245.8 | 298.2 | 358.3 | 245.0 |
| Prevalence | 70+ years        | 271.0 | 326.4 | 221.6 | 280.6 | 338.0 | 229.4 |
| Prevalence | Age-standardized | 372.8 | 444.9 | 309.1 | 369.4 | 441.2 | 305.9 |
| Prevalence | <1 year          | 435.8 | 519.1 | 362.3 | 444.9 | 530.5 | 369.8 |
| Incidence  | 1-4 years        | NA    | NA    | NA    | NA    | NA    | NA    |
| Incidence  | 5-9 years        | NA    | NA    | NA    | NA    | NA    | NA    |
| Incidence  | 10-14 years      | NA    | NA    | NA    | NA    | NA    | NA    |
| Incidence  | 15-19 years      | NA    | NA    | NA    | NA    | NA    | NA    |
| Incidence  | 20-24 years      | NA    | NA    | NA    | NA    | NA    | NA    |
| Incidence  | 25-29 years      | NA    | NA    | NA    | NA    | NA    | NA    |
| Incidence  | 30-34 years      | NA    | NA    | NA    | NA    | NA    | NA    |
| Incidence  | 35-39 years      | NA    | NA    | NA    | NA    | NA    | NA    |
| Incidence  | 40-44 years      | NA    | NA    | NA    | NA    | NA    | NA    |
| Incidence  | 45-49 years      | NA    | NA    | NA    | NA    | NA    | NA    |
| Incidence  | 50-54 years      | NA    | NA    | NA    | NA    | NA    | NA    |
| Incidence  | 55-59 years      | NA    | NA    | NA    | NA    | NA    | NA    |
| Incidence  | 60-64 years      | NA    | NA    | NA    | NA    | NA    | NA    |

|           |                  |       |       |       |       |       |       |
|-----------|------------------|-------|-------|-------|-------|-------|-------|
| Incidence | 65-69 years      | NA    | NA    | NA    | NA    | NA    | NA    |
| Incidence | 70+ years        | NA    | NA    | NA    | NA    | NA    | NA    |
| Incidence | Age-standardized | 9.2   | 10.9  | 7.6   | 9.3   | 11.1  | 7.7   |
| Incidence | <1 year          | 458.2 | 545.9 | 381.0 | 457.5 | 545.6 | 380.1 |
| DALYs     | 1-4 years        | 67.1  | 98.0  | 43.9  | 68.5  | 98.5  | 45.0  |
| DALYs     | 5-9 years        | 65.4  | 96.0  | 42.9  | 66.3  | 96.7  | 43.4  |
| DALYs     | 10-14 years      | 63.5  | 92.8  | 41.6  | 63.9  | 93.5  | 41.8  |
| DALYs     | 15-19 years      | 61.7  | 89.9  | 40.3  | 61.3  | 89.4  | 39.9  |
| DALYs     | 20-24 years      | 59.9  | 86.8  | 39.1  | 59.1  | 85.7  | 38.6  |
| DALYs     | 25-29 years      | 58.4  | 84.2  | 38.3  | 57.1  | 82.7  | 37.3  |
| DALYs     | 30-34 years      | 56.9  | 82.2  | 37.0  | 55.3  | 80.4  | 36.1  |
| DALYs     | 35-39 years      | 54.9  | 78.8  | 35.9  | 53.4  | 76.7  | 34.9  |
| DALYs     | 40-44 years      | 54.0  | 77.4  | 35.3  | 51.5  | 74.0  | 33.7  |
| DALYs     | 45-49 years      | 51.7  | 74.7  | 34.0  | 50.1  | 72.1  | 32.8  |
| DALYs     | 50-54 years      | 49.8  | 71.7  | 33.0  | 48.3  | 69.4  | 31.9  |
| DALYs     | 55-59 years      | 47.6  | 69.0  | 31.6  | 46.7  | 67.8  | 31.1  |
| DALYs     | 60-64 years      | 45.3  | 64.9  | 30.2  | 44.6  | 64.1  | 29.6  |
| DALYs     | 65-69 years      | 42.6  | 61.7  | 28.5  | 42.5  | 60.9  | 28.6  |
| DALYs     | 70+ years        | 37.4  | 53.5  | 25.2  | 38.7  | 55.3  | 26.0  |
| DALYs     | Age-standardized | 56.7  | 82.2  | 37.0  | 56.3  | 81.5  | 36.8  |
| DALYs     | <1 year          | 67.9  | 97.8  | 44.5  | 69.5  | 100.9 | 45.5  |
